# Supplementary material for: Directed C–H activation with iron carbene complexes
Source: Royal Society of Chemistry journal article supplement (doi:10.1039/d4qi01088d), 2024-01-01
Supplement: d4qi01088d1.pdf [file d4qi01088d1.pdf]

Supporting information for:

**Directed C-H Activation with Iron Carbene Complexes**  
Zachary S. Lincoln, Melissa R. Hoffbauer and Vlad M. Iluc\*

Table of Contents:

|                                                                                                                                                                                                                               |           |
|-------------------------------------------------------------------------------------------------------------------------------------------------------------------------------------------------------------------------------|-----------|
| <b>1. Experimental</b> .....                                                                                                                                                                                                  | <b>4</b>  |
| <b>1.1 General Remarks</b> .....                                                                                                                                                                                              | <b>4</b>  |
| <b>1.2 Synthesis of [PC(sp<sup>3</sup>)HP]Fe(-C<sup>Ar</sup>-CH=NPh-) (2)</b> .....                                                                                                                                           | <b>4</b>  |
| <b>1.3 Synthesis of [PC(sp<sup>3</sup>)HP]Fe(-C<sup>Ar</sup>-C<sup>Bz</sup>=O-)(NC<sup>t</sup>Bu)] (3)</b> .....                                                                                                              | <b>6</b>  |
| <b>1.4 Synthesis of [PC(sp<sup>3</sup>)HP]Fe(-C<sup>Ar</sup>-N=NPh)] (4)</b> .....                                                                                                                                            | <b>7</b>  |
| <b>1.5 Synthesis of [PC(sp<sup>3</sup>)HP]Fe{-C(sp<sup>2</sup>)H-CH-Py-} (5)</b> .....                                                                                                                                        | <b>8</b>  |
| <b>1.6 Synthesis of [PC(sp<sup>3</sup>)HP]Fe{-C(sp<sup>2</sup>)H-CH-Py-}(L) (6)</b> .....                                                                                                                                     | <b>9</b>  |
| <b>1.7 Synthesis of [PC(sp<sup>3</sup>)HP]Fe{-C(sp<sup>3</sup>)H<sub>2</sub>-N<sup>quin</sup>-} (7)</b> .....                                                                                                                 | <b>10</b> |
| <b>2. NMR Spectra</b> .....                                                                                                                                                                                                   | <b>11</b> |
| <b>2.1 NMR Spectrum for [PC(sp<sup>3</sup>)HP]Fe(-C<sup>Ar</sup>-CH=NPh-) (2)</b> .....                                                                                                                                       | <b>11</b> |
| <b>Figure S1. <sup>1</sup>H NMR (400 MHz, C<sub>6</sub>D<sub>6</sub>, 295 K) spectrum of [PC(sp<sup>3</sup>)HP]Fe(-C<sup>Ar</sup>-CH=NPh-) (2).</b> .....                                                                     | <b>11</b> |
| <b>2.2 NMR Spectrum for [PC(sp<sup>3</sup>)HP]Fe(-C<sup>Ar</sup>-C<sup>Bz</sup>=O-)(NC<sup>t</sup>Bu)] (3)</b> .....                                                                                                          | <b>12</b> |
| <b>Figure S2. <sup>1</sup>H NMR (400 MHz, C<sub>6</sub>D<sub>6</sub>, 295 K) of [PC(sp<sup>3</sup>)HP]Fe(-C<sup>Ar</sup>-C<sup>Bz</sup>=O)(NC<sup>t</sup>Bu)] (2).</b> .....                                                  | <b>12</b> |
| <b>2.3 NMR Spectrum for [PC(sp<sup>3</sup>)HP]Fe(-C<sup>Ar</sup>-N=NPh)] (4)</b> .....                                                                                                                                        | <b>13</b> |
| <b>Figure S3. <sup>1</sup>H NMR (400 MHz, C<sub>6</sub>D<sub>6</sub>, 295 K) of [PC(sp<sup>3</sup>)HP]Fe(-C<sup>Ar</sup>-N=NPh-)] (4).</b> .                                                                                  | <b>13</b> |
| <b>2.4 NMR Spectrum for [PC(sp<sup>3</sup>)HP]Fe{-C(sp<sup>2</sup>)H-CH-Py-} (5)</b> .....                                                                                                                                    | <b>14</b> |
| <b>Figure S4. <sup>1</sup>H NMR (400 MHz, C<sub>6</sub>D<sub>6</sub>, 295 K) of [PC(sp<sup>3</sup>)HP]Fe{-C(sp<sup>2</sup>)H-CH-Py-} (5).</b><br>.....                                                                        | <b>14</b> |
| <b>2.5 NMR Spectra for [PC(sp<sup>3</sup>)HP]Fe{-C(sp<sup>2</sup>)H-CH-Py-}(NC<sup>t</sup>Bu)] (6-NC<sup>t</sup>Bu)</b> .....                                                                                                 | <b>15</b> |
| <b>Figure S5. <sup>1</sup>H NMR (600 MHz, C<sub>6</sub>D<sub>6</sub>, 295 K) of [PC(sp<sup>3</sup>)HP]Fe{-C(sp<sup>2</sup>)H-CH-Py-}(L) (6-L). Some signals of 6-N<sub>2</sub> are obscured and cannot be assigned.</b> ..... | <b>15</b> |
| <b>Figure S6. <sup>31</sup>P{H} NMR spectrum (162 MHz, C<sub>6</sub>D<sub>6</sub>, 295 K) of [PC(sp<sup>3</sup>)HP]Fe{-C(sp<sup>2</sup>)H-CH-Py-}(L) (6-L).</b> .....                                                         | <b>16</b> |
| <b>Figure S7. <sup>13</sup>C{H} NMR (151 MHz, C<sub>6</sub>D<sub>6</sub>, 295 K) of [PC(sp<sup>3</sup>)HP]Fe{-C(sp<sup>2</sup>)H-CH-Py-}(NC<sup>t</sup>Bu)] (6-NC<sup>t</sup>Bu).</b> .....                                   | <b>17</b> |
| <b>Figure S8. COSY NMR spectrum (800 MHz, C<sub>6</sub>D<sub>6</sub>, 295 K) of [PC(sp<sup>3</sup>)HP]Fe{-C(sp<sup>2</sup>)H-CH-Py-}(NC<sup>t</sup>Bu)] (6-NC<sup>t</sup>Bu).</b> .....                                       | <b>18</b> |
| <b>Figure 9. HSQC NMR spectrum (800 MHz, C<sub>6</sub>D<sub>6</sub>, 295 K) of [PC(sp<sup>3</sup>)HP]Fe{-C(sp<sup>2</sup>)H-CH-Py-}(NC<sup>t</sup>Bu)] (6-NC<sup>t</sup>Bu).</b> .....                                        | <b>19</b> |
| <b>2.6. NMR Spectra for [PC(sp<sup>3</sup>)HP]Fe{-C(sp<sup>3</sup>)H<sub>2</sub>-N<sup>quin</sup>-} (7)</b> .....                                                                                                             | <b>20</b> |
| <b>Figure S10. <sup>1</sup>H NMR spectrum (800 MHz, C<sub>6</sub>D<sub>6</sub>, 295 K) of [PC(sp<sup>3</sup>)HP]Fe{-C(sp<sup>3</sup>)H<sub>2</sub>-N<sup>quin</sup>-} (7).</b> .....                                          | <b>20</b> |

|                                                                                                                                                                                                                                                                                                |           |
|------------------------------------------------------------------------------------------------------------------------------------------------------------------------------------------------------------------------------------------------------------------------------------------------|-----------|
| <b>3. Crystallographic Tables</b> .....                                                                                                                                                                                                                                                        | <b>21</b> |
| <b>3.1 Crystal data for [PC(sp<sup>3</sup>)HP]Fe(-C<sup>Ar</sup>-CH=NPh-) (2)</b> .....                                                                                                                                                                                                        | <b>21</b> |
| <b>Figure S11. Thermal ellipsoid representation of [PC(sp<sup>3</sup>)HP]Fe(-C<sup>Ar</sup>-CH=NPh-) (2) at the 50% probability level. Most hydrogen atoms omitted for clarity.</b> .....                                                                                                      | <b>21</b> |
| <b>Table S1. Crystal data and structural refinement for [PC(sp<sup>3</sup>)HP]Fe(-C<sup>Ar</sup>-CH=NPh-) (2)</b> .....                                                                                                                                                                        | <b>22</b> |
| <b>Table S2. Atomic coordinates and equivalent isotropic displacement parameters (Å<sup>2</sup>) for [PC(sp<sup>3</sup>)HP]Fe(-C<sup>Ar</sup>-CH=NPh-) (2). U(eq) is defined as one third of the trace of the orthogonalized U<sub>ij</sub> tensor.</b> .....                                  | <b>23</b> |
| <b>Table S3. Anisotropic displacement parameters (Å<sup>2</sup>) for [PC(sp<sup>3</sup>)HP]Fe(-C<sup>Ar</sup>-CH=NPh-) (2). The anisotropic displacement factor exponent takes the form: <math>-2\pi^2[h^2a^{*2}U_{11} + \dots + 2hka^*b^*U_{12}]</math></b> .....                             | <b>26</b> |
| <b>Table S4. Distances [Å] for [PC(sp<sup>3</sup>)HP]Fe(-C<sup>Ar</sup>-CH=NPh-) (2).</b> .....                                                                                                                                                                                                | <b>28</b> |
| <b>Table S5. Angles [°] for [PC(sp<sup>3</sup>)HP]Fe(-C<sup>Ar</sup>-CH=NPh-) (2)</b> .....                                                                                                                                                                                                    | <b>30</b> |
| <b>3.2 Crystal data for [PC(sp<sup>3</sup>)HP]Fe(-C<sup>Ar</sup>-C<sup>Bz</sup>=O-)(NC<sup>t</sup>Bu) (3)</b> .....                                                                                                                                                                            | <b>32</b> |
| <b>Figure S12. Thermal ellipsoid representation of [PC(sp<sup>3</sup>)HP]Fe(-C<sup>Ar</sup>-C<sup>Bz</sup>=O-)(NC<sup>t</sup>Bu) (3) at the 50% probability level. Most hydrogen atoms omitted for clarity.</b> .....                                                                          | <b>32</b> |
| <b>Table S6. Crystal data and structural refinement for [PC(sp<sup>3</sup>)HP]Fe(-C<sup>Ar</sup>-C<sup>Bz</sup>=O-)(NC<sup>t</sup>Bu) (3)</b> .....                                                                                                                                            | <b>33</b> |
| <b>Table S7. Atomic coordinates and equivalent isotropic displacement parameters (Å<sup>2</sup>) for [PC(sp<sup>3</sup>)HP]Fe(-C<sup>Ar</sup>-C<sup>Bz</sup>=O-)(NC<sup>t</sup>Bu) (3). U(eq) is defined as one third of the trace of the orthogonalized U<sub>ij</sub> tensor.</b> .....      | <b>34</b> |
| <b>Table S8. Anisotropic displacement parameters (Å<sup>2</sup>) for [PC(sp<sup>3</sup>)HP]Fe(-C<sup>Ar</sup>-C<sup>Bz</sup>=O-)(NC<sup>t</sup>Bu) (3). The anisotropic displacement factor exponent takes the form: <math>-2\pi^2[h^2a^{*2}U_{11} + \dots + 2hka^*b^*U_{12}]</math></b> ..... | <b>37</b> |
| <b>Table S9. Distances [Å] for [PC(sp<sup>3</sup>)HP]Fe(-C<sup>Ar</sup>-C<sup>Bz</sup>=O-)(NC<sup>t</sup>Bu) (3)</b> .....                                                                                                                                                                     | <b>39</b> |
| <b>Table S10. Angles [°] for [PC(sp<sup>3</sup>)HP]Fe(-C<sup>Ar</sup>-C<sup>Bz</sup>=O-)(NC<sup>t</sup>Bu) (3)</b> .....                                                                                                                                                                       | <b>41</b> |
| <b>3.3 Crystal data for [PC(sp<sup>3</sup>)HP]Fe(-C<sup>Ar</sup>-N=NPh) (4)</b> .....                                                                                                                                                                                                          | <b>44</b> |
| <b>Figure S13. Thermal ellipsoid representation of [PC(sp<sup>3</sup>)HP]Fe(-C<sup>Ar</sup>-N=NPh) (4) at the 50% probability level. Most hydrogen atoms omitted for clarity.</b> .....                                                                                                        | <b>44</b> |
| <b>Table S11. Crystal data and structural refinement [PC(sp<sup>3</sup>)HP]Fe(-C<sup>Ar</sup>-N=NPh) (4)</b> .....                                                                                                                                                                             | <b>45</b> |
| <b>Table S12. Atomic coordinates and equivalent isotropic displacement parameters (Å<sup>2</sup>) for [PC(sp<sup>3</sup>)HP]Fe(-C<sup>Ar</sup>-N=NPh) (4). U(eq) is defined as one third of the trace of the orthogonalized U<sub>ij</sub> tensor.</b> .....                                   | <b>46</b> |
| <b>Table S13. Anisotropic displacement parameters (Å<sup>2</sup>) for [PC(sp<sup>3</sup>)HP]Fe(-C<sup>Ar</sup>-N=NPh) (4). The anisotropic displacement factor exponent takes the form: <math>-2\pi^2[h^2a^{*2}U_{11} + \dots + 2hka^*b^*U_{12}]</math></b> .....                              | <b>49</b> |
| <b>Table S14. Distances [Å] for [PC(sp<sup>3</sup>)HP]Fe(-C<sup>Ar</sup>-N=NPh) (4)</b> .....                                                                                                                                                                                                  | <b>51</b> |
| <b>Table S15. Angles [°] for [PC(sp<sup>3</sup>)HP]Fe(-C<sup>Ar</sup>-N=NPh) (4)</b> .....                                                                                                                                                                                                     | <b>53</b> |

|                                                                                                                                                                                                                                                                                                                                   |           |
|-----------------------------------------------------------------------------------------------------------------------------------------------------------------------------------------------------------------------------------------------------------------------------------------------------------------------------------|-----------|
| Figure S14. Thermal ellipsoid representation of [ $\{\text{PC}(\text{sp}^3)\text{HP}\}\text{Fe}\{-\text{C}(\text{sp}^2)\text{H-CH-Py-}\}$ ] (5) at the 50% probability level. Most hydrogen atoms omitted for clarity.....                                                                                                        | 55        |
| Table S16. Crystal data and structural refinement for [ $\{\text{PC}(\text{sp}^3)\text{HP}\}\text{Fe}\{-\text{C}(\text{sp}^2)\text{H-CH-Py-}\}$ ] (5).....                                                                                                                                                                        | 56        |
| Table S17. Atomic coordinates and equivalent isotropic displacement parameters ( $\text{\AA}^2$ ) for [ $\{\text{PC}(\text{sp}^3)\text{HP}\}\text{Fe}\{-\text{C}(\text{sp}^2)\text{H-CH-Py-}\}$ ] (5). $U(\text{eq})$ is defined as one third of the trace of the orthogonalized $U_{ij}$ tensor.....                             | 57        |
| Table S18. Anisotropic displacement parameters ( $\text{\AA}^2$ ) for [ $\{\text{PC}(\text{sp}^3)\text{HP}\}\text{Fe}\{-\text{C}(\text{sp}^2)\text{H-CH-Py-}\}$ ] (5). The anisotropic displacement factor exponent takes the form: $-2\pi^2[h^2a^{*2}U_{11} + \dots + 2hka^*b^*U_{12}]$ .....                                    | 60        |
| Table S19. Distances [ $\text{\AA}$ ] for [ $\{\text{PC}(\text{sp}^3)\text{HP}\}\text{Fe}\{-\text{C}(\text{sp}^2)\text{H-CH-Py-}\}$ ] (5).....                                                                                                                                                                                    | 62        |
| Table S20. Angles [ $^\circ$ ] for [ $\{\text{PC}(\text{sp}^3)\text{HP}\}\text{Fe}\{-\text{C}(\text{sp}^2)\text{H-CH-Py-}\}$ ] (5).....                                                                                                                                                                                           | 63        |
| <b>3.5 Crystal data for [<math>\{\text{PC}(\text{sp}^3)\text{HP}\}\text{Fe}\{-\text{C}(\text{sp}^2)\text{H-CH-Py-}\}(\text{NC}'\text{Bu})</math>] (6-NC'Bu).</b> ....                                                                                                                                                             | <b>65</b> |
| Figure S15. Thermal ellipsoid representation of [ $\{\text{PC}(\text{sp}^3)\text{HP}\}\text{Fe}\{-\text{C}(\text{sp}^2)\text{H-CH-Py-}\}(\text{NC}'\text{Bu})$ ] (6-NC'Bu).....                                                                                                                                                   | 65        |
| Table S21. Crystal data and refinement for [ $\{\text{PC}(\text{sp}^3)\text{HP}\}\text{Fe}\{-\text{C}(\text{sp}^2)\text{H-CH-Py-}\}(\text{NC}'\text{Bu})$ ] (6-NC'Bu).....                                                                                                                                                        | 66        |
| Table S22. Atomic coordinates and equivalent isotropic displacement parameters ( $\text{\AA}^2$ ) for [ $\{\text{PC}(\text{sp}^3)\text{HP}\}\text{Fe}\{-\text{C}(\text{sp}^2)\text{H-CH-Py-}\}(\text{NC}'\text{Bu})$ ] (6-NC'Bu). $U(\text{eq})$ is defined as one third of the trace of the orthogonalized $U_{ij}$ tensor. .... | 67        |
| Table S23. Anisotropic displacement parameters ( $\text{\AA}^2$ ) for [ $\{\text{PC}(\text{sp}^3)\text{HP}\}\text{Fe}\{-\text{C}(\text{sp}^2)\text{H-CH-Py-}\}(\text{NC}'\text{Bu})$ ] (6-NC'Bu). The anisotropic displacement factor exponent takes the form: $-2\pi^2[h^2a^{*2}U_{11} + \dots + 2hka^*b^*U_{12}]$ .....         | 70        |
| Table S24. Distances [ $\text{\AA}$ ] for [ $\{\text{PC}(\text{sp}^3)\text{HP}\}\text{Fe}\{-\text{C}(\text{sp}^2)\text{H-CH-Py-}\}(\text{NC}'\text{Bu})$ ] (6-NC'Bu). 72                                                                                                                                                          |           |
| Table S25. Angles [ $^\circ$ ] for [ $\{\text{PC}(\text{sp}^3)\text{HP}\}\text{Fe}\{-\text{C}(\text{sp}^2)\text{H-CH-Py-}\}(\text{NC}'\text{Bu})$ ] (6-NC'Bu). ....                                                                                                                                                               | 74        |
| <b>3.6 Crystal data for [<math>\{\text{PC}(\text{sp}^3)\text{HP}\}\text{Fe}\{-\text{C}(\text{sp}^3)\text{H}_2\text{-N}^{quin-}\}</math>] (7)</b> .....                                                                                                                                                                            | <b>77</b> |
| Figure S16. Thermal ellipsoid representation of [ $\{\text{PC}(\text{sp}^3)\text{HP}\}\text{Fe}\{-\text{C}(\text{sp}^3)\text{H}_2\text{-N}^{quin-}\}$ ] (7). .....                                                                                                                                                                | 77        |
| Table S26. Crystal data and structural refinement for [ $\{\text{PC}(\text{sp}^3)\text{HP}\}\text{Fe}\{-\text{C}(\text{sp}^3)\text{H}_2\text{-N}^{quin-}\}$ ] (7).....                                                                                                                                                            | 78        |
| Table S27. Atomic coordinates and equivalent isotropic displacement parameters ( $\text{\AA}^2$ ) for [ $\{\text{PC}(\text{sp}^3)\text{HP}\}\text{Fe}\{-\text{C}(\text{sp}^3)\text{H}_2\text{-N}^{quin-}\}$ ] (7). $U(\text{eq})$ is defined as one third of the trace of the orthogonalized $U_{ij}$ tensor.....                 | 79        |
| Table S28. Anisotropic displacement parameters ( $\text{\AA}^2$ ) for [ $\{\text{PC}(\text{sp}^3)\text{HP}\}\text{Fe}\{-\text{C}(\text{sp}^3)\text{H}_2\text{-N}^{quin-}\}$ ] (7). The anisotropic displacement factor exponent takes the form: $-2\pi^2[h^2a^{*2}U_{11} + \dots + 2hka^*b^*U_{12}]$ .....                        | 82        |
| Table S29. Distances [ $\text{\AA}$ ] for [ $\{\text{PC}(\text{sp}^3)\text{HP}\}\text{Fe}\{-\text{C}(\text{sp}^3)\text{H}_2\text{-N}^{quin-}\}$ ] (7).....                                                                                                                                                                        | 84        |
| Table S30. Angles [ $^\circ$ ] for [ $\{\text{PC}(\text{sp}^3)\text{HP}\}\text{Fe}\{-\text{C}(\text{sp}^3)\text{H}_2\text{-N}^{quin-}\}$ ] (7).....                                                                                                                                                                               | 85        |
| <b>4. References</b> .....                                                                                                                                                                                                                                                                                                        | <b>87</b> |

## 1. Experimental

### 1.1 General Remarks

All experiments were performed under an inert atmosphere of N<sub>2</sub> using standard glovebox techniques unless otherwise specified. Solvents: hexanes, *n*-pentane, diethyl ether, toluene were dried by passing through a column of activated alumina and stored in the glovebox over 3 Å molecular sieves. Hexamethyldisiloxane was degassed under N<sub>2</sub> and then brought into the glovebox and stored over 3 Å molecular sieves. Deuterated solvents: C<sub>6</sub>D<sub>6</sub> and C<sub>6</sub>D<sub>5</sub>CD<sub>3</sub> were dried over calcium hydride followed by filtration and stored in the glovebox over 3 Å molecular sieves. Compounds [ $\{PC(sp^2)P\}Fe(NC^tBu)(N_2)$ ] (**1-NC<sup>t</sup>Bu**),<sup>1</sup> and [ $\{PC(sp^2)P\}Fe(PMe_3)(N_2)$ ] (**1-PMe<sub>3</sub>**)<sup>1</sup> were prepared according to previously reported procedures. Benzophenone and *N*-benzylideneaniline were received from commercial vendors and recrystallized from diethyl ether at -35 °C prior to use. Azobenzene was used as received. All other reagents are commonly available and were used without additional purification. <sup>1</sup>H, <sup>13</sup>C{H}, <sup>31</sup>P{H}, COSY, HSQC, and HMBC spectra were recorded on a Bruker AVANCE DRX 400/500/800 or Varian DirectDrive 600 spectrometers. All chemical shifts are reported in δ units with references to residual solvent resonance of the deuterated solvents for proton and carbon chemical shifts, or to external 85% phosphoric acid for phosphorous chemical shifts.

### 1.2 Synthesis of [ $\{PC(sp^3)HP\}Fe(-C^{Ar}-CH=NPh-)$ ] (**2**)

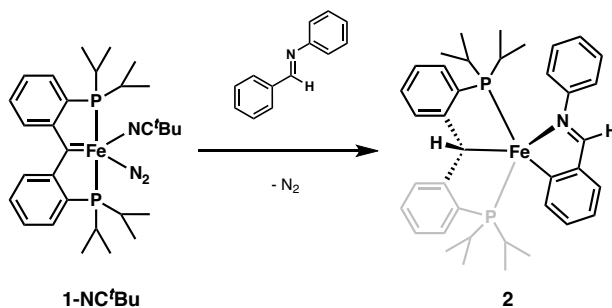

**1-NC<sup>t</sup>Bu** (27 mg, 0.05 mmol, 1.0 eq.) dissolved in 3 mL diethyl ether was added to a 20 mL scintillation vial equipped with a stir bar. *N*-benzylideneaniline (10 mg, 0.055 mmol, 1.1 eq.) dissolved in 2 mL diethyl ether was added to the stirring solution, and precipitation of a green solid was observed immediately. The resulting mixture was stirred at ambient temperature for 10 minutes, before the volatile components were removed under reduced pressure. The green solid was triturated with diethyl ether (10 mL) and then the remaining green solid was dissolved in benzene (10 mL) and filtered through a pad of Celite. The solution was concentrated under reduced pressure, and the concentrated solution was layered with hexanes and analytically pure **2** was obtained after two days at ambient temperature. Yield: 9 mg, 29%.

Data for **2**:  $\mu_{eff} = 5.22 \mu_B$  (Evans).

<sup>1</sup>H NMR (400 MHz, C<sub>6</sub>D<sub>6</sub>, 295 K): δ 69.7 ( $\nu_{1/2} = 157$  Hz), 62.0 ( $\nu_{1/2} = 50.0$  Hz), 35.0 ( $\nu_{1/2} = 15.0$  Hz), 19.9 ( $\nu_{1/2} = 46.7$  Hz), 19.7 ( $\nu_{1/2} = 22.6$  Hz), 15.0 ( $\nu_{1/2} = 20.0$  Hz), 11.3 ( $\nu_{1/2} = 20.0$  Hz), -0.2

( $\nu_{1/2} = 194$  Hz), -1.3 ( $\nu_{1/2} = 37.8$  Hz), -1.8 ( $\nu_{1/2} = 70.1$  Hz), -2.4 ( $\nu_{1/2} = 16.4$  Hz), -5.1 ( $\nu_{1/2} = 181$  Hz), -6.1 ( $\nu_{1/2} = 15.4$  Hz), -7.5 ( $\nu_{1/2} = 97.2$  Hz), -17.2 ( $\nu_{1/2} = 155$  Hz), -107.0 ( $\nu_{1/2} = 112$  Hz).

Anal. (%) Calcd. For  $C_{38}H_{47}FeNP_2$ : C, 71.81; H, 7.45; N, 2.20. Found: C, 71.55; H 8.12; N, 1.89.

### **X-ray crystal structure [ $\{PC(sp^3)HP\}Fe(-C^{Ar}-CH=NPh-)$ ] (2)**

Single crystals were obtained as dark green prisms from a concentrated benzene solution layered with hexamethyldisiloxane at ambient temperature. Crystal and refinement data for **2**:  $C_{38}H_{47}FeNP_2$ ;  $M_r = 635.55$ ; Triclinic; space group P-1;  $a = 9.9760(3)$  Å;  $b = 10.2625(3)$  Å;  $c = 18.1605(5)$  Å;  $\alpha = 85.7430(10)^\circ$ ;  $\beta = 77.0530(10)^\circ$ ;  $\gamma = 63.3690(10)^\circ$ ;  $V = 1619.02(8)$  Å<sup>3</sup>;  $Z = 2$ ;  $T = 120(2)$  K;  $\lambda = 0.71073$  Å;  $\mu = 0.592$  mm<sup>-1</sup>;  $d_{calc} = 1.304$  g.cm<sup>-3</sup>; 57485 reflections collected; 8034 unique ( $R_{int} = 0.0262$ ); giving  $R_1 = 0.0250$ ,  $wR_2 = 0.0655$  for 7558 data with  $[I > 2\sigma(I)]$  and  $R_1 = 0.0268$ ,  $wR_2 = 0.0664$  for all 8034 data. Residual electron density ( $e^- \cdot \text{Å}^{-3}$ ) max/min: 0.380/-0.279.

### 1.3 Synthesis of [ $\{PC(sp^3)HP\}Fe(-C^{Ar}-C^{Bz}=O-)(NC^tBu)$ ] (**3**)

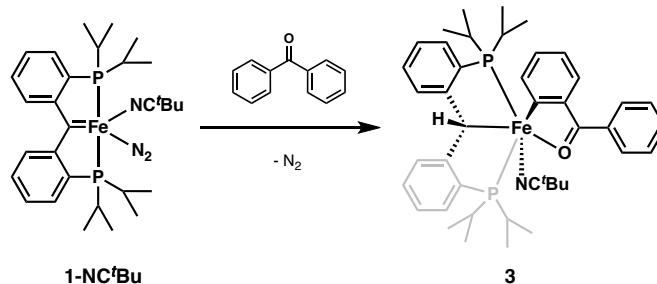

To a 20 mL scintillation vial equipped with a stir bar containing **1-NC<sup>t</sup>Bu** (72 mg, 0.13 mmol, 1.0 eq.), and 3 mL diethyl ether was added a solution of benzophenone (23 mg, 0.13 mmol, 1.0 eq.) in 2 mL diethyl ether. The resulting solution was stirred at ambient temperature for 10 minutes, before the volatile components were removed under reduced pressure. *n*-pentane (10 mL) was added to the resulting residue, and the mixture was stirred for five minutes before removal of the volatile components to yield a blue-green solid. The solid was extracted with *n*-pentane (5 mL) and filtered through a pad of Celite. The solution was concentrated to *ca.* 1 mL, and stored at -35 °C from which analytically pure **3** was obtained overnight. Yield: 36 mg, 39%.

Data for **3**:  $\mu_{\text{eff}} = 4.82 \mu_B$  (Evans).

$^1\text{H NMR}$  (400 MHz,  $\text{C}_6\text{D}_6$ , 295 K):  $\delta$  71.1 ( $\nu_{1/2} = 75$  Hz), 69.6 ( $\nu_{1/2} = 227$  Hz), 29.8 ( $\nu_{1/2} = 40$  Hz), 27.8 ( $\nu_{1/2} = 33$  Hz), 26.1 ( $\nu_{1/2} = 62$  Hz), 25.8 ( $\nu_{1/2} = 61$  Hz), 25.6 ( $\nu_{1/2} = 13$  Hz), 24.7 ( $\nu_{1/2} = 57$  Hz), 23.0 ( $\nu_{1/2} = 44$  Hz), 19.3 ( $\nu_{1/2} = 68$  Hz), 10.3 ( $\nu_{1/2} = 41$  Hz), 0.32 ( $\nu_{1/2} = 75$  Hz), -0.43 ( $\nu_{1/2} = 220\text{Hz}$ ), -1.4 ( $\nu_{1/2} = 80$  Hz), -1.7 ( $\nu_{1/2} = 187$  Hz), -2.2 ( $\nu_{1/2} = 161$  Hz), -4.7 ( $\nu_{1/2} = 52$  Hz), -7.9 ( $\nu_{1/2} = 127$  Hz), -10.7 ( $\nu_{1/2} = 65$  Hz), -22.7 ( $\nu_{1/2} = 220$  Hz), -86.0 ( $\nu_{1/2} = 277$  Hz).

Anal. (%) Calcd. For  $\text{C}_{45}\text{H}_{55}\text{FeNOP}_2$ : C, 71.76; H, 7.70; N, 1.95. Found: C, 72.38; H 8.05; N, 2.14.

#### X-ray crystal structure of [ $\{PC(sp^3)HP\}Fe(-C^{Ar}-C^{Bz}=O-)(NC^tBu)$ ] (**3**).

Single crystals were obtained as dark green blocks from a concentrated diethyl ether solution at ambient temperature. Crystal and refinement data for **3**:  $\text{C}_{45}\text{H}_{55}\text{FeNOP}_2$ ;  $M_r = 719.67$ ; Triclinic; space group P-1;  $a = 9.5332(2)$  Å;  $b = 12.0978(2)$  Å;  $c = 16.7258(3)$  Å;  $\alpha = 86.9350(10)^\circ$ ;  $\beta = 87.9500(10)^\circ$ ;  $\gamma = 77.4270(10)^\circ$ ;  $V = 1879.47(6)$  Å<sup>3</sup>;  $Z = 2$ ;  $T = 296(2)$  K;  $\lambda = 1.54178$  Å;  $\mu = 4.271$  mm<sup>-1</sup>;  $d_{\text{calc}} = 1.272$  g.cm<sup>-3</sup>; 43252 reflections collected; 7091 unique ( $R_{\text{int}} = 0.0382$ ); giving  $R_1 = 0.0563$ ,  $wR_2 = 0.1544$  for 6769 data with  $[I > 2\sigma(I)]$  and  $R_1 = 0.0584$ ,  $wR_2 = 0.1565$  for all 7091 data. Residual electron density ( $\text{e}^- \cdot \text{\AA}^{-3}$ ) max/min: 1.089/-0.747.

#### 1.4 Synthesis of [ $\{\text{PC}(\text{sp}^3)\text{HP}\}\text{Fe}(-\text{C}^{\text{Ar}}-\text{N}=\text{NPh})$ ] (**4**)

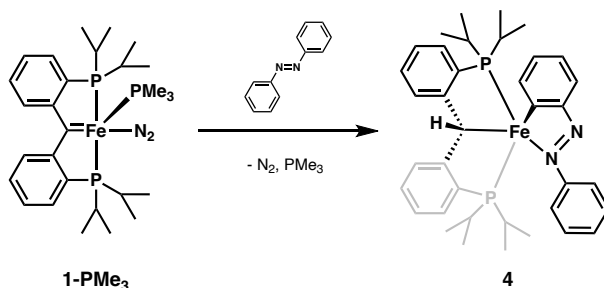

To **1-PMe<sub>3</sub>** (30 mg, 0.054 mmol, 1.0 eq.) dissolved in 2 mL diethyl ether in a 20 mL scintillation vial was added azobenzene (10 mg, 0.55 mmol, 1.0 eq.) in 2 mL diethyl ether. The resulting solution was stirred at ambient temperature for four hours, and then the volatile components were removed under reduced pressure. To the purple residue was added *n*-pentane (10 mL) and the volatile components were removed under reduced pressure to yield a blue solid, which was redissolved in hexamethyldisiloxane (5 mL) and filtered through a pad of Celite. The solution was concentrated under reduced pressure, and the concentrated solution was stored at  $-35^\circ\text{C}$ , from which analytically pure **4** was isolated after one day. Yield: 19 mg, 55%.

Data for **4**:  $\mu_{\text{eff}} = 5.12 \mu_{\text{B}}$  (Evans).

$^1\text{H}$  NMR (400 MHz,  $\text{C}_6\text{D}_6$ , 295 K):  $\delta$  18.4 ( $\nu_{1/2} = 263$  Hz), 10.3 ( $\nu_{1/2} = 39$  Hz), 9.6 ( $\nu_{1/2} = 31$  Hz), 9.0 ( $\nu_{1/2} = 31$  Hz), 8.7 ( $\nu_{1/2} = 25$  Hz), 8.5 ( $\nu_{1/2} = 22$  Hz), 5.1 ( $\nu_{1/2} = 31$  Hz), 3.2 (overlapping signals,  $\nu_{1/2} = 51$  Hz), 0.6 ( $\nu_{1/2} = 42$  Hz), -0.9 ( $\nu_{1/2} = 45$  Hz), -3.0 ( $\nu_{1/2} = 120$  Hz).

Anal. (%) Calcd. For  $\text{C}_{37}\text{H}_{46}\text{FeN}_2\text{P}_2$ : C, 69.81; H, 7.28; N, 4.40. Found: C, 70.06; H 7.51; N, 5.05.

#### X-ray crystal structure of [ $\{\text{PC}(\text{sp}^3)\text{HP}\}\text{Fe}(-\text{C}^{\text{Ar}}-\text{N}=\text{NPh})$ ] (**4**)

Single crystals were obtained as dark purple blocks from a concentrated hexamethyldisiloxane solution at ambient temperature. Crystal and refinement data for **4**:  $\text{C}_{37}\text{H}_{46}\text{FeN}_2\text{P}_2$ ;  $M_r = 636.55$ ; Triclinic; space group P-1;  $a = 10.0838(4)$  Å;  $b = 10.1841(6)$  Å;  $c = 17.5352(7)$  Å;  $\alpha = 89.243(2)^\circ$ ;  $\beta = 88.0700(10)^\circ$ ;  $\gamma = 65.7090(10)^\circ$ ;  $V = 1640.41(13)$  Å<sup>3</sup>;  $Z = 2$ ;  $T = 120(2)$  K;  $\lambda = 1.54178$  Å;  $\mu = 4.811$  mm<sup>-1</sup>;  $d_{\text{calc}} = 1.289$  g.cm<sup>-3</sup>; 29692 reflections collected; 6481 unique ( $R_{\text{int}} = 0.0296$ ); giving  $R_1 = 0.0272$ ,  $wR_2 = 0.0729$  for 6384 data with  $[I > 2\sigma(I)]$  and  $R_1 = 0.0275$ ,  $wR_2 = 0.0732$  for all 6481 data. Residual electron density ( $\text{e}^- \cdot \text{Å}^{-3}$ ) max/min: 0.364/-0.225.

## 1.5 Synthesis of [ $\{PC(sp^3)HP\}Fe\{-C(sp^2)H-CH-Py-\}$ ] (**5**)

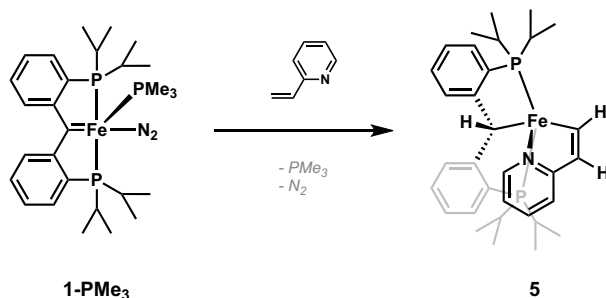

A J-Young NMR tube was charged with [ $\{PC(sp^3)P\}Fe(PMe_3)(N_2)$ ] (55 mg, 0.10 mmol, 1.0 eq.), C<sub>6</sub>D<sub>6</sub> (0.7 mL), and 2-vinylpyridine (12  $\mu$ L, 0.11 mmol, 1.1 eq.). The tube was sealed and heated for two hours in an oil bath, over which time the dark red solution became a dark pink. After the reaction was complete by NMR analysis, the tube was brought back into the drybox, and the contents were transferred to a 20 mL scintillation vial with a stir bar. The volatile components were removed under reduced pressure, and *n*-pentane (10 mL) was added to the pink residue, stirred for five minutes at ambient temperature, and volatile components removed under reduced pressure to yield a pink solid. The solid was dissolved in hexamethyldisiloxane and filtered through a pad of Celite, and concentrated to *ca.* 1 mL under reduced pressure. This concentrated solution was stored at -35 °C overnight, and single crystals of analytically pure **5** were obtained. Yield: 36 mg, 65%.

Data for **5**:  $\mu_{\text{eff}} = 2.98 \mu_B$  (Evans).

<sup>1</sup>H NMR (600 MHz, C<sub>6</sub>D<sub>6</sub>, 295 K):  $\delta$  56.9 ( $\nu_{1/2} = 17.8$  Hz), 52.6 ( $\nu_{1/2} = 23.1$  Hz), 52.4 ( $\nu_{1/2} = 17.0$  Hz), 23.7 ( $\nu_{1/2} = 82$  Hz), 3.60 ( $\nu_{1/2} = 188$  Hz), -0.34 ( $\nu_{1/2} = 186$  Hz), -2.59 ( $\nu_{1/2} = 53$  Hz), -4.32 ( $\nu_{1/2} = 143$  Hz), -9.66 ( $\nu_{1/2} = 105$  Hz), -24.1 ( $\nu_{1/2} = 165$  Hz), -33.3 ( $\nu_{1/2} = 205$  Hz).

X-ray crystal structure of [ $\{PC(sp^3)HP\}Fe\{-C(sp^2)H-CH-Py-\}$ ] (**5**).

Anal. (%) Calcd. For C<sub>32</sub>H<sub>43</sub>FeNP<sub>2</sub>: C, 68.70; H, 7.75; N, 2.50. Found: C, 69.12; H 7.33; N, 3.02.

### X-ray crystal structure of [ $\{PC(sp^3)HP\}Fe\{-C(sp^2)H-CH-Py-\}$ ] (**5**).

Single crystals were obtained as dark pink rhomboids from a concentrated *n*-pentane solution at -35 °C. Crystal and refinement data for **5**: C<sub>32</sub>H<sub>43</sub>FeNP<sub>2</sub>; M<sub>r</sub> = 559.46; Monoclinic; space group P2<sub>1</sub>/c;  $a = 9.7026(3)$  Å;  $b = 19.8324(7)$  Å;  $c = 15.2623(7)$  Å;  $\alpha = 90^\circ$ ;  $\beta = 93.4120(10)^\circ$ ;  $\gamma = 90^\circ$ ;  $V = 2931.66(19)$  Å<sup>3</sup>;  $Z = 4$ ;  $T = 120(2)$  K;  $\lambda = 1.54178$  Å;  $\mu = 5.299$  mm<sup>-1</sup>;  $d_{\text{calc}} = 1.268$  g.cm<sup>-3</sup>; 72837 reflections collected; 5783 unique ( $R_{\text{int}} = 0.0443$ ); giving  $R_1 = 0.0230$ ,  $wR_2 = 0.0589$  for 5542 data with  $[I > 2\sigma(I)]$  and  $R_1 = 0.0244$ ,  $wR_2 = 0.0601$  for all 5783 data. Residual electron density ( $e^- \cdot \text{\AA}^{-3}$ ) max/min: 0.296/-0.186.



## 1.6 Synthesis of $[\{PC(sp^3)HP\}Fe\{-C(sp^2)H-CH-Py-\}(L)]$ (**6**)

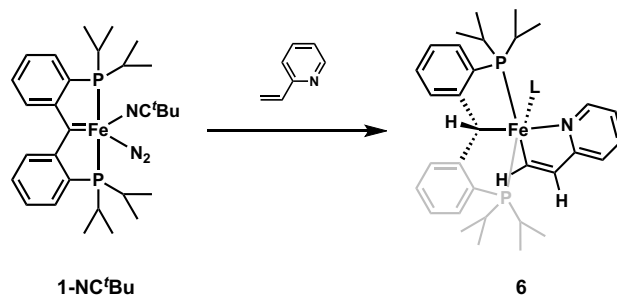

In a 20 mL scintillation vial with a stir bar, **1-NC'Bu** (38 mg, 0.067 mmol, 1.0 eq.) was dissolved in diethyl ether (5 mL). NC'Bu (10  $\mu$ L, 0.09 mmol, 1.3 eq.) was added to the stirring solution, and the mixture was stirred for one minute before addition of 2-vinylpyridine (7  $\mu$ L, 0.065 mmol, 1.0 eq.). The solution became dark cherry-red immediately, alongside concomitant effervescence. The solution was stirred at ambient temperature for 15 minutes, before the volatile components were removed under reduced pressure to yield a red residue. *n*-pentane (10 mL) was added to the residue, and the resulting solution stirred at ambient temperature for five-minutes, before removal of the volatile components to yield a cherry-red solid. The solid was redissolved in *n*-pentane, filtered through a pad of Celite, and concentrated under reduced pressure. This concentrated solution was stored at  $-35^\circ\text{C}$ , from which a 95:5 mixture of **6-NC'Bu** and **6-N<sub>2</sub>** was obtained. Yield: 32 mg, 74%.

Data for **6-NC'Bu**:  $^1\text{H}$  NMR (800 MHz,  $\text{C}_6\text{D}_6$ , 295 K):  $\delta$  11.1 (br. s, 1H,  $-C(sp^2)H-C(sp^2)H-Py$ ), 9.23 (br. s, 1H,  $PyH$ ), 7.72 (br. s, 1H,  $ArH$ ), 7.64 (br. s, 1H,  $-C(sp^2)H-C(sp^2)H-Py$ ), 7.08 (br. s, 6H,  $ArH$ ), 6.93 (br. s, 3H,  $ArH$ ), 6.49 (br. s, 1H,  $ArH$ ), 5.21 (br. s, 1H,  $-C(sp^3)H-$ ), 2.46 (br. s, 4H,  $-CH(CH_3)_2$ ), 1.16 (br. s, 6H,  $-CH(CH_3)_2$ ), 1.08 (br. s, 6H,  $-CH(CH_3)_2$ ), 0.93 (br. s, 6H,  $-CH(CH_3)_2$ ), 0.87 (t,  $J = 7.3$  Hz, 9H,  $-NC(CH_3)_3$ ), 0.71 (obscured, 6H,  $-CH(CH_3)_2$ ).

$^{31}\text{P}\{^1\text{H}\}$  NMR (162 MHz,  $\text{C}_6\text{D}_6$ , 295 K):  $\delta$  65.4 (s, 2P).

$^{13}\text{C}\{^1\text{H}\}$  NMR (151 MHz,  $\text{C}_6\text{D}_6$ , 295 K):  $\delta$  233.7 (t,  $J = 28.5$  Hz,  $-C(sp^2)H-C(sp^2)H-Py$ ), 172.2 (s,  $ArC$ ), 164.6 (t,  $J = 18.2$  Hz,  $ArC$ ), 152.8 (s,  $ArC$ ), 138.7 (t,  $J = 16.1$  Hz,  $ArC$ ), 133.6 (s,  $ArC$ ), 130.3 (overlapping signals:  $-C(sp^2)H-C(sp^2)H-Py$  &  $ArC$ ), 129.2 (s,  $ArC$ ), 128.9 (s,  $ArC$ ), 126.8 (s,  $ArC$ ), 125.2 (s,  $ArC$ ), 121.0 (s,  $ArC$ ), 117.6 (s,  $ArC$ ), 112.6 (s,  $ArC$ ), 34.0 (s,  $ArC$ ), 28.0 (s,  $ArC$ ), 26.2 (s,  $ArC$ ), 20.6 (s,  $ArC$ ), 19.4 (s,  $ArC$ ), 18.8 (s,  $ArC$ ), 17.7 (s,  $ArC$ ).

Anal. (%) Calcd. For  $\text{C}_{37}\text{H}_{52}\text{FeN}_2\text{P}_2$ : C, 69.15; H, 8.16; N, 4.36. Found: C, 69.56; H 7.82; N, 4.12.

### X-ray crystal structure of $[\{PC(sp^3)HP\}Fe\{-C(sp^2)H-CH-Py-\}(NC'Bu)]$ (**6-NC'Bu**).

Single crystals were obtained as dark cherry-red blocks from a concentrated diethyl ether solution at ambient temperature. Crystal and refinement data for **6-NC'Bu**:  $\text{C}_{37}\text{H}_{52}\text{FeN}_2\text{P}_2$ ;  $M_r = 642.59$ ; Monoclinic; space group  $P2_1/n$ ;  $a = 11.2139(8)$  Å;  $b = 16.5390(12)$  Å;  $c = 18.2256(13)$  Å;  $\alpha = 90^\circ$ ;  $\beta = 94.244(3)^\circ$ ;  $\gamma = 90^\circ$ ;  $V = 3371.0(4)$  Å<sup>3</sup>;  $Z = 4$ ;  $T = 120(2)$  K;  $\lambda = 1.54178$  Å;  $\mu = 4.683$  mm<sup>-1</sup>;  $d_{\text{calc}} = 1.266$  g.cm<sup>-3</sup>; 79139 reflections collected; 6880 unique ( $R_{\text{int}} = 0.0613$ ); giving  $R_1 = 0.0257$ ,  $wR_2 = 0.0619$  for 6319 data with  $[I > 2\sigma(I)]$  and  $R_1 = 0.0295$ ,  $wR_2 = 0.0645$  for all 6880 data. Residual electron density ( $e^- \cdot \text{Å}^{-3}$ ) max/min: 0.303/-0.257.

## 1.7 Synthesis of [ $\{PC(sp^3)HP\}Fe\{-C(sp^3)H_2-N^{quin-}\}$ ] (7).

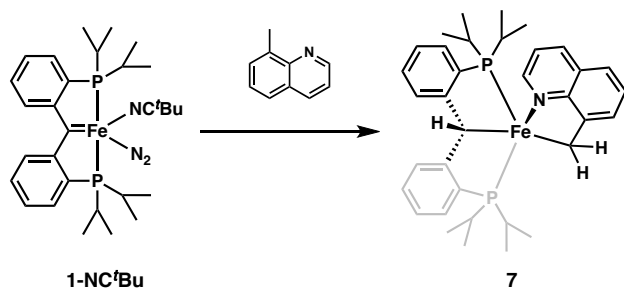

In a 20 mL scintillation vial equipped with a stir bar, 8-methylquinoline (15 mg, 0.10 mmol, 1.1 eq.) in 1 mL diethyl ether was added to **1-NC<sup>t</sup>Bu** (62 mg, 0.11 mmol, 1.0 eq.) dissolved in 2 mL diethyl ether. The resulting solution was stirred at ambient temperature for ten minutes, over which time the dark brown solution became red. The volatile components were removed under reduced pressure, and the dark brown residue was extracted with *n*-pentane (5 mL) and filtered through a pad of Celite. The volatile components were removed under reduced pressure, to yield a brown residue which was recrystallized from a 1:1 *n*-pentane/diethyl ether solution at -35 °C from which **7** was obtained. Despite extensive recrystallization attempts, a small amount of an unidentified paramagnetic product is observed in the <sup>1</sup>H NMR spectrum even of single crystals. Yield: 34 mg, 57%.

Data for **7**:  $\mu_{\text{eff}} = 3.06 \mu_B$

<sup>1</sup>H NMR (800 MHz, C<sub>6</sub>D<sub>6</sub>, 295 K):  $\delta$  63.6 ( $\nu_{1/2} = 72$  Hz), 30.6 ( $\nu_{1/2} = 78$  Hz), 27.4 ( $\nu_{1/2} = 64$  Hz), 24.0 ( $\nu_{1/2} = 110$  Hz), 10.3 ( $\nu_{1/2} = 59$  Hz), 9.5 ( $\nu_{1/2} = 33$  Hz), 3.9 ( $\nu_{1/2} = 39$  Hz), 1.7 ( $\nu_{1/2} = 192$  Hz), -1.3 ( $\nu_{1/2} = 311$  Hz), -3.2 ( $\nu_{1/2} = 114$  Hz), -6.0 ( $\nu_{1/2} = 255$  Hz), -6.8 ( $\nu_{1/2} = 208$  Hz), -8.0 ( $\nu_{1/2} = 365$  Hz), -8.4 ( $\nu_{1/2} = 180$  Hz), -9.6 ( $\nu_{1/2} = 82$  Hz), -10.1 ( $\nu_{1/2} = 197$  Hz), -12.0 ( $\nu_{1/2} = 156.6$  Hz), -17.3 ( $\nu_{1/2} = 137$  Hz), -19.4 ( $\nu_{1/2} = 122$  Hz), -29.1 ( $\nu_{1/2} = 830$  Hz).

Anal. (%) Calcd. for C<sub>35</sub>H<sub>45</sub>FeNP<sub>2</sub>·Et<sub>2</sub>O: C, 69.74; H, 8.25; N, 2.09. Found: C, 69.03; H 8.51; N, 1.34.

### X-ray crystal structure of [ $\{PC(sp^3)HP\}Fe\{-C(sp^3)H_2-N^{quin-}\}$ ] (7)

Single crystals were obtained as red blocks from a concentrated 1:1 *n*-pentane/diethyl ether solution at ambient temperature. Crystal and refinement data for **7**: C<sub>35</sub>H<sub>45</sub>FeNP<sub>2</sub>; M<sub>r</sub> = 597.51; Monoclinic; space group P2<sub>1</sub>/n;  $a = 9.9076(17)$  Å;  $b = 9.9398(19)$  Å;  $c = 31.847(6)$  Å;  $\alpha = 90^\circ$ ;  $\beta = 96.767(6)^\circ$ ;  $\gamma = 90^\circ$ ;  $V = 3114.4(10)$  Å<sup>3</sup>;  $Z = 4$ ;  $T = 229(2)$  K;  $\lambda = 0.71073$  Å;  $\mu = 0.611$  mm<sup>-1</sup>;  $d_{\text{calc}} = 1.274$  g.cm<sup>-3</sup>; 95297 reflections collected; 7755 unique ( $R_{\text{int}} = 0.1011$ ); giving  $R_1 = 0.0539$ ,  $wR_2 = 0.1272$  for 6060 data with [ $I > 2\sigma(I)$ ] and  $R_1 = 0.0724$ ,  $wR_2 = 0.1386$  for all 7755 data. Residual electron density ( $e^- \cdot \text{Å}^{-3}$ ) max/min: 1.516/-0.815.

## 2. NMR Spectra

### 2.1 NMR Spectrum for [ $\{\text{PC}(\text{sp}^3)\text{HP}\}\text{Fe}(-\text{C}^{\text{Ar}}-\text{CH}=\text{NPh}-)$ ] (2)

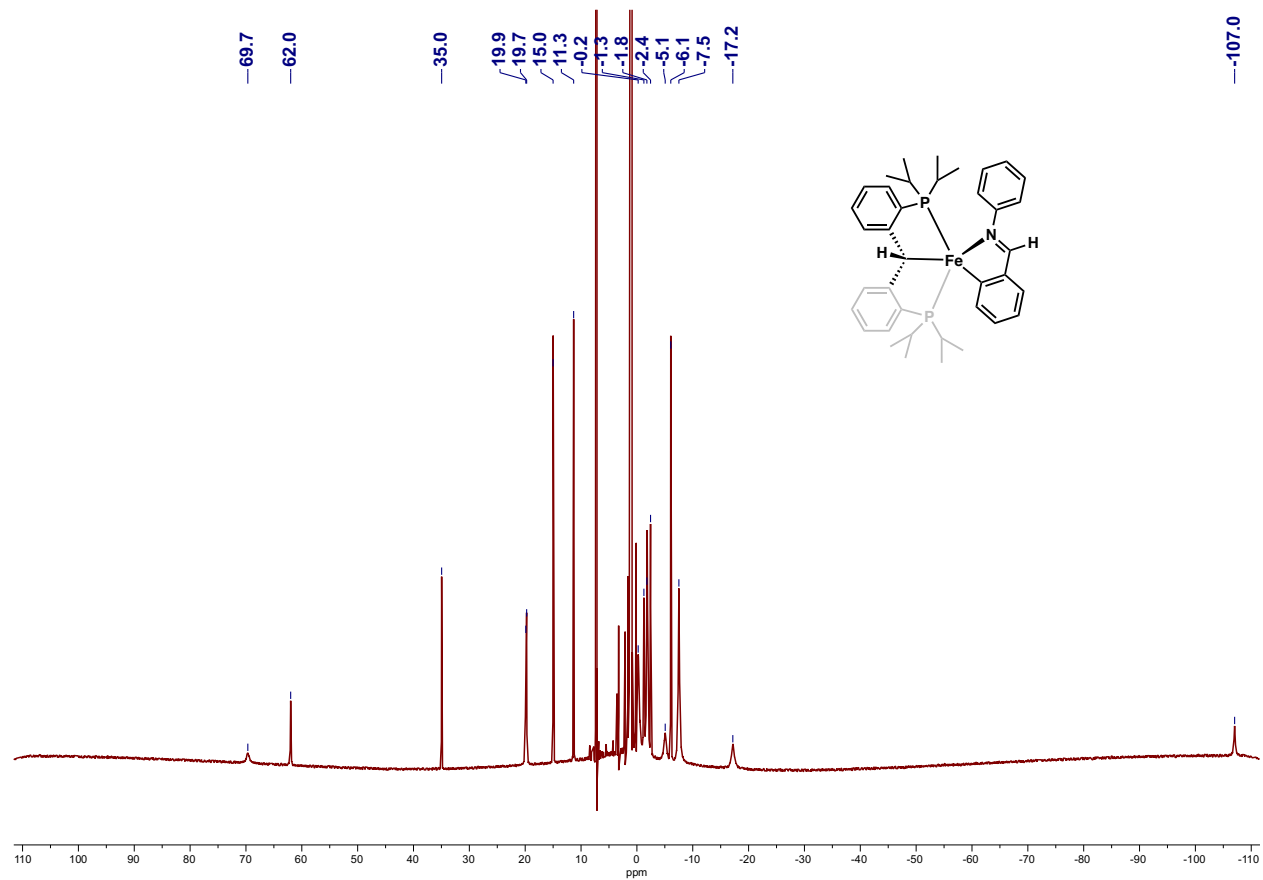

**Figure S1.**  $^1\text{H}$  NMR (400 MHz,  $\text{C}_6\text{D}_6$ , 295 K) spectrum of [ $\{\text{PC}(\text{sp}^3)\text{HP}\}\text{Fe}(-\text{C}^{\text{Ar}}-\text{CH}=\text{NPh}-)$ ] (2).

## 2.2 NMR Spectrum for [ $\{PC(sp^3)HP\}Fe(-C^{Ar}-C^{Bz}=O)(NC^tBu)$ ] (3)

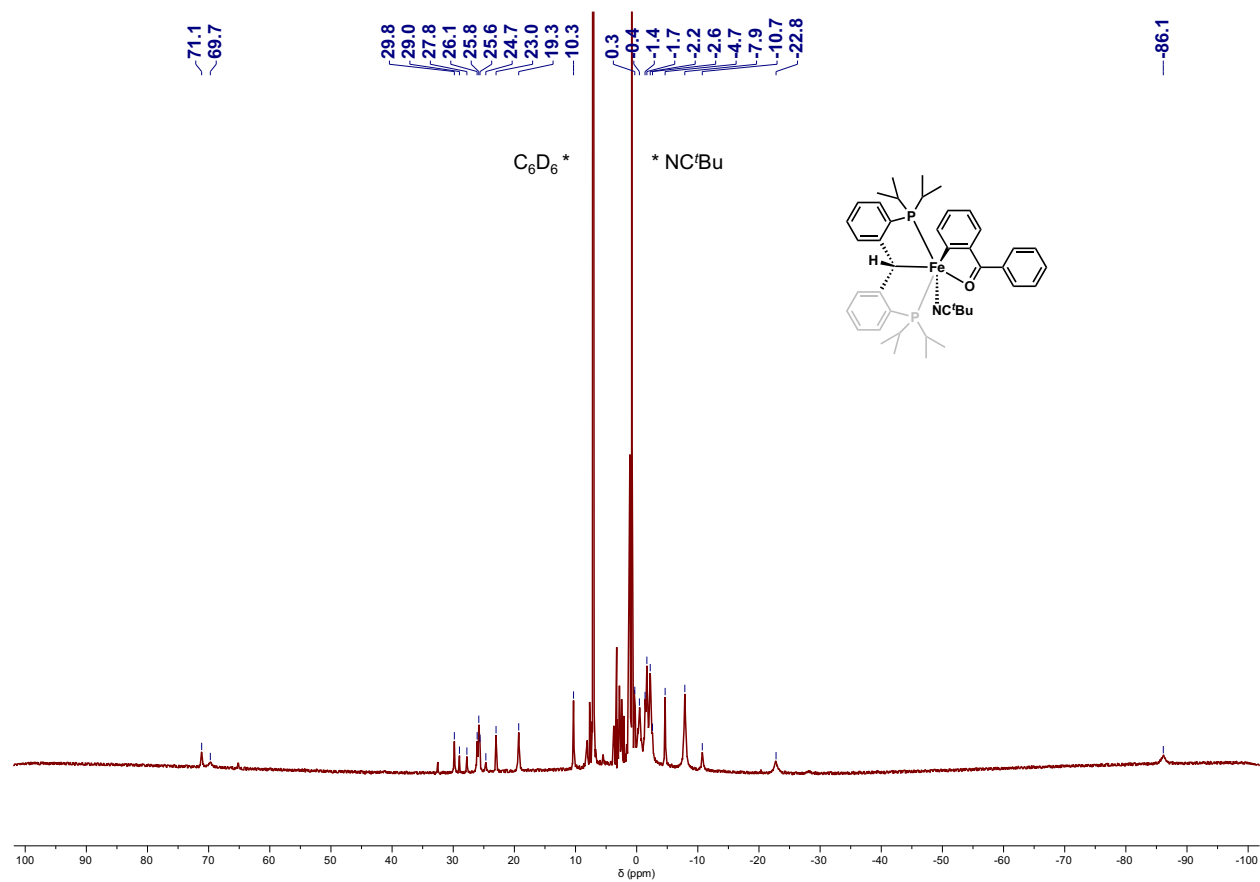

Figure S2.  $^1H$  NMR (400 MHz,  $C_6D_6$ , 295 K) of [ $\{PC(sp^3)HP\}Fe(-C^{Ar}-C^{Bz}=O)(NC^tBu)$ ] (2).

### 2.3 NMR Spectrum for [ $\{\text{PC}(\text{sp}^3)\text{HP}\}\text{Fe}(-\text{C}^{\text{Ar}}-\text{N}=\text{NPh})$ ] (4)

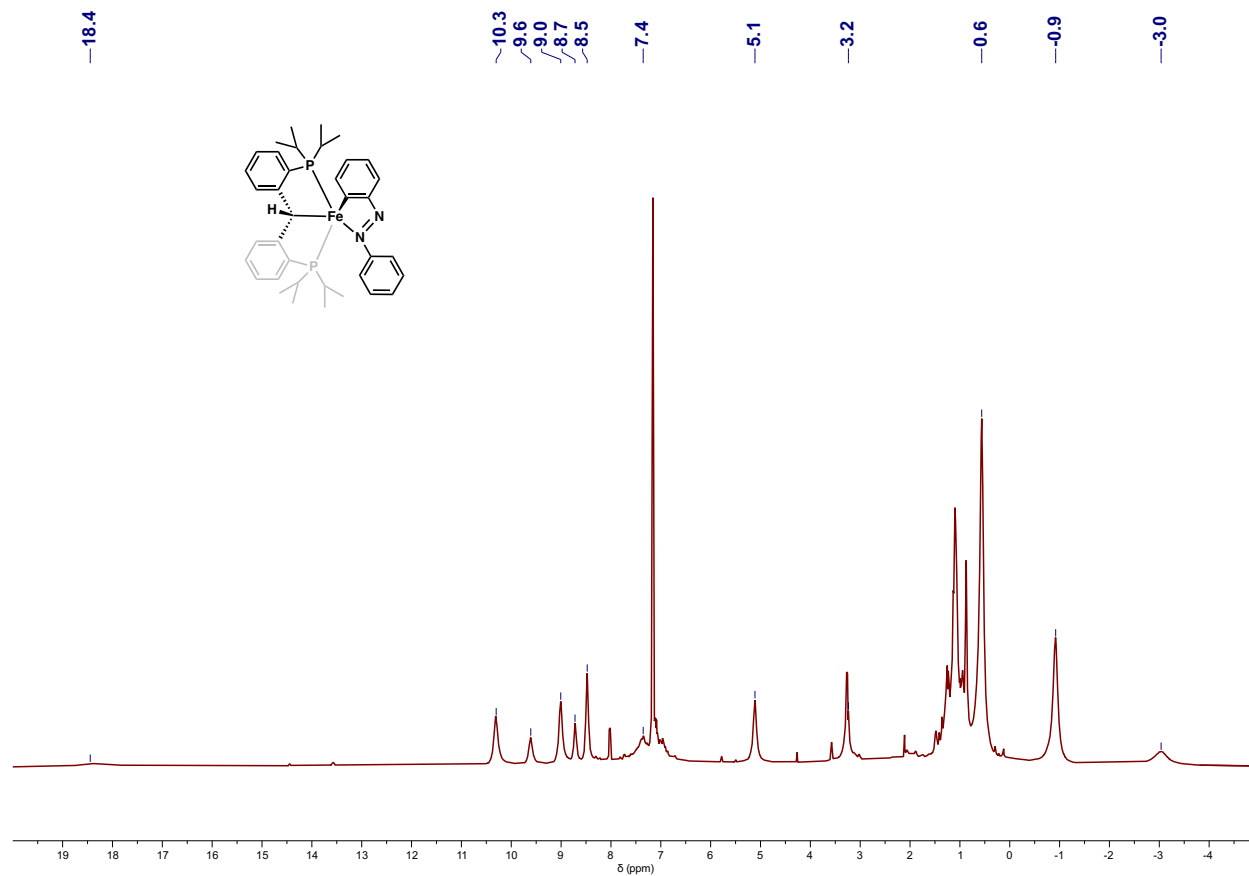

**Figure S3.**  $^1\text{H}$  NMR (400 MHz, C<sub>6</sub>D<sub>6</sub>, 295 K) of [ $\{\text{PC}(\text{sp}^3)\text{HP}\}\text{Fe}(-\text{C}^{\text{Ar}}-\text{N}=\text{NPh}-)$ ] (4).

## 2.4 NMR Spectrum for [ $\{PC(sp^3)HP\}Fe\{-C(sp^2)H-CH-Py-\}$ ] (5)

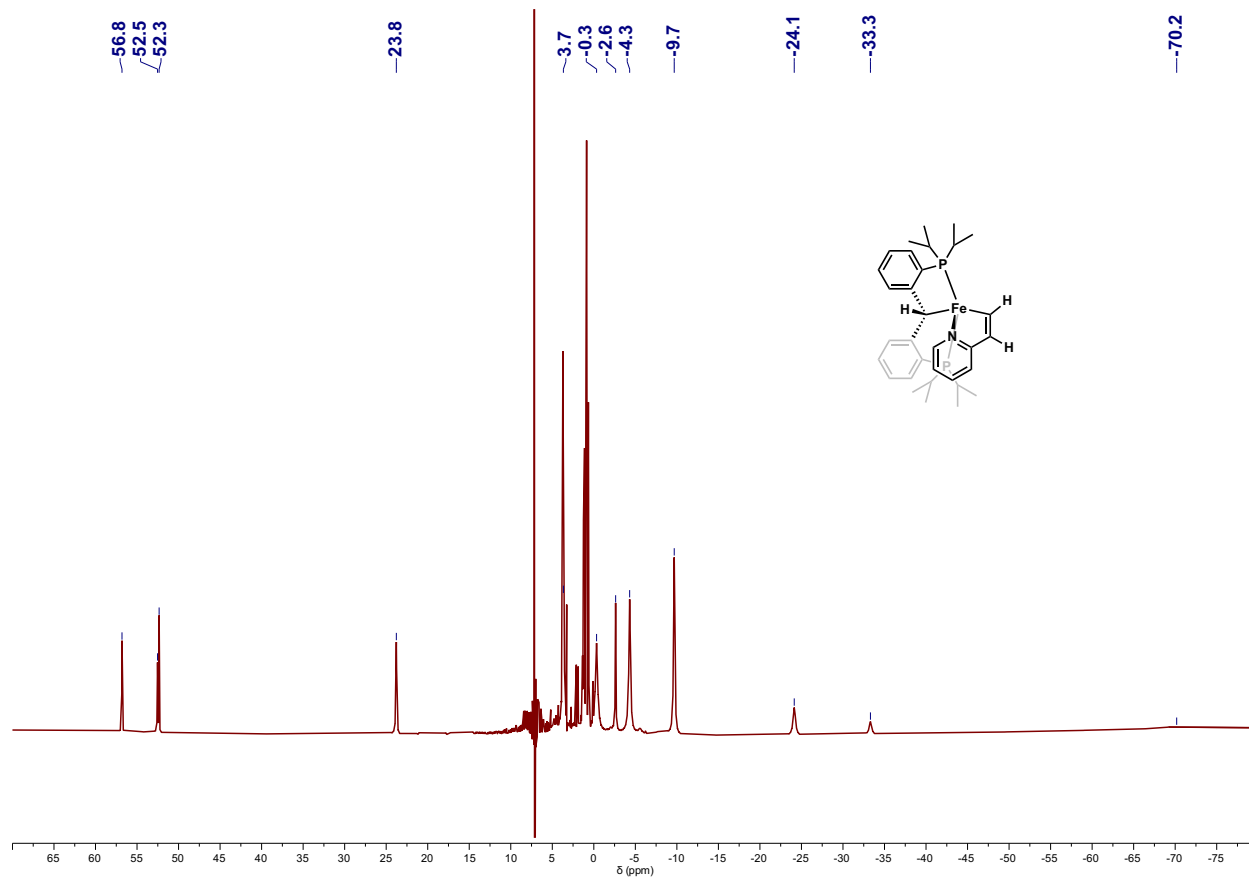

**Figure S4.**  $^1H$  NMR (400 MHz,  $C_6D_6$ , 295 K) of [ $\{PC(sp^3)HP\}Fe\{-C(sp^2)H-CH-Py-\}$ ] (5).

## 2.5 NMR Spectra for [ $\{PC(sp^3)HP\}Fe\{-C(sp^2)H-CH-Py-\}(NC'Bu)$ ] (**6-NC'Bu**)

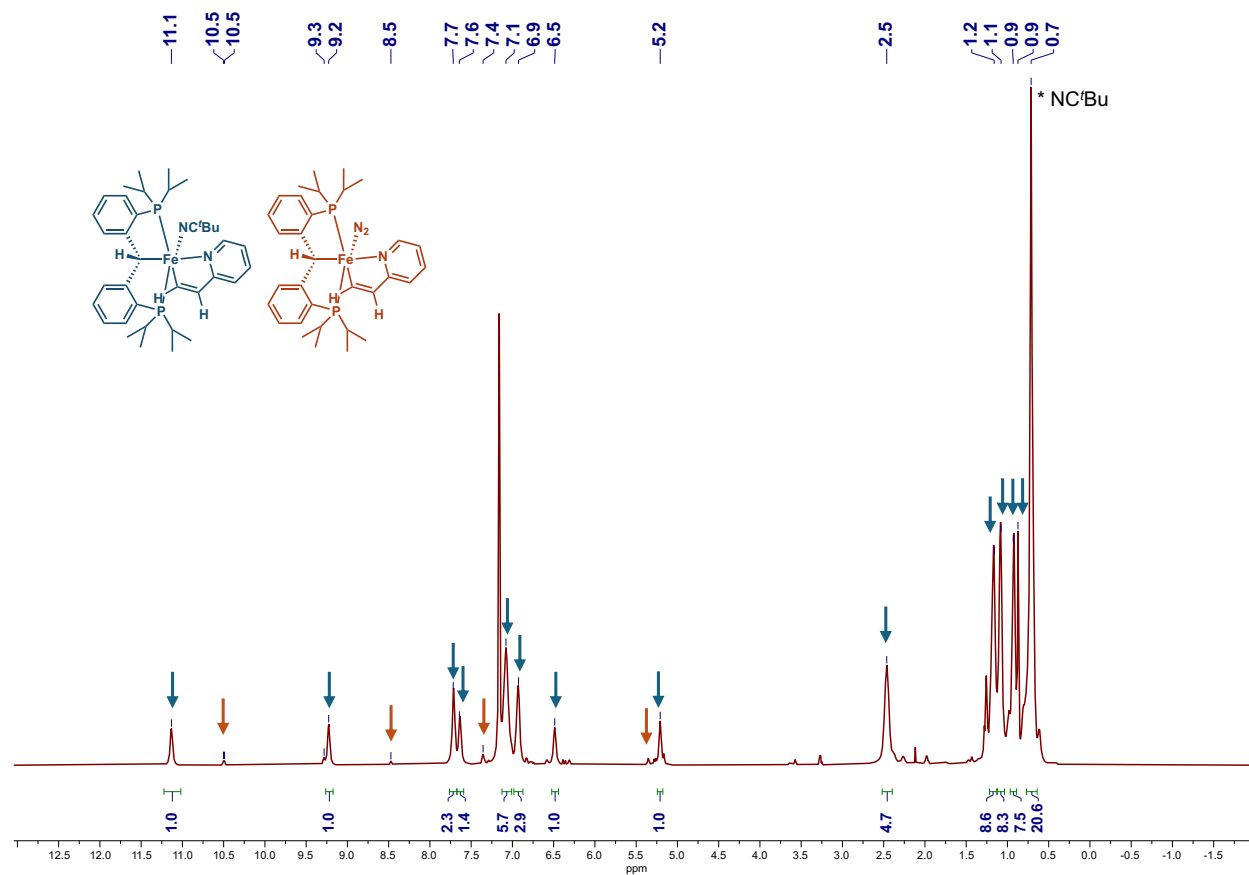

**Figure S5.**  $^1H$  NMR (600 MHz,  $C_6D_6$ , 295 K) of [ $\{PC(sp^3)HP\}Fe\{-C(sp^2)H-CH-Py-\}(L)$ ] (**6-L**). Some signals of **6-N<sub>2</sub>** are obscured and cannot be assigned.

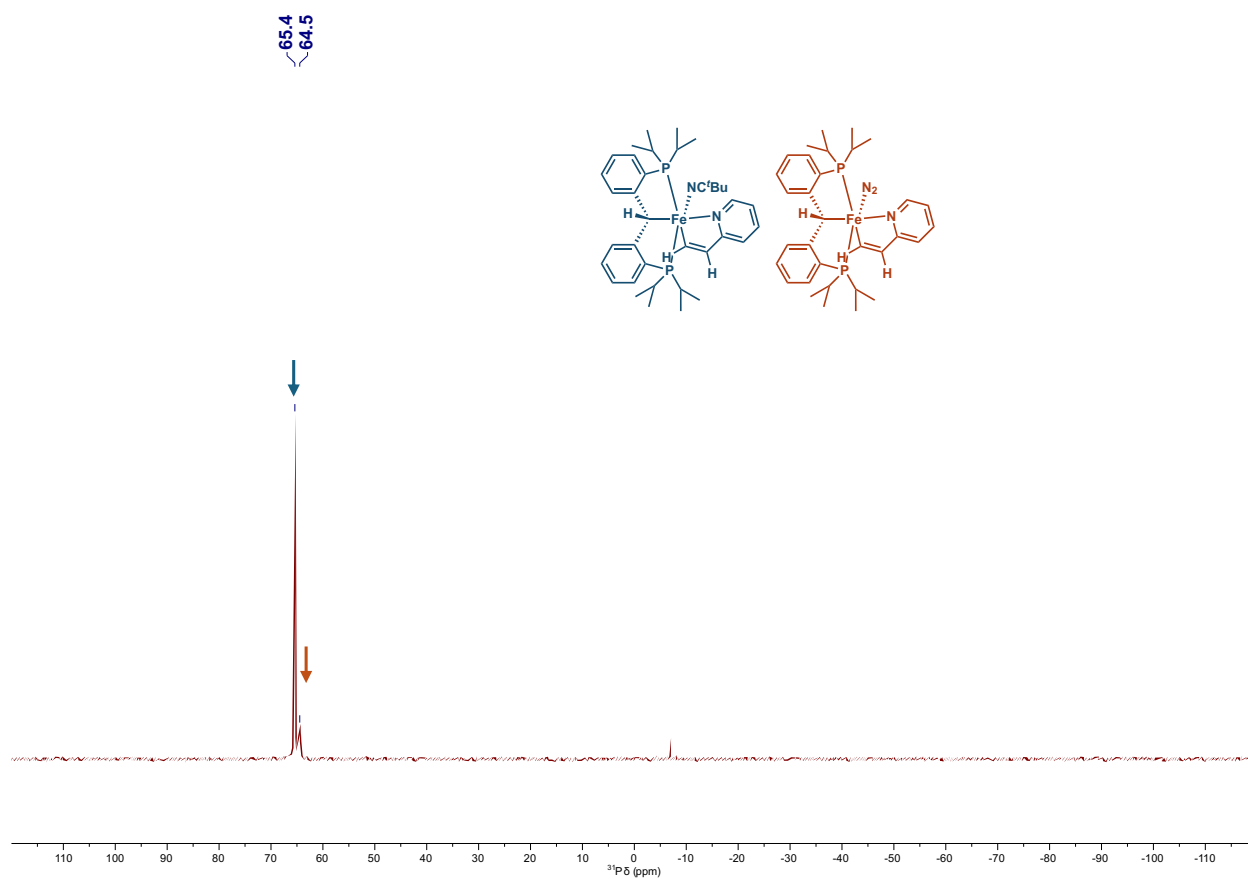

**Figure S6.**  $^{31}\text{P}\{\text{H}\}$  NMR spectrum (162 MHz,  $\text{C}_6\text{D}_6$ , 295 K) of [ $\{\text{PC}(\text{sp}^3)\text{HP}\}\text{Fe}\{-\text{C}(\text{sp}^2)\text{H}-\text{CH}-\text{Py}-\}$ (L)] (**6-L**).



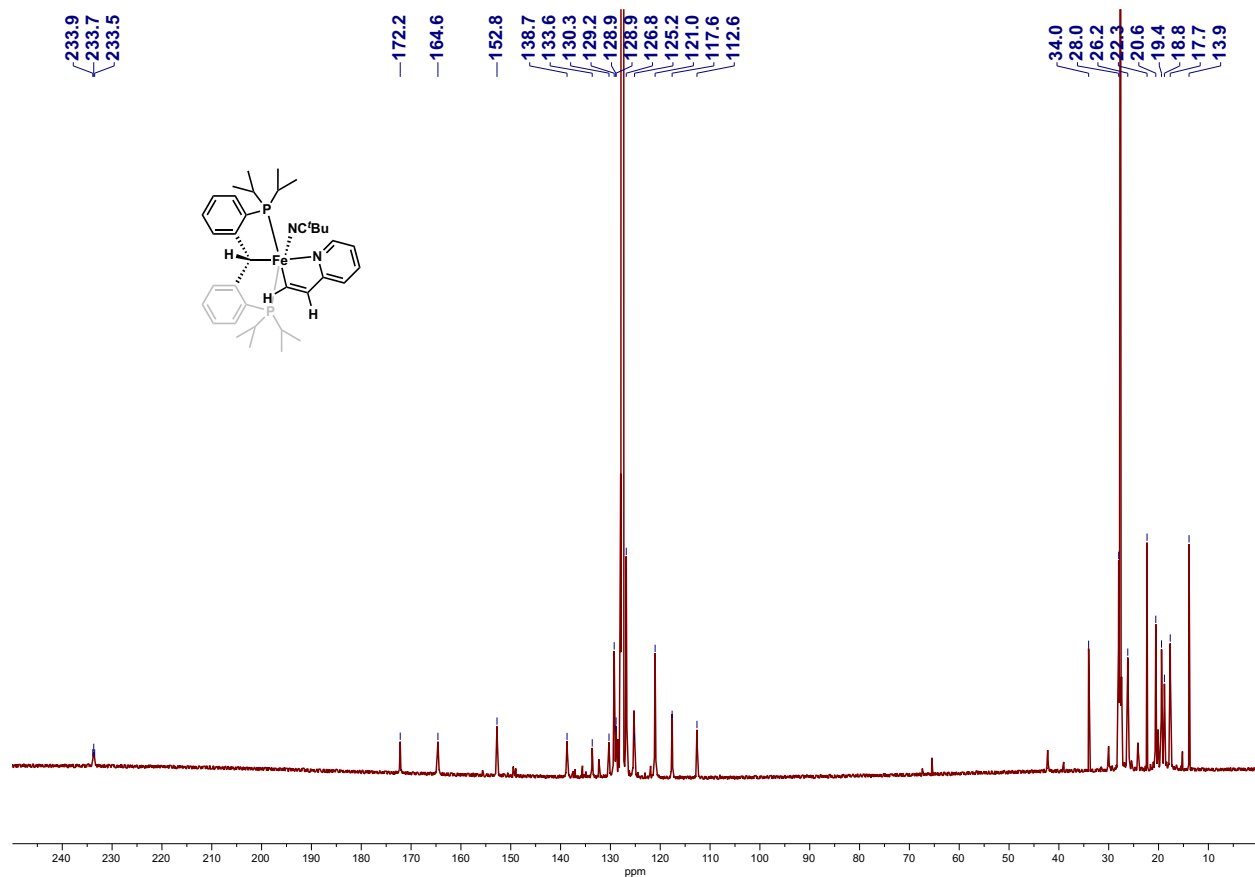

**Figure S7.**  $^{13}\text{C}\{\text{H}\}$  NMR (151 MHz,  $\text{C}_6\text{D}_6$ , 295 K) of  $[\{\text{PC}(\text{sp}^3)\text{HP}\}\text{Fe}\{-\text{C}(\text{sp}^2)\text{H}-\text{CH}-\text{Py}-\}(\text{NC}'\text{Bu})]$  (**6-NC'Bu**).

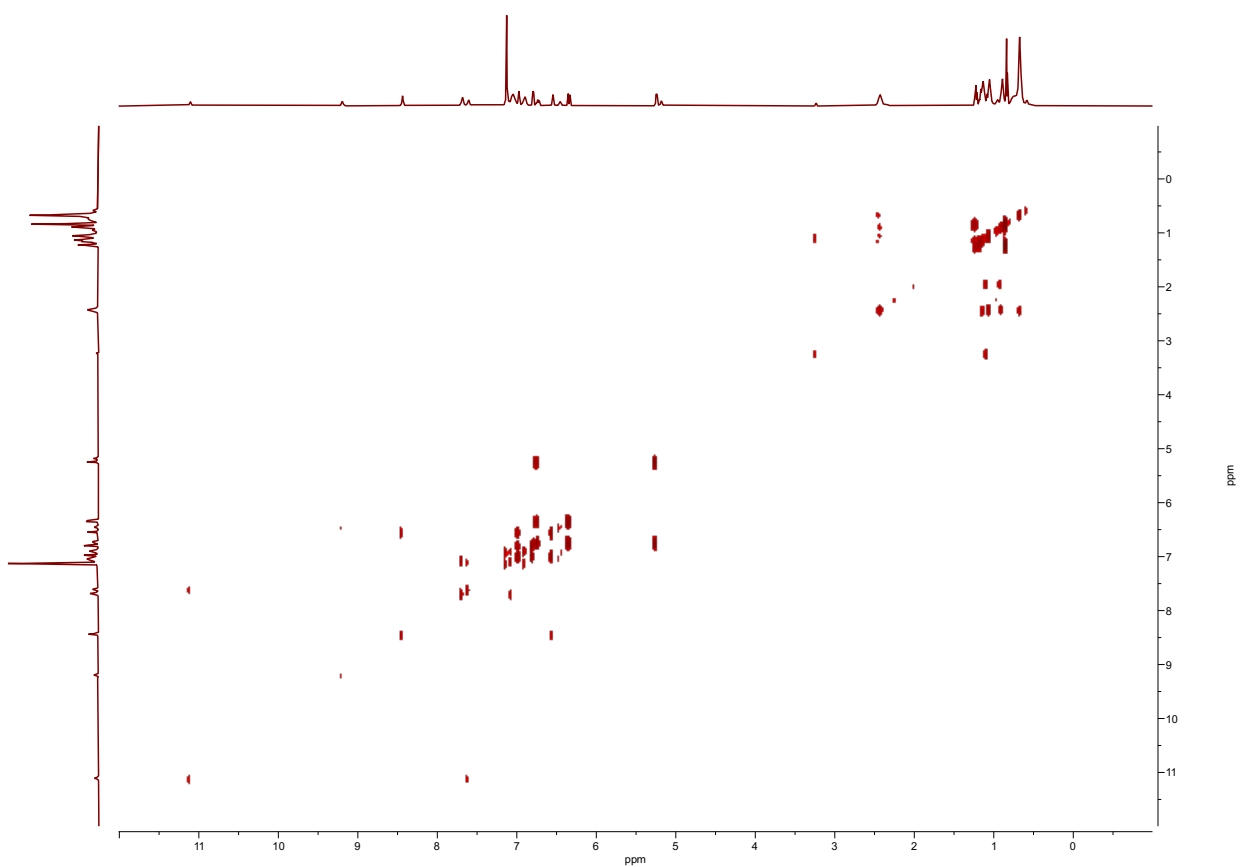

**Figure S8.** COSY NMR spectrum (800 MHz, C<sub>6</sub>D<sub>6</sub>, 295 K) of [ $\{\text{PC}(\text{sp}^3)\text{HP}\}\text{Fe}\{-\text{C}(\text{sp}^2)\text{H}-\text{CH}-\text{Py}-\}(\text{NC}'\text{Bu})$ ] (**6-NC'Bu**).

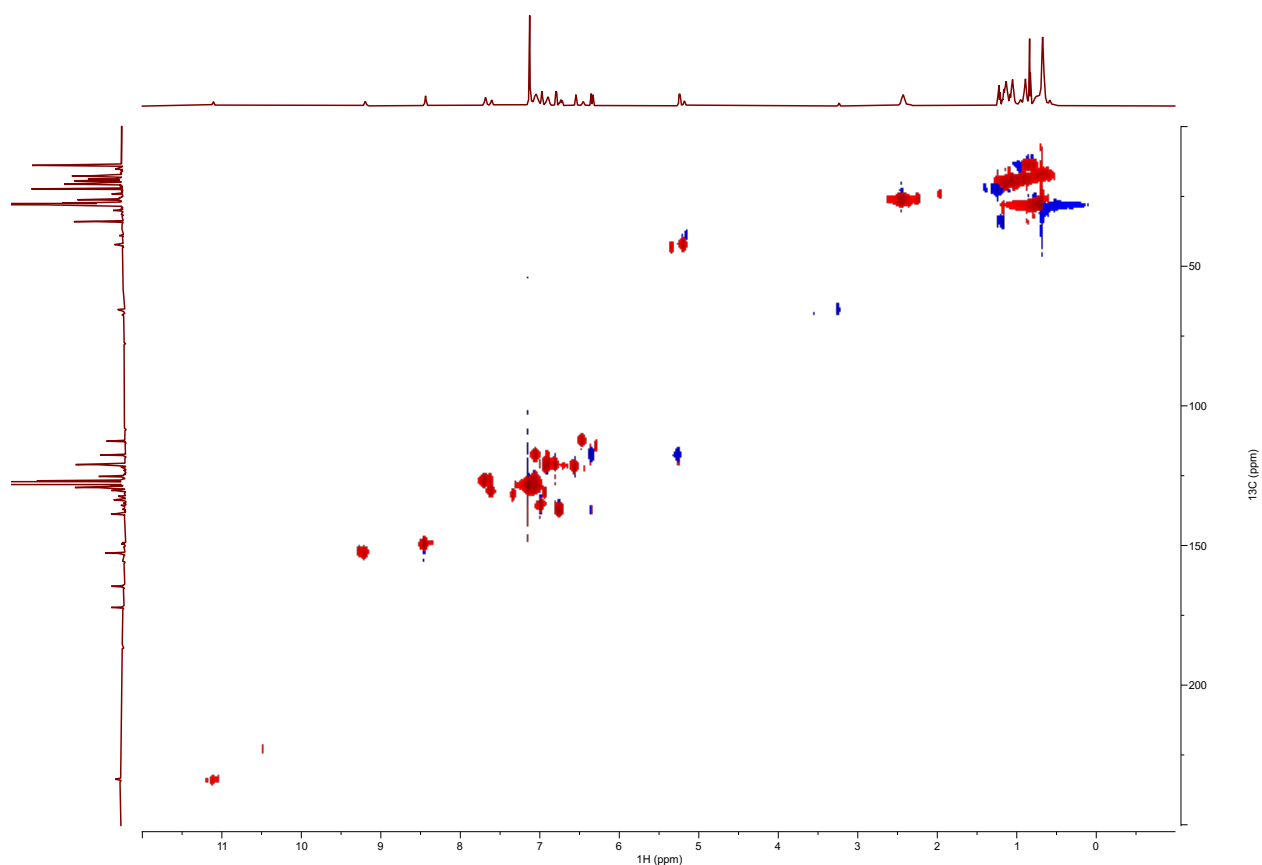

**Figure 9.** HSQC NMR spectrum (800 MHz,  $\text{C}_6\text{D}_6$ , 295 K) of [ $\{\text{PC}(\text{sp}^3)\text{HP}\}\text{Fe}\{-\text{C}(\text{sp}^2)\text{H}-\text{CH}-\text{Py}-\}(\text{NC}'\text{Bu})$ ] (**6-NC'Bu**).

## 2.6. NMR Spectra for [ $\{\text{PC}(\text{sp}^3)\text{HP}\}\text{Fe}\{-\text{C}(\text{sp}^3)\text{H}_2\text{-N}^{quin-}\}$ ] (7)

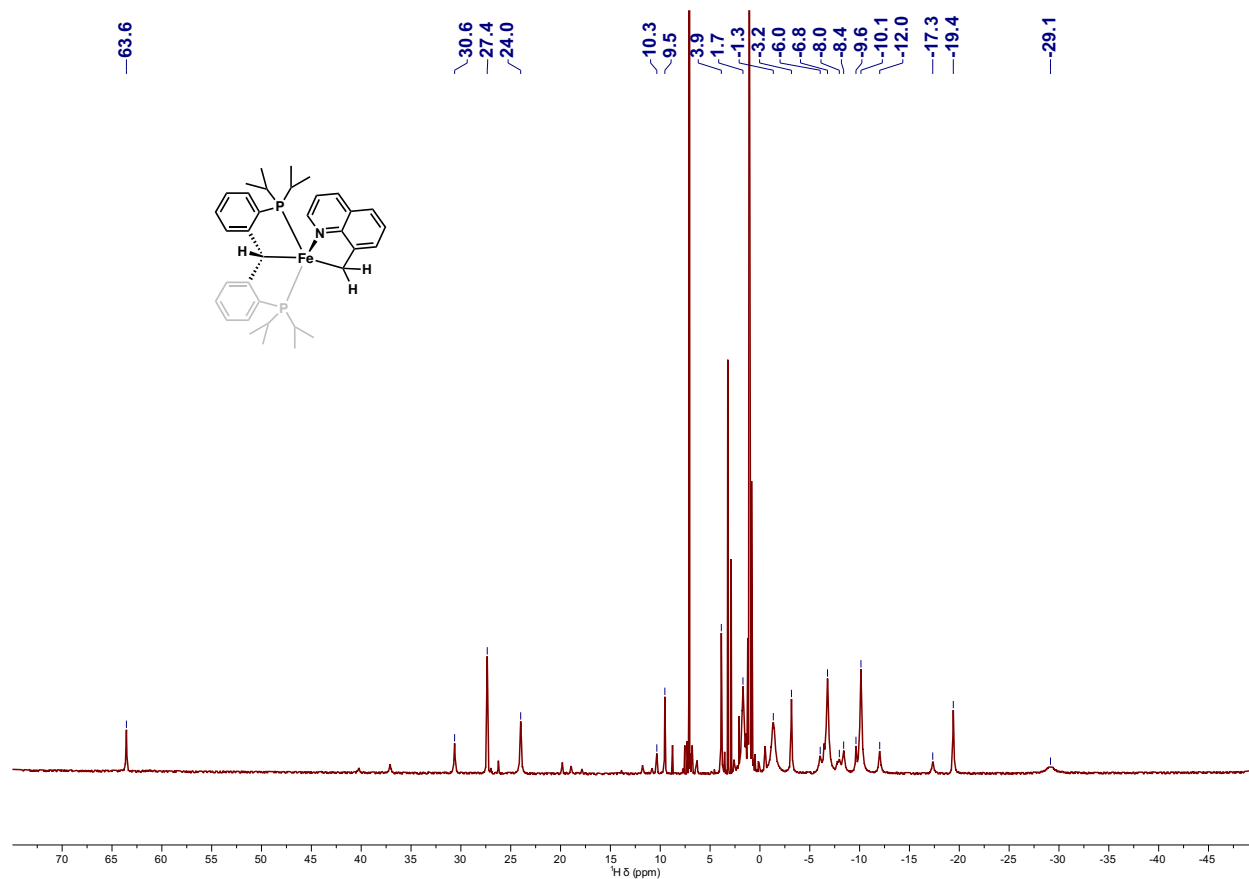

**Figure S10.**  $^1\text{H}$  NMR spectrum (800 MHz,  $\text{C}_6\text{D}_6$ , 295 K) of [ $\{\text{PC}(\text{sp}^3)\text{HP}\}\text{Fe}\{-\text{C}(\text{sp}^3)\text{H}_2\text{-N}^{quin-}\}$ ] (7).

### 3. Crystallographic Tables

#### 3.1 Crystal data for [ $\{\text{PC}(\text{sp}^3)\text{HP}\}\text{Fe}(-\text{C}^{\text{Ar}}-\text{CH}=\text{NPh}-)$ ] (2).

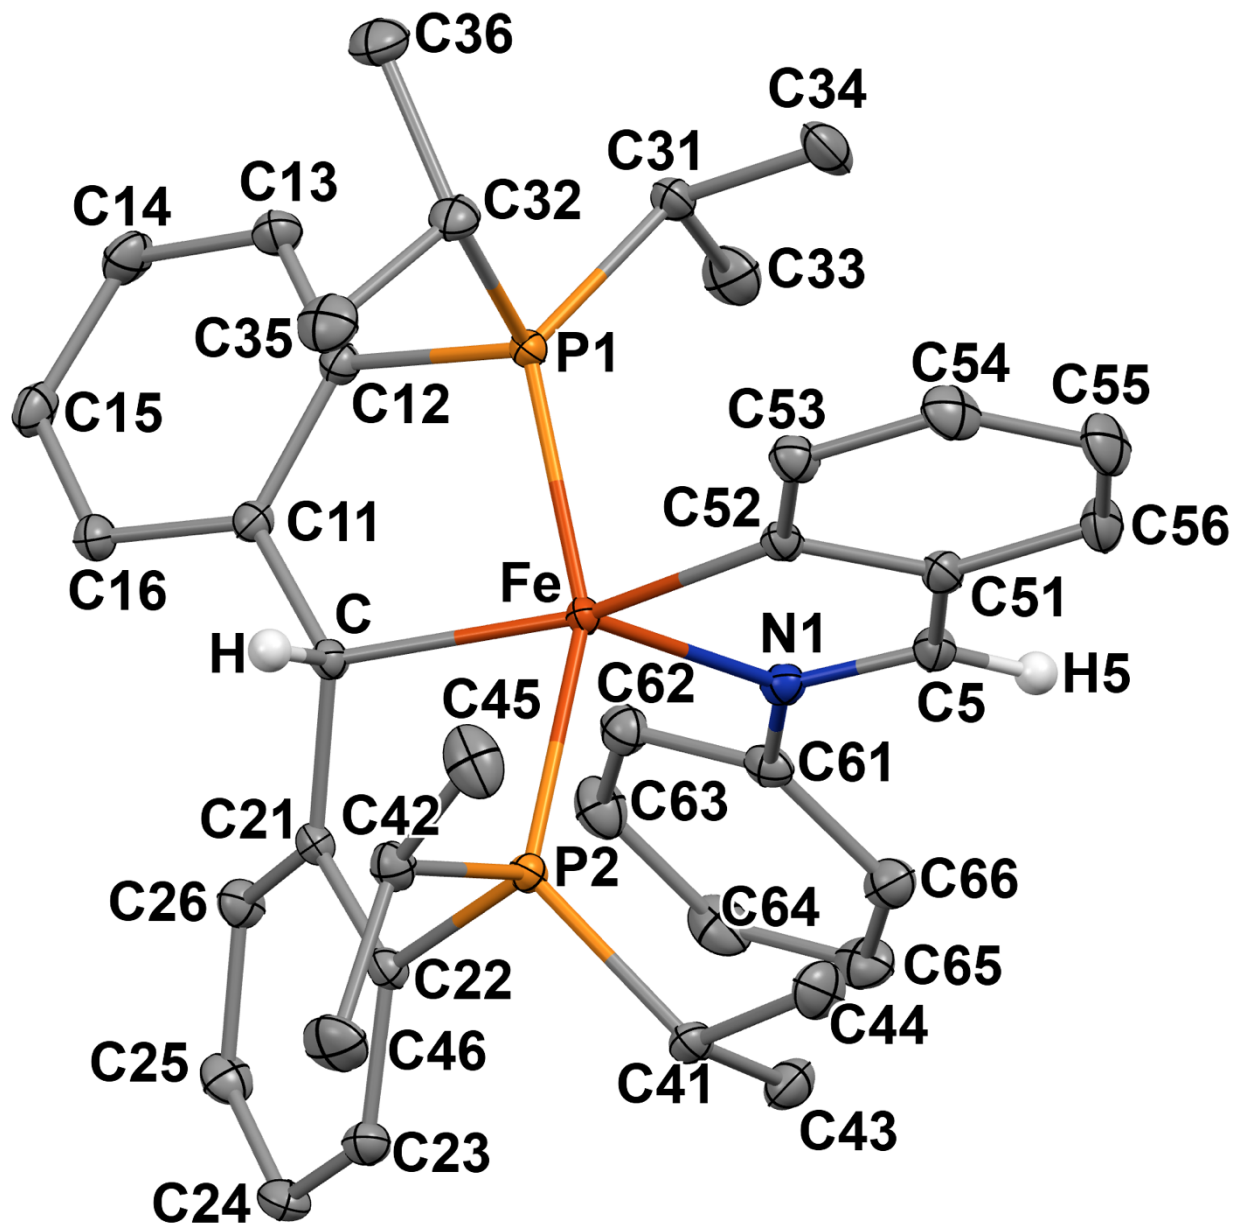

**Figure S11.** Thermal ellipsoid representation of [ $\{\text{PC}(\text{sp}^3)\text{HP}\}\text{Fe}(-\text{C}^{\text{Ar}}-\text{CH}=\text{NPh}-)$ ] (2) at the 50% probability level. Most hydrogen atoms omitted for clarity.

**Table S1.** Crystal data and structural refinement for [ $\{\text{PC}(\text{sp}^3)\text{HP}\}\text{Fe}(-\text{C}^{\text{Ar}}-\text{CH}=\text{NPh}-)$ ] (**2**).

|                                         |                                                                  |
|-----------------------------------------|------------------------------------------------------------------|
| Identification code                     | ZL_VI_102_a                                                      |
| Empirical formula                       | $\text{C}_{38}\text{H}_{47}\text{FeNP}_2$                        |
| Formula weight                          | 635.55                                                           |
| Temperature                             | 120(2) K                                                         |
| Wavelength                              | 0.71073 Å                                                        |
| Crystal system                          | Triclinic                                                        |
| Space group                             | P-1                                                              |
| <i>a</i>                                | 9.9760(3) Å                                                      |
| <i>b</i>                                | 10.2625(3) Å                                                     |
| <i>c</i>                                | 18.1605(5) Å                                                     |
| $\alpha$                                | 85.7430(10)°                                                     |
| $\beta$                                 | 77.0530(10)°                                                     |
| $\gamma$                                | 63.3690(10)°                                                     |
| Volume                                  | 1619.02(8) Å <sup>3</sup>                                        |
| Z                                       | 2                                                                |
| Density (calculated)                    | 1.304 g.cm <sup>-3</sup>                                         |
| Absorption coefficient ( $\mu$ )        | 0.592 mm <sup>-1</sup>                                           |
| F(000)                                  | 676                                                              |
| Crystal size                            | 0.362 × 0.240 × 0.226<br>mm <sup>3</sup>                         |
| $\theta$ range for data collection      | 2.221 to 28.301°                                                 |
| Index ranges                            | -13 ≤ <i>h</i> ≤ 13, -13 ≤ <i>k</i> ≤<br>13, -23 ≤ <i>l</i> ≤ 24 |
| Reflections collected                   | 57485                                                            |
| Independent reflections                 | 8034 [ $R_{\text{int}} = 0.0262$ ]                               |
| Completeness to $\theta = 25.242^\circ$ | 100.0 %                                                          |
| Absorption correction                   | Semi-empirical from<br>equivalents                               |
| Max. and min. transmission              | 0.7457 and 0.7002                                                |
| Refinement method                       | Full-matrix least-<br>squares on $F^2$                           |
| Data / restraints / parameters          | 8034 / 0 / 390                                                   |
| Goodness-of-fit on $F^2$                | 1.047                                                            |
| Final R indices [ $I > 2\sigma(I)$ ]    | $R_1 = 0.0250$ , $wR_2 =$<br>0.0655                              |
| R indices (all data)                    | $R_1 = 0.0268$ , $wR_2 =$<br>0.0664                              |
| Extinction coefficient                  | n/a                                                              |
| Largest diff. peak and hole             | 0.380 and -0.279 e <sup>-</sup> .Å <sup>-3</sup>                 |

**Table S2.** Atomic coordinates and equivalent isotropic displacement parameters ( $\text{\AA}^2$ ) for [ $\{\text{PC}(\text{sp}^3)\text{HP}\}\text{Fe}(\text{-C}^{Ar}\text{-CH=NPh-})$ ] (**2**).  $U(\text{eq})$  is defined as one third of the trace of the orthogonalized  $U_{ij}$  tensor.

| Atom  | x           | y           | z          | $U(\text{eq})$ |
|-------|-------------|-------------|------------|----------------|
| C(11) | 0.32991(12) | 0.60041(12) | 0.34524(6) | 0.012(1)       |
| C(15) | 0.11688(14) | 0.55292(13) | 0.41286(7) | 0.017(1)       |
| Fe    | 0.55383(2)  | 0.72902(2)  | 0.26635(2) | 0.009(1)       |
| P(1)  | 0.39472(3)  | 0.81670(3)  | 0.37676(2) | 0.010(1)       |
| N(1)  | 0.44817(11) | 0.89597(10) | 0.19305(5) | 0.012(1)       |
| C     | 0.47526(12) | 0.56547(12) | 0.28520(6) | 0.011(1)       |
| P(2)  | 0.73633(3)  | 0.55536(3)  | 0.18150(2) | 0.010(1)       |
| C(12) | 0.27201(12) | 0.72419(12) | 0.39278(6) | 0.012(1)       |
| C(13) | 0.13619(13) | 0.76363(13) | 0.44785(7) | 0.016(1)       |
| C(14) | 0.05642(14) | 0.68026(14) | 0.45644(7) | 0.018(1)       |
| C(16) | 0.25316(13) | 0.51210(13) | 0.35917(6) | 0.015(1)       |
| C(21) | 0.48680(12) | 0.50454(11) | 0.20964(6) | 0.011(1)       |
| C(22) | 0.62456(12) | 0.47297(12) | 0.15550(6) | 0.012(1)       |
| C(23) | 0.65412(13) | 0.40283(13) | 0.08669(6) | 0.015(1)       |
| C(24) | 0.54441(14) | 0.37099(13) | 0.06751(7) | 0.016(1)       |
| C(25) | 0.40370(14) | 0.41356(13) | 0.11739(7) | 0.017(1)       |
| C(26) | 0.37496(13) | 0.47894(12) | 0.18739(6) | 0.014(1)       |
| C(5)  | 0.49913(13) | 0.99398(12) | 0.18635(6) | 0.014(1)       |
| C(31) | 0.26052(13) | 1.00970(12) | 0.40406(7) | 0.015(1)       |
| C(32) | 0.50052(14) | 0.75585(13) | 0.45483(6) | 0.016(1)       |
| C(33) | 0.14789(15) | 1.07566(14) | 0.35146(8) | 0.023(1)       |
| C(34) | 0.34772(15) | 1.09930(14) | 0.40661(8) | 0.023(1)       |
| C(35) | 0.61523(15) | 0.59453(14) | 0.44150(7) | 0.022(1)       |
| C(36) | 0.39992(16) | 0.78400(15) | 0.53458(7) | 0.022(1)       |
| C(41) | 0.83688(13) | 0.59165(12) | 0.08903(6) | 0.014(1)       |
| C(42) | 0.88816(13) | 0.40171(12) | 0.22099(6) | 0.014(1)       |
| C(43) | 0.72029(14) | 0.69641(14) | 0.04431(7) | 0.019(1)       |
| C(44) | 0.94445(14) | 0.65535(14) | 0.09870(7) | 0.020(1)       |
| C(45) | 0.98022(15) | 0.45046(14) | 0.25978(8) | 0.024(1)       |
| C(46) | 0.99387(15) | 0.27581(14) | 0.16435(8) | 0.024(1)       |
| C(51) | 0.61350(13) | 0.97557(12) | 0.22760(6) | 0.014(1)       |
| C(52) | 0.66141(12) | 0.84943(12) | 0.27282(6) | 0.012(1)       |
| C(53) | 0.76878(13) | 0.83768(13) | 0.31519(7) | 0.015(1)       |

|        |             |             |            |          |
|--------|-------------|-------------|------------|----------|
| C(54)  | 0.82409(14) | 0.94076(14) | 0.31254(7) | 0.020(1) |
| C(55)  | 0.77450(15) | 1.06281(14) | 0.26776(8) | 0.023(1) |
| C(56)  | 0.66920(14) | 1.08052(13) | 0.22512(7) | 0.019(1) |
| C(61)  | 0.33882(13) | 0.90704(12) | 0.15140(6) | 0.013(1) |
| C(62)  | 0.23562(13) | 0.85122(12) | 0.18328(7) | 0.016(1) |
| C(63)  | 0.12821(14) | 0.85596(14) | 0.14466(7) | 0.020(1) |
| C(64)  | 0.12496(15) | 0.91381(14) | 0.07315(8) | 0.022(1) |
| C(65)  | 0.22804(15) | 0.96893(14) | 0.04079(7) | 0.021(1) |
| C(66)  | 0.33469(14) | 0.96626(13) | 0.07948(7) | 0.017(1) |
| H(15)  | 0.0648      | 0.4935      | 0.4198     | 0.020    |
| H      | 0.5586(17)  | 0.4926(16)  | 0.3067(8)  | 0.016    |
| H(13)  | 0.0985      | 0.8478      | 0.4795     | 0.019    |
| H(14)  | -0.0387     | 0.7100      | 0.4918     | 0.021    |
| H(16)  | 0.2953      | 0.4227      | 0.3313     | 0.018    |
| H(23)  | 0.7502      | 0.3765      | 0.0526     | 0.018    |
| H(24)  | 0.5655      | 0.3211      | 0.0212     | 0.020    |
| H(25)  | 0.3255      | 0.3979      | 0.1036     | 0.020    |
| H(26)  | 0.2777      | 0.5066      | 0.2206     | 0.017    |
| H(5)   | 0.4618      | 1.0753      | 0.1551     | 0.017    |
| H(31)  | 0.1995      | 1.0118      | 0.4562     | 0.019    |
| H(32)  | 0.5619      | 0.8117      | 0.4514     | 0.019    |
| H(33A) | 0.0710      | 1.1737      | 0.3704     | 0.035    |
| H(33B) | 0.0967      | 1.0141      | 0.3497     | 0.035    |
| H(33C) | 0.2038      | 1.0815      | 0.3005     | 0.035    |
| H(34A) | 0.2743      | 1.2015      | 0.4192     | 0.034    |
| H(34B) | 0.4151      | 1.0926      | 0.3572     | 0.034    |
| H(34C) | 0.4096      | 1.0611      | 0.4452     | 0.034    |
| H(35A) | 0.6738      | 0.5630      | 0.4815     | 0.032    |
| H(35B) | 0.6857      | 0.5812      | 0.3923     | 0.032    |
| H(35C) | 0.5596      | 0.5362      | 0.4421     | 0.032    |
| H(36A) | 0.4653      | 0.7447      | 0.5716     | 0.033    |
| H(36B) | 0.3328      | 0.7361      | 0.5392     | 0.033    |
| H(36C) | 0.3372      | 0.8892      | 0.5440     | 0.033    |
| H(41)  | 0.8994      | 0.4973      | 0.0595     | 0.016    |
| H(42)  | 0.8329      | 0.3612      | 0.2616     | 0.017    |
| H(43A) | 0.7736      | 0.7020      | -0.0073    | 0.028    |
| H(43B) | 0.6678      | 0.7935      | 0.0689     | 0.028    |



|        |        |        |         |       |
|--------|--------|--------|---------|-------|
| H(43C) | 0.6448 | 0.6608 | 0.0427  | 0.028 |
| H(44A) | 0.9829 | 0.6871 | 0.0497  | 0.030 |
| H(44B) | 1.0310 | 0.5808 | 0.1182  | 0.030 |
| H(44C) | 0.8883 | 0.7390 | 0.1344  | 0.030 |
| H(45A) | 1.0458 | 0.3685 | 0.2865  | 0.036 |
| H(45B) | 0.9095 | 0.5308 | 0.2959  | 0.036 |
| H(45C) | 1.0443 | 0.4833 | 0.2217  | 0.036 |
| H(46A) | 1.0573 | 0.1919 | 0.1909  | 0.036 |
| H(46B) | 1.0603 | 0.3060 | 0.1263  | 0.036 |
| H(46C) | 0.9319 | 0.2487 | 0.1395  | 0.036 |
| H(53)  | 0.8045 | 0.7564 | 0.3466  | 0.018 |
| H(54)  | 0.8969 | 0.9280 | 0.3417  | 0.024 |
| H(55)  | 0.8127 | 1.1329 | 0.2666  | 0.027 |
| H(56)  | 0.6345 | 1.1629 | 0.1943  | 0.023 |
| H(62)  | 0.2387 | 0.8096 | 0.2318  | 0.019 |
| H(63)  | 0.0567 | 0.8195 | 0.1672  | 0.024 |
| H(64)  | 0.0524 | 0.9156 | 0.0465  | 0.026 |
| H(65)  | 0.2257 | 1.0087 | -0.0081 | 0.025 |
| H(66)  | 0.4047 | 1.0046 | 0.0571  | 0.021 |

---

**Table S3.** Anisotropic displacement parameters ( $\text{\AA}^2$ ) for [ $\{\text{PC}(\text{sp}^3)\text{HP}\}\text{Fe}(-\text{C}^{\text{Ar}}-\text{CH}=\text{NPh}-)$ ] (**2**). The anisotropic displacement factor exponent takes the form:  $-2\pi^2[h^2a^*2U_{11} + \dots + 2hka^*b^*U_{12}]$

| Atom  | $U_{11}$  | $U_{22}$  | $U_{33}$  | $U_{23}$   | $U_{13}$   | $U_{12}$   |
|-------|-----------|-----------|-----------|------------|------------|------------|
| C(11) | 0.0121(5) | 0.0129(5) | 0.0103(5) | 0.0010(4)  | -0.0022(4) | -0.0063(4) |
| C(15) | 0.0183(5) | 0.0211(6) | 0.0159(5) | 0.0033(4)  | -0.0025(4) | -0.0141(5) |
| Fe    | 0.0097(1) | 0.0086(1) | 0.0094(1) | -0.0003(1) | -0.0013(1) | -0.0051(1) |
| P(1)  | 0.0122(1) | 0.0100(1) | 0.0098(1) | -0.0011(1) | -0.0008(1) | -0.0059(1) |
| N(1)  | 0.0116(4) | 0.0123(4) | 0.0111(4) | -0.0003(3) | -0.0015(3) | -0.0043(4) |
| C     | 0.0110(5) | 0.0110(5) | 0.0106(5) | -0.0009(4) | -0.0011(4) | -0.0061(4) |
| P(2)  | 0.0095(1) | 0.0100(1) | 0.0108(1) | -0.0011(1) | -0.0005(1) | -0.0050(1) |
| C(12) | 0.0124(5) | 0.0126(5) | 0.0110(5) | 0.0009(4)  | -0.0018(4) | -0.0066(4) |
| C(13) | 0.0156(5) | 0.0153(5) | 0.0153(5) | -0.0019(4) | 0.0008(4)  | -0.0069(4) |
| C(14) | 0.0147(5) | 0.0215(6) | 0.0161(5) | 0.0011(4)  | 0.0015(4)  | -0.0097(5) |
| C(16) | 0.0184(5) | 0.0155(5) | 0.0133(5) | -0.0002(4) | -0.0016(4) | -0.0105(4) |
| C(21) | 0.0130(5) | 0.0090(5) | 0.0116(5) | -0.0004(4) | -0.0022(4) | -0.0055(4) |
| C(22) | 0.0122(5) | 0.0104(5) | 0.0131(5) | -0.0007(4) | -0.0025(4) | -0.0059(4) |
| C(23) | 0.0153(5) | 0.0150(5) | 0.0133(5) | -0.0024(4) | 0.0001(4)  | -0.0070(4) |
| C(24) | 0.0211(6) | 0.0159(5) | 0.0137(5) | -0.0030(4) | -0.0037(4) | -0.0089(5) |
| C(25) | 0.0175(5) | 0.0186(6) | 0.0180(5) | -0.0008(4) | -0.0065(4) | -0.0102(5) |
| C(26) | 0.0126(5) | 0.0155(5) | 0.0158(5) | -0.0010(4) | -0.0022(4) | -0.0074(4) |
| C(5)  | 0.0165(5) | 0.0115(5) | 0.0128(5) | 0.0010(4)  | -0.0007(4) | -0.0054(4) |
| C(31) | 0.0175(5) | 0.0116(5) | 0.0155(5) | -0.0028(4) | 0.0016(4)  | -0.0067(4) |
| C(32) | 0.0204(6) | 0.0192(6) | 0.0121(5) | 0.0006(4)  | -0.0050(4) | -0.0115(5) |
| C(33) | 0.0217(6) | 0.0150(6) | 0.0250(6) | -0.0004(5) | -0.0042(5) | -0.0020(5) |
| C(34) | 0.0243(6) | 0.0155(6) | 0.0281(7) | -0.0085(5) | 0.0045(5)  | -0.0112(5) |
| C(35) | 0.0226(6) | 0.0224(6) | 0.0185(6) | 0.0036(5)  | -0.0092(5) | -0.0073(5) |
| C(36) | 0.0294(7) | 0.0274(7) | 0.0122(5) | -0.0003(5) | -0.0035(5) | -0.0152(6) |
| C(41) | 0.0138(5) | 0.0148(5) | 0.0124(5) | -0.0020(4) | 0.0016(4)  | -0.0079(4) |
| C(42) | 0.0130(5) | 0.0118(5) | 0.0164(5) | 0.0002(4)  | -0.0029(4) | -0.0043(4) |
| C(43) | 0.0210(6) | 0.0220(6) | 0.0140(5) | 0.0031(4)  | -0.0023(4) | -0.0115(5) |
| C(44) | 0.0171(6) | 0.0244(6) | 0.0223(6) | -0.0012(5) | 0.0013(5)  | -0.0140(5) |
| C(45) | 0.0210(6) | 0.0194(6) | 0.0346(7) | 0.0040(5)  | -0.0155(5) | -0.0083(5) |
| C(46) | 0.0218(6) | 0.0152(6) | 0.0244(6) | -0.0030(5) | -0.0030(5) | 0.0011(5)  |
| C(51) | 0.0144(5) | 0.0126(5) | 0.0139(5) | -0.0014(4) | 0.0009(4)  | -0.0072(4) |
| C(52) | 0.0118(5) | 0.0120(5) | 0.0122(5) | -0.0026(4) | 0.0010(4)  | -0.0065(4) |
| C(53) | 0.0144(5) | 0.0158(5) | 0.0163(5) | -0.0018(4) | -0.0019(4) | -0.0077(4) |
| C(54) | 0.0186(6) | 0.0240(6) | 0.0226(6) | -0.0043(5) | -0.0038(5) | -0.0136(5) |

|       |           |           |           |            |            |            |
|-------|-----------|-----------|-----------|------------|------------|------------|
| C(55) | 0.0259(6) | 0.0220(6) | 0.0280(6) | -0.0025(5) | -0.0021(5) | -0.0186(5) |
| C(56) | 0.0229(6) | 0.0153(5) | 0.0212(6) | 0.0006(4)  | -0.0004(5) | -0.0124(5) |
| C(61) | 0.0122(5) | 0.0106(5) | 0.0140(5) | -0.0012(4) | -0.0038(4) | -0.0021(4) |
| C(62) | 0.0179(5) | 0.0139(5) | 0.0161(5) | 0.0016(4)  | -0.0055(4) | -0.0066(4) |
| C(63) | 0.0199(6) | 0.0179(6) | 0.0259(6) | 0.0013(5)  | -0.0088(5) | -0.0096(5) |
| C(64) | 0.0223(6) | 0.0191(6) | 0.0261(6) | 0.0001(5)  | -0.0141(5) | -0.0063(5) |
| C(65) | 0.0234(6) | 0.0184(6) | 0.0163(5) | 0.0014(4)  | -0.0085(5) | -0.0044(5) |
| C(66) | 0.0165(5) | 0.0158(5) | 0.0156(5) | 0.0011(4)  | -0.0027(4) | -0.0044(4) |

---

**Table S4.** Distances [Å] for [ $\{\text{PC}(\text{sp}^3)\text{HP}\}\text{Fe}(-\text{C}^{\text{Ar}}-\text{CH}=\text{NPh}-)$ ] (2).

| atom-atom    | distance   | atom-atom    | distance   |
|--------------|------------|--------------|------------|
| C(11)-C(16)  | 1.4046(15) | C(11)-C(12)  | 1.4052(15) |
| C(11)-C      | 1.5177(15) | C(15)-C(14)  | 1.3895(17) |
| C(15)-C(16)  | 1.3895(16) | C(15)-H(15)  | 0.9500     |
| Fe-C(52)     | 1.9899(11) | Fe-N(1)      | 2.1188(9)  |
| Fe-C         | 2.1266(10) | Fe-P(1)      | 2.2160(3)  |
| Fe-P(2)      | 2.2599(3)  | P(1)-C(12)   | 1.8236(11) |
| P(1)-C(31)   | 1.8527(12) | P(1)-C(32)   | 1.8607(12) |
| N(1)-C(5)    | 1.3029(15) | N(1)-C(61)   | 1.4216(14) |
| C-C(21)      | 1.5097(14) | C-H          | 0.974(15)  |
| P(2)-C(22)   | 1.8226(11) | P(2)-C(41)   | 1.8581(11) |
| P(2)-C(42)   | 1.8635(11) | C(12)-C(13)  | 1.4005(15) |
| C(13)-C(14)  | 1.3873(16) | C(13)-H(13)  | 0.9500     |
| C(14)-H(14)  | 0.9500     | C(16)-H(16)  | 0.9500     |
| C(21)-C(26)  | 1.3992(15) | C(21)-C(22)  | 1.4153(15) |
| C(22)-C(23)  | 1.3944(15) | C(23)-C(24)  | 1.3909(16) |
| C(23)-H(23)  | 0.9500     | C(24)-C(25)  | 1.3861(17) |
| C(24)-H(24)  | 0.9500     | C(25)-C(26)  | 1.3925(16) |
| C(25)-H(25)  | 0.9500     | C(26)-H(26)  | 0.9500     |
| C(5)-C(51)   | 1.4379(16) | C(5)-H(5)    | 0.9500     |
| C(31)-C(33)  | 1.5285(17) | C(31)-C(34)  | 1.5316(16) |
| C(31)-H(31)  | 1.0000     | C(32)-C(36)  | 1.5294(16) |
| C(32)-C(35)  | 1.5316(17) | C(32)-H(32)  | 1.0000     |
| C(33)-H(33A) | 0.9800     | C(33)-H(33B) | 0.9800     |
| C(33)-H(33C) | 0.9800     | C(34)-H(34A) | 0.9800     |
| C(34)-H(34B) | 0.9800     | C(34)-H(34C) | 0.9800     |
| C(35)-H(35A) | 0.9800     | C(35)-H(35B) | 0.9800     |
| C(35)-H(35C) | 0.9800     | C(36)-H(36A) | 0.9800     |
| C(36)-H(36B) | 0.9800     | C(36)-H(36C) | 0.9800     |
| C(41)-C(44)  | 1.5298(16) | C(41)-C(43)  | 1.5300(16) |
| C(41)-H(41)  | 1.0000     | C(42)-C(46)  | 1.5262(16) |
| C(42)-C(45)  | 1.5310(16) | C(42)-H(42)  | 1.0000     |
| C(43)-H(43A) | 0.9800     | C(43)-H(43B) | 0.9800     |
| C(43)-H(43C) | 0.9800     | C(44)-H(44A) | 0.9800     |
| C(44)-H(44B) | 0.9800     | C(44)-H(44C) | 0.9800     |
| C(45)-H(45A) | 0.9800     | C(45)-H(45B) | 0.9800     |
| C(45)-H(45C) | 0.9800     | C(46)-H(46A) | 0.9800     |
| C(46)-H(46B) | 0.9800     | C(46)-H(46C) | 0.9800     |
| C(51)-C(56)  | 1.4102(15) | C(51)-C(52)  | 1.4290(16) |
| C(52)-C(53)  | 1.4121(15) | C(53)-C(54)  | 1.3891(16) |
| C(53)-H(53)  | 0.9500     | C(54)-C(55)  | 1.3959(19) |
| C(54)-H(54)  | 0.9500     | C(55)-C(56)  | 1.3815(18) |
| C(55)-H(55)  | 0.9500     | C(56)-H(56)  | 0.9500     |
| C(61)-C(62)  | 1.3913(16) | C(61)-C(66)  | 1.4003(16) |
| C(62)-C(63)  | 1.3883(16) | C(62)-H(62)  | 0.9500     |
| C(63)-C(64)  | 1.3882(18) | C(63)-H(63)  | 0.9500     |

|             |            |             |        |
|-------------|------------|-------------|--------|
| C(64)-C(65) | 1.3872(19) | C(64)-H(64) | 0.9500 |
| C(65)-C(66) | 1.3900(17) | C(65)-H(65) | 0.9500 |
| C(66)-H(66) | 0.9500     |             |        |

---

**Table S5.** Angles [°] for [ $\{\text{PC}(\text{sp}^3)\text{HP}\}\text{Fe}(-\text{C}^{\text{Ar}}-\text{CH}=\text{NPh}-)$ ] (2).

| atom-atom-atom      | angle      | atom-atom-atom      | angle       |
|---------------------|------------|---------------------|-------------|
| C(16)-C(11)-C(12)   | 117.36(10) | C(16)-C(11)-C       | 123.98(1)   |
| C(12)-C(11)-C       | 118.58(9)  | C(14)-C(15)-C(16)   | 120.36(11)  |
| C(14)-C(15)-H(15)   | 119.8      | C(16)-C(15)-H(15)   | 119.8       |
| C(52)-Fe-N(1)       | 81.61(4)   | C(52)-Fe-C          | 162.61(4)   |
| N(1)-Fe-C           | 115.67(4)  | C(52)-Fe-P(1)       | 92.21(3)    |
| N(1)-Fe-P(1)        | 101.46(3)  | C-Fe-P(1)           | 82.72(3)    |
| C(52)-Fe-P(2)       | 99.70(3)   | N(1)-Fe-P(2)        | 100.59(3)   |
| C-Fe-P(2)           | 79.81(3)   | P(1)-Fe-P(2)        | 156.229(13) |
| C(12)-P(1)-C(31)    | 104.22(5)  | C(12)-P(1)-C(32)    | 104.10(5)   |
| C(31)-P(1)-C(32)    | 102.70(5)  | C(12)-P(1)-Fe       | 105.48(4)   |
| C(31)-P(1)-Fe       | 127.55(4)  | C(32)-P(1)-Fe       | 110.55(4)   |
| C(5)-N(1)-C(61)     | 120.07(10) | C(5)-N(1)-Fe        | 111.84(7)   |
| C(61)-N(1)-Fe       | 128.05(7)  | C(21)-C-C(11)       | 118.00(9)   |
| C(21)-C-Fe          | 108.67(7)  | C(11)-C-Fe          | 116.57(7)   |
| C(21)-C-H           | 107.1(9)   | C(11)-C-H           | 105.8(9)    |
| Fe-C-H              | 98.4(9)    | C(22)-P(2)-C(41)    | 103.68(5)   |
| C(22)-P(2)-C(42)    | 103.79(5)  | C(41)-P(2)-C(42)    | 105.42(5)   |
| C(22)-P(2)-Fe       | 100.59(4)  | C(41)-P(2)-Fe       | 124.88(4)   |
| C(42)-P(2)-Fe       | 115.62(4)  | C(13)-C(12)-C(11)   | 120.97(10)  |
| C(13)-C(12)-P(1)    | 125.84(9)  | C(11)-C(12)-P(1)    | 113.14(8)   |
| C(14)-C(13)-C(12)   | 120.24(11) | C(14)-C(13)-H(13)   | 119.9       |
| C(12)-C(13)-H(13)   | 119.9      | C(13)-C(14)-C(15)   | 119.42(11)  |
| C(13)-C(14)-H(14)   | 120.3      | C(15)-C(14)-H(14)   | 120.3       |
| C(15)-C(16)-C(11)   | 121.32(11) | C(15)-C(16)-H(16)   | 119.3       |
| C(11)-C(16)-H(16)   | 119.3      | C(26)-C(21)-C(22)   | 117.05(10)  |
| C(26)-C(21)-C       | 126.87(10) | C(22)-C(21)-C       | 116.07(9)   |
| C(23)-C(22)-C(21)   | 120.91(10) | C(23)-C(22)-P(2)    | 126.24(8)   |
| C(21)-C(22)-P(2)    | 112.32(8)  | C(24)-C(23)-C(22)   | 120.69(10)  |
| C(24)-C(23)-H(23)   | 119.7      | C(22)-C(23)-H(23)   | 119.7       |
| C(25)-C(24)-C(23)   | 118.62(10) | C(25)-C(24)-H(24)   | 120.7       |
| C(23)-C(24)-H(24)   | 120.7      | C(24)-C(25)-C(26)   | 121.11(10)  |
| C(24)-C(25)-H(25)   | 119.4      | C(26)-C(25)-H(25)   | 119.4       |
| C(25)-C(26)-C(21)   | 121.17(10) | C(25)-C(26)-H(26)   | 119.4       |
| C(21)-C(26)-H(26)   | 119.4      | N(1)-C(5)-C(51)     | 118.08(10)  |
| N(1)-C(5)-H(5)      | 121.0      | C(51)-C(5)-H(5)     | 121.0       |
| C(33)-C(31)-C(34)   | 111.53(10) | C(33)-C(31)-P(1)    | 110.98(8)   |
| C(34)-C(31)-P(1)    | 111.14(8)  | C(33)-C(31)-H(31)   | 107.7       |
| C(34)-C(31)-H(31)   | 107.7      | P(1)-C(31)-H(31)    | 107.7       |
| C(36)-C(32)-C(35)   | 111.07(10) | C(36)-C(32)-P(1)    | 115.34(9)   |
| C(35)-C(32)-P(1)    | 109.22(8)  | C(36)-C(32)-H(32)   | 106.9       |
| C(35)-C(32)-H(32)   | 106.9      | P(1)-C(32)-H(32)    | 106.9       |
| C(31)-C(33)-H(33A)  | 109.5      | C(31)-C(33)-H(33B)  | 109.5       |
| H(33A)-C(33)-H(33B) | 109.5      | C(31)-C(33)-H(33C)  | 109.5       |
| H(33A)-C(33)-H(33C) | 109.5      | H(33B)-C(33)-H(33C) | 109.5       |
| C(31)-C(34)-H(34A)  | 109.5      | C(31)-C(34)-H(34B)  | 109.5       |

|                     |            |                     |            |
|---------------------|------------|---------------------|------------|
| H(34A)-C(34)-H(34B) | 109.5      | C(31)-C(34)-H(34C)  | 109.5      |
| H(34A)-C(34)-H(34C) | 109.5      | H(34B)-C(34)-H(34C) | 109.5      |
| C(32)-C(35)-H(35A)  | 109.5      | C(32)-C(35)-H(35B)  | 109.5      |
| H(35A)-C(35)-H(35B) | 109.5      | C(32)-C(35)-H(35C)  | 109.5      |
| H(35A)-C(35)-H(35C) | 109.5      | H(35B)-C(35)-H(35C) | 109.5      |
| C(32)-C(36)-H(36A)  | 109.5      | C(32)-C(36)-H(36B)  | 109.5      |
| H(36A)-C(36)-H(36B) | 109.5      | C(32)-C(36)-H(36C)  | 109.5      |
| H(36A)-C(36)-H(36C) | 109.5      | H(36B)-C(36)-H(36C) | 109.5      |
| C(44)-C(41)-C(43)   | 109.42(10) | C(44)-C(41)-P(2)    | 111.83(8)  |
| C(43)-C(41)-P(2)    | 110.28(8)  | C(44)-C(41)-H(41)   | 108.4      |
| C(43)-C(41)-H(41)   | 108.4      | P(2)-C(41)-H(41)    | 108.4      |
| C(46)-C(42)-C(45)   | 111.30(10) | C(46)-C(42)-P(2)    | 113.78(8)  |
| C(45)-C(42)-P(2)    | 113.31(8)  | C(46)-C(42)-H(42)   | 105.9      |
| C(45)-C(42)-H(42)   | 105.9      | P(2)-C(42)-H(42)    | 105.9      |
| C(41)-C(43)-H(43A)  | 109.5      | C(41)-C(43)-H(43B)  | 109.5      |
| H(43A)-C(43)-H(43B) | 109.5      | C(41)-C(43)-H(43C)  | 109.5      |
| H(43A)-C(43)-H(43C) | 109.5      | H(43B)-C(43)-H(43C) | 109.5      |
| C(41)-C(44)-H(44A)  | 109.5      | C(41)-C(44)-H(44B)  | 109.5      |
| H(44A)-C(44)-H(44B) | 109.5      | C(41)-C(44)-H(44C)  | 109.5      |
| H(44A)-C(44)-H(44C) | 109.5      | H(44B)-C(44)-H(44C) | 109.5      |
| C(42)-C(45)-H(45A)  | 109.5      | C(42)-C(45)-H(45B)  | 109.5      |
| H(45A)-C(45)-H(45B) | 109.5      | C(42)-C(45)-H(45C)  | 109.5      |
| H(45A)-C(45)-H(45C) | 109.5      | H(45B)-C(45)-H(45C) | 109.5      |
| C(42)-C(46)-H(46A)  | 109.5      | C(42)-C(46)-H(46B)  | 109.5      |
| H(46A)-C(46)-H(46B) | 109.5      | C(42)-C(46)-H(46C)  | 109.5      |
| H(46A)-C(46)-H(46C) | 109.5      | H(46B)-C(46)-H(46C) | 109.5      |
| C(56)-C(51)-C(52)   | 122.74(11) | C(56)-C(51)-C(5)    | 120.95(11) |
| C(52)-C(51)-C(5)    | 116.26(10) | C(53)-C(52)-C(51)   | 114.93(10) |
| C(53)-C(52)-Fe      | 132.80(9)  | C(51)-C(52)-Fe      | 112.20(8)  |
| C(54)-C(53)-C(52)   | 122.33(11) | C(54)-C(53)-H(53)   | 118.8      |
| C(52)-C(53)-H(53)   | 118.8      | C(53)-C(54)-C(55)   | 121.14(11) |
| C(53)-C(54)-H(54)   | 119.4      | C(55)-C(54)-H(54)   | 119.4      |
| C(56)-C(55)-C(54)   | 119.21(11) | C(56)-C(55)-H(55)   | 120.4      |
| C(54)-C(55)-H(55)   | 120.4      | C(55)-C(56)-C(51)   | 119.63(11) |
| C(55)-C(56)-H(56)   | 120.2      | C(51)-C(56)-H(56)   | 120.2      |
| C(62)-C(61)-C(66)   | 119.33(10) | C(62)-C(61)-N(1)    | 117.64(10) |
| C(66)-C(61)-N(1)    | 122.99(10) | C(63)-C(62)-C(61)   | 120.37(11) |
| C(63)-C(62)-H(62)   | 119.8      | C(61)-C(62)-H(62)   | 119.8      |
| C(64)-C(63)-C(62)   | 120.22(12) | C(64)-C(63)-H(63)   | 119.9      |
| C(62)-C(63)-H(63)   | 119.9      | C(65)-C(64)-C(63)   | 119.75(11) |
| C(65)-C(64)-H(64)   | 120.1      | C(63)-C(64)-H(64)   | 120.1      |
| C(64)-C(65)-C(66)   | 120.39(11) | C(64)-C(65)-H(65)   | 119.8      |
| C(66)-C(65)-H(65)   | 119.8      | C(65)-C(66)-C(61)   | 119.94(11) |
| C(65)-C(66)-H(66)   | 120.0      | C(61)-C(66)-H(66)   | 120.0      |

3.2 Crystal data for [ $\text{PC}(\text{sp}^3)\text{HP}\}\text{Fe}(-\text{C}^{\text{Ar}}-\text{C}^{\text{Bz}}=\text{O})-(\text{NC}^t\text{Bu})$ ] (**3**).

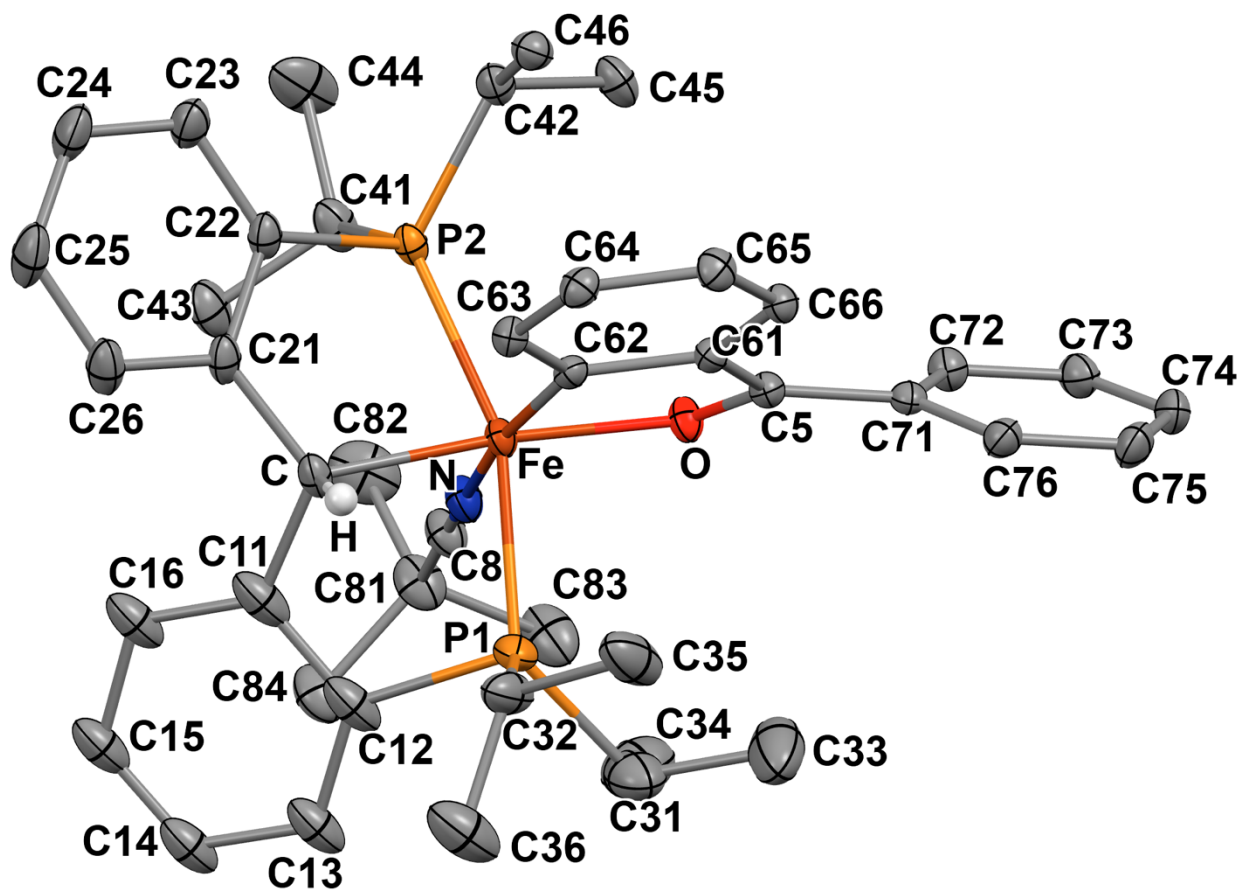

**Figure S12.** Thermal ellipsoid representation of [ $\text{PC}(\text{sp}^3)\text{HP}\}\text{Fe}(-\text{C}^{\text{Ar}}-\text{C}^{\text{Bz}}=\text{O})-(\text{NC}^t\text{Bu})$ ] (**3**) at the 50% probability level. Most hydrogen atoms omitted for clarity.



**Table S6.** Crystal data and structural refinement for [ $\{\text{PC}(\text{sp}^3)\text{HP}\}\text{Fe}(-\text{C}^{\text{Ar}}-\text{C}^{\text{Bz}}=\text{O}-)(\text{NC}^t\text{Bu})$ ] (**3**).

|                                         |                                                               |
|-----------------------------------------|---------------------------------------------------------------|
| Identification code                     | ZL_VI_013_a                                                   |
| Empirical formula                       | $\text{C}_{43}\text{H}_{55}\text{FeNOP}_2$                    |
| Formula weight                          | 719.67                                                        |
| Temperature                             | 296(2) K                                                      |
| Wavelength                              | 1.54178 Å                                                     |
| Crystal system                          | Triclinic                                                     |
| Space group                             | P-1                                                           |
| <i>a</i>                                | 9.5332(2) Å                                                   |
| <i>b</i>                                | 12.0978(2) Å                                                  |
| <i>c</i>                                | 16.7258(3) Å                                                  |
| $\alpha$                                | 86.9350(10)°                                                  |
| $\beta$                                 | 87.9500(10)°                                                  |
| $\gamma$                                | 77.4270(10)°                                                  |
| Volume                                  | 1879.47(6) Å <sup>3</sup>                                     |
| <i>Z</i>                                | 2                                                             |
| Density (calculated)                    | 1.272 g.cm <sup>-3</sup>                                      |
| Absorption coefficient ( $\mu$ )        | 4.271 mm <sup>-1</sup>                                        |
| F(000)                                  | 768                                                           |
| Crystal size                            | 0.192 × 0.153 × 0.114 mm <sup>3</sup>                         |
| $\theta$ range for data collection      | 2.646 to 72.038°                                              |
| Index ranges                            | -11 ≤ <i>h</i> ≤ 11, -14 ≤ <i>k</i> ≤ 14, -19 ≤ <i>l</i> ≤ 19 |
| Reflections collected                   | 43252                                                         |
| Independent reflections                 | 7091 [ $R_{\text{int}} = 0.0382$ ]                            |
| Completeness to $\theta = 67.679^\circ$ | 96.8 %                                                        |
| Absorption correction                   | Semi-empirical from equivalents                               |
| Max. and min. transmission              | 0.7535 and 0.5981                                             |
| Refinement method                       | Full-matrix least-squares on $F^2$                            |
| Data / restraints / parameters          | 7091 / 0 / 417                                                |
| Goodness-of-fit on $F^2$                | 1.106                                                         |
| Final R indices [ $I > 2\sigma(I)$ ]    | $R_1 = 0.0563$ , $wR_2 = 0.1544$                              |
| R indices (all data)                    | $R_1 = 0.0584$ , $wR_2 = 0.1565$                              |
| Extinction coefficient                  | n/a                                                           |
| Largest diff. peak and hole             | 1.089 and -0.747 e <sup>-</sup> .Å <sup>-3</sup>              |

**Table S7.** Atomic coordinates and equivalent isotropic displacement parameters ( $\text{\AA}^2$ ) for [ $\{\text{PC}(\text{sp}^3)\text{HP}\}\text{Fe}(-\text{C}^{\text{Ar}}-\text{C}^{\text{Bz}}=\text{O}-)(\text{NC}^t\text{Bu})$ ] (**3**).  $U(\text{eq})$  is defined as one third of the trace of the orthogonalized  $U_{ij}$  tensor.

| Atom  | x           | y           | z           | U(eq)    |
|-------|-------------|-------------|-------------|----------|
| Fe    | 0.27591(4)  | 0.74344(3)  | 0.25182(2)  | 0.021(1) |
| P(1)  | 0.12189(10) | 0.64591(7)  | 0.31683(5)  | 0.036(1) |
| O     | 0.3786(2)   | 0.76648(16) | 0.34784(12) | 0.025(1) |
| N     | 0.4142(3)   | 0.5999(2)   | 0.24184(16) | 0.029(1) |
| C     | 0.1385(3)   | 0.7230(3)   | 0.16084(17) | 0.025(1) |
| P(2)  | 0.38678(7)  | 0.82056(6)  | 0.15108(4)  | 0.022(1) |
| C(5)  | 0.3221(3)   | 0.8523(2)   | 0.38773(16) | 0.022(1) |
| C(8)  | 0.4989(3)   | 0.5165(3)   | 0.2377(2)   | 0.032(1) |
| C(11) | 0.1301(4)   | 0.6004(3)   | 0.1610(3)   | 0.045(1) |
| C(12) | 0.1133(4)   | 0.5490(3)   | 0.2380(3)   | 0.045(1) |
| C(13) | 0.1017(4)   | 0.4362(3)   | 0.2478(3)   | 0.045(1) |
| C(14) | 0.1086(4)   | 0.3708(3)   | 0.1812(3)   | 0.045(1) |
| C(15) | 0.1256(4)   | 0.4186(3)   | 0.1071(3)   | 0.045(1) |
| C(16) | 0.1370(4)   | 0.5339(3)   | 0.0953(3)   | 0.045(1) |
| C(21) | 0.1524(3)   | 0.7859(3)   | 0.08128(17) | 0.028(1) |
| C(22) | 0.2591(3)   | 0.8487(3)   | 0.07081(17) | 0.027(1) |
| C(23) | 0.2682(4)   | 0.9164(3)   | 0.00110(19) | 0.036(1) |
| C(24) | 0.1720(4)   | 0.9207(4)   | -0.0595(2)  | 0.044(1) |
| C(25) | 0.0656(4)   | 0.8585(4)   | -0.0501(2)  | 0.045(1) |
| C(26) | 0.0548(3)   | 0.7926(3)   | 0.01942(19) | 0.038(1) |
| C(31) | 0.1566(5)   | 0.5602(4)   | 0.4127(3)   | 0.059(1) |
| C(32) | -0.0786(4)  | 0.7192(3)   | 0.3280(2)   | 0.044(1) |
| C(33) | 0.1480(9)   | 0.6356(5)   | 0.4860(3)   | 0.090(2) |
| C(34) | 0.2994(6)   | 0.4886(5)   | 0.4080(4)   | 0.076(2) |
| C(35) | -0.1136(5)  | 0.8121(4)   | 0.3897(3)   | 0.064(1) |
| C(36) | -0.1775(5)  | 0.6379(4)   | 0.3400(4)   | 0.065(1) |
| C(41) | 0.5425(3)   | 0.7246(3)   | 0.0995(2)   | 0.035(1) |
| C(42) | 0.4570(3)   | 0.9515(3)   | 0.15735(18) | 0.026(1) |
| C(43) | 0.4880(4)   | 0.6384(3)   | 0.0512(2)   | 0.038(1) |
| C(44) | 0.6381(4)   | 0.7828(4)   | 0.0446(3)   | 0.060(1) |
| C(45) | 0.5732(3)   | 0.9310(3)   | 0.2210(2)   | 0.035(1) |
| C(46) | 0.3414(3)   | 1.0580(2)   | 0.17307(18) | 0.028(1) |
| C(61) | 0.2026(3)   | 0.9299(2)   | 0.35140(16) | 0.020(1) |

|        |            |           |             |          |
|--------|------------|-----------|-------------|----------|
| C(62)  | 0.1615(3)  | 0.8894(2) | 0.27830(16) | 0.020(1) |
| C(63)  | 0.0456(3)  | 0.9643(2) | 0.23905(16) | 0.022(1) |
| C(64)  | -0.0204(3) | 1.0681(2) | 0.26793(17) | 0.025(1) |
| C(65)  | 0.0253(3)  | 1.1057(2) | 0.33886(18) | 0.027(1) |
| C(66)  | 0.1359(3)  | 1.0366(2) | 0.37995(17) | 0.023(1) |
| C(71)  | 0.3821(3)  | 0.8608(2) | 0.46698(17) | 0.023(1) |
| C(72)  | 0.5285(3)  | 0.8180(3) | 0.47790(18) | 0.028(1) |
| C(73)  | 0.5898(3)  | 0.8234(3) | 0.55107(19) | 0.031(1) |
| C(74)  | 0.5057(4)  | 0.8712(3) | 0.61457(18) | 0.032(1) |
| C(75)  | 0.3592(4)  | 0.9104(3) | 0.60561(19) | 0.034(1) |
| C(76)  | 0.2971(3)  | 0.9056(3) | 0.53209(17) | 0.028(1) |
| C(81)  | 0.6028(4)  | 0.4061(3) | 0.2319(2)   | 0.038(1) |
| C(82)  | 0.7219(4)  | 0.4172(4) | 0.1705(3)   | 0.057(1) |
| C(83)  | 0.6649(5)  | 0.3700(3) | 0.3158(3)   | 0.052(1) |
| C(84)  | 0.5207(4)  | 0.3195(3) | 0.2050(3)   | 0.045(1) |
| H      | 0.045(4)   | 0.763(3)  | 0.184(2)    | 0.037    |
| H(13)  | 0.0894     | 0.4047    | 0.2988      | 0.053    |
| H(14)  | 0.1016     | 0.2953    | 0.1873      | 0.053    |
| H(15)  | 0.1299     | 0.3747    | 0.0628      | 0.053    |
| H(16)  | 0.1490     | 0.5643    | 0.0439      | 0.053    |
| H(23)  | 0.3390     | 0.9586    | -0.0044     | 0.043    |
| H(24)  | 0.1785     | 0.9647    | -0.1063     | 0.053    |
| H(25)  | 0.0008     | 0.8611    | -0.0907     | 0.054    |
| H(26)  | -0.0180    | 0.7524    | 0.0251      | 0.045    |
| H(31)  | 0.0859     | 0.5125    | 0.4204      | 0.070    |
| H(32)  | -0.1038    | 0.7587    | 0.2761      | 0.053    |
| H(33A) | 0.1471     | 0.5896    | 0.5345      | 0.135    |
| H(33B) | 0.0617     | 0.6938    | 0.4838      | 0.135    |
| H(33C) | 0.2300     | 0.6698    | 0.4848      | 0.135    |
| H(34A) | 0.3075     | 0.4277    | 0.4480      | 0.114    |
| H(34B) | 0.3694     | 0.5325    | 0.4170      | 0.114    |
| H(34C) | 0.3158     | 0.4580    | 0.3558      | 0.114    |
| H(35A) | -0.2146    | 0.8455    | 0.3895      | 0.097    |
| H(35B) | -0.0602    | 0.8695    | 0.3760      | 0.097    |
| H(35C) | -0.0877    | 0.7793    | 0.4421      | 0.097    |
| H(36A) | -0.2754    | 0.6790    | 0.3364      | 0.098    |
| H(36B) | -0.1629    | 0.5999    | 0.3919      | 0.098    |

|        |         |        |        |       |
|--------|---------|--------|--------|-------|
| H(36C) | -0.1571 | 0.5830 | 0.2995 | 0.098 |
| H(41)  | 0.6034  | 0.6815 | 0.1415 | 0.042 |
| H(42)  | 0.5037  | 0.9646 | 0.1056 | 0.032 |
| H(43A) | 0.5682  | 0.5818 | 0.0332 | 0.057 |
| H(43B) | 0.4368  | 0.6767 | 0.0058 | 0.057 |
| H(43C) | 0.4249  | 0.6027 | 0.0846 | 0.057 |
| H(44A) | 0.7101  | 0.7265 | 0.0192 | 0.089 |
| H(44B) | 0.6838  | 0.8289 | 0.0756 | 0.089 |
| H(44C) | 0.5807  | 0.8296 | 0.0045 | 0.089 |
| H(45A) | 0.6161  | 0.9958 | 0.2213 | 0.052 |
| H(45B) | 0.6458  | 0.8652 | 0.2087 | 0.052 |
| H(45C) | 0.5305  | 0.9192 | 0.2727 | 0.052 |
| H(46A) | 0.3843  | 1.1230 | 0.1702 | 0.042 |
| H(46B) | 0.2987  | 1.0504 | 0.2254 | 0.042 |
| H(46C) | 0.2688  | 1.0674 | 0.1335 | 0.042 |
| H(63)  | 0.0129  | 0.9424 | 0.1919 | 0.027 |
| H(64)  | -0.0961 | 1.1138 | 0.2402 | 0.031 |
| H(65)  | -0.0186 | 1.1763 | 0.3576 | 0.032 |
| H(66)  | 0.1670  | 1.0605 | 0.4269 | 0.028 |
| H(72)  | 0.5859  | 0.7854 | 0.4355 | 0.033 |
| H(73)  | 0.6876  | 0.7947 | 0.5575 | 0.037 |
| H(74)  | 0.5474  | 0.8772 | 0.6631 | 0.039 |
| H(75)  | 0.3019  | 0.9399 | 0.6489 | 0.040 |
| H(76)  | 0.1987  | 0.9324 | 0.5264 | 0.033 |
| H(82A) | 0.7897  | 0.3460 | 0.1680 | 0.086 |
| H(82B) | 0.7700  | 0.4743 | 0.1861 | 0.086 |
| H(82C) | 0.6809  | 0.4384 | 0.1189 | 0.086 |
| H(83A) | 0.7308  | 0.2978 | 0.3136 | 0.079 |
| H(83B) | 0.5880  | 0.3643 | 0.3533 | 0.079 |
| H(83C) | 0.7146  | 0.4256 | 0.3325 | 0.079 |
| H(84A) | 0.5851  | 0.2467 | 0.2019 | 0.067 |
| H(84B) | 0.4813  | 0.3433 | 0.1533 | 0.067 |
| H(84C) | 0.4442  | 0.3141 | 0.2430 | 0.067 |

---

**Table S8.** Anisotropic displacement parameters ( $\text{\AA}^2$ ) for [ $\{\text{PC}(\text{sp}^3)\text{HP}\}\text{Fe}(-\text{C}^{\text{Ar}}-\text{C}^{\text{Bz}}=\text{O}-)(\text{NC}^t\text{Bu})$ ] (3). The anisotropic displacement factor exponent takes the form:  $-2\pi^2[\text{h}^2\text{a}^*2\text{U}_{11} + \dots + 2\text{hka}^*\text{b}^*\text{U}_{12}]$

| Atom  | $U_{11}$   | $U_{22}$   | $U_{33}$   | $U_{23}$    | $U_{13}$    | $U_{12}$    |
|-------|------------|------------|------------|-------------|-------------|-------------|
| Fe    | 0.0234(2)  | 0.0177(2)  | 0.0214(2)  | -0.0050(2)  | -0.0026(2)  | -0.0030(2)  |
| P(1)  | 0.0532(5)  | 0.0281(4)  | 0.0316(4)  | 0.0012(3)   | -0.0033(4)  | -0.0213(4)  |
| O     | 0.0290(10) | 0.0208(9)  | 0.0254(10) | -0.0054(8)  | -0.0063(8)  | -0.0009(8)  |
| N     | 0.0329(13) | 0.0244(12) | 0.0305(13) | -0.0070(10) | -0.0070(11) | -0.0040(11) |
| C     | 0.0216(13) | 0.0311(14) | 0.0233(14) | -0.0109(11) | 0.0001(11)  | -0.0075(11) |
| P(2)  | 0.0195(3)  | 0.0258(3)  | 0.0225(3)  | -0.0084(3)  | 0.0003(3)   | -0.0049(3)  |
| C(5)  | 0.0249(13) | 0.0210(13) | 0.0197(13) | -0.0013(10) | -0.0008(11) | -0.0068(10) |
| C(8)  | 0.0319(15) | 0.0248(15) | 0.0372(17) | -0.0064(12) | -0.0070(13) | -0.0025(13) |
| C(11) | 0.0310(7)  | 0.0368(8)  | 0.0700(10) | -0.0260(7)  | 0.0038(7)   | -0.0118(6)  |
| C(12) | 0.0310(7)  | 0.0368(8)  | 0.0700(10) | -0.0260(7)  | 0.0038(7)   | -0.0118(6)  |
| C(13) | 0.0310(7)  | 0.0368(8)  | 0.0700(10) | -0.0260(7)  | 0.0038(7)   | -0.0118(6)  |
| C(14) | 0.0310(7)  | 0.0368(8)  | 0.0700(10) | -0.0260(7)  | 0.0038(7)   | -0.0118(6)  |
| C(15) | 0.0310(7)  | 0.0368(8)  | 0.0700(10) | -0.0260(7)  | 0.0038(7)   | -0.0118(6)  |
| C(16) | 0.0310(7)  | 0.0368(8)  | 0.0700(10) | -0.0260(7)  | 0.0038(7)   | -0.0118(6)  |
| C(21) | 0.0233(13) | 0.0399(16) | 0.0198(14) | -0.0113(12) | 0.0020(11)  | -0.0056(12) |
| C(22) | 0.0258(14) | 0.0358(15) | 0.0191(13) | -0.0084(11) | 0.0010(11)  | -0.0057(12) |
| C(23) | 0.0357(16) | 0.053(2)   | 0.0228(15) | -0.0047(14) | 0.0018(13)  | -0.0149(15) |
| C(24) | 0.046(2)   | 0.068(2)   | 0.0192(15) | -0.0012(15) | -0.0030(14) | -0.0129(18) |
| C(25) | 0.0346(17) | 0.079(3)   | 0.0231(16) | -0.0076(16) | -0.0065(14) | -0.0120(18) |
| C(26) | 0.0265(15) | 0.062(2)   | 0.0278(16) | -0.0121(15) | -0.0010(13) | -0.0140(15) |
| C(31) | 0.076(3)   | 0.044(2)   | 0.061(3)   | 0.0129(19)  | -0.017(2)   | -0.024(2)   |
| C(32) | 0.059(2)   | 0.0364(18) | 0.041(2)   | -0.0135(15) | 0.0227(17)  | -0.0217(17) |
| C(33) | 0.164(7)   | 0.060(3)   | 0.053(3)   | 0.010(2)    | -0.033(4)   | -0.038(4)   |
| C(34) | 0.088(4)   | 0.066(3)   | 0.072(3)   | 0.013(3)    | 0.005(3)    | -0.016(3)   |
| C(35) | 0.073(3)   | 0.063(3)   | 0.069(3)   | -0.034(2)   | 0.033(2)    | -0.039(2)   |
| C(36) | 0.048(2)   | 0.052(2)   | 0.103(4)   | -0.032(3)   | 0.014(2)    | -0.020(2)   |
| C(41) | 0.0256(14) | 0.0371(17) | 0.0434(19) | -0.0191(15) | 0.0064(13)  | -0.0061(13) |
| C(42) | 0.0243(13) | 0.0306(15) | 0.0260(14) | -0.0068(11) | 0.0013(11)  | -0.0082(11) |
| C(43) | 0.0358(17) | 0.0401(18) | 0.0395(18) | -0.0215(15) | 0.0047(14)  | -0.0059(14) |
| C(44) | 0.045(2)   | 0.060(2)   | 0.079(3)   | -0.035(2)   | 0.041(2)    | -0.0210(19) |
| C(45) | 0.0275(15) | 0.0377(17) | 0.0422(18) | -0.0120(14) | -0.0051(13) | -0.0113(13) |
| C(46) | 0.0298(14) | 0.0262(14) | 0.0291(15) | -0.0031(11) | 0.0025(12)  | -0.0094(12) |
| C(61) | 0.0236(12) | 0.0200(12) | 0.0181(13) | -0.0015(10) | 0.0015(10)  | -0.0065(10) |

|       |            |            |            |             |             |             |
|-------|------------|------------|------------|-------------|-------------|-------------|
| C(62) | 0.0227(12) | 0.0209(12) | 0.0180(13) | -0.0004(10) | 0.0025(10)  | -0.0072(10) |
| C(63) | 0.0221(12) | 0.0241(13) | 0.0197(13) | -0.0020(10) | -0.0011(10) | -0.0037(10) |
| C(64) | 0.0257(13) | 0.0251(14) | 0.0240(14) | 0.0007(11)  | -0.0010(11) | -0.0021(11) |
| C(65) | 0.0304(14) | 0.0212(13) | 0.0268(15) | -0.0051(11) | 0.0017(12)  | -0.0012(11) |
| C(66) | 0.0267(13) | 0.0221(13) | 0.0219(13) | -0.0039(10) | 0.0007(11)  | -0.0060(11) |
| C(71) | 0.0292(14) | 0.0193(12) | 0.0217(14) | 0.0012(10)  | -0.0030(11) | -0.0090(11) |
| C(72) | 0.0287(14) | 0.0284(14) | 0.0261(15) | -0.0037(11) | -0.0017(12) | -0.0065(12) |
| C(73) | 0.0295(15) | 0.0335(15) | 0.0302(16) | 0.0008(12)  | -0.0070(12) | -0.0102(12) |
| C(74) | 0.0399(17) | 0.0401(17) | 0.0213(14) | 0.0003(12)  | -0.0073(13) | -0.0168(14) |
| C(75) | 0.0382(17) | 0.0450(18) | 0.0188(14) | -0.0008(13) | 0.0024(12)  | -0.0119(14) |
| C(76) | 0.0291(14) | 0.0325(15) | 0.0220(14) | 0.0009(11)  | -0.0001(11) | -0.0091(12) |
| C(81) | 0.0339(16) | 0.0262(15) | 0.052(2)   | -0.0082(14) | -0.0073(15) | 0.0045(13)  |
| C(82) | 0.0364(19) | 0.043(2)   | 0.087(3)   | -0.010(2)   | 0.006(2)    | 0.0051(16)  |
| C(83) | 0.051(2)   | 0.0337(18) | 0.069(3)   | -0.0013(18) | -0.026(2)   | 0.0016(16)  |
| C(84) | 0.048(2)   | 0.0290(16) | 0.056(2)   | -0.0126(16) | -0.0078(17) | -0.0006(15) |

---

**Table S9.** Distances [Å] for [ $\{\text{PC}(\text{sp}^3)\text{HP}\}\text{Fe}(-\text{C}^{\text{Ar}}-\text{C}^{\text{Bz}}=\text{O}-)(\text{NC}^t\text{Bu})$ ] (**3**).

| atom-atom    | distance  | atom-Atom    | distance  |
|--------------|-----------|--------------|-----------|
| Fe-C(62)     | 1.927(3)  | Fe-N         | 1.950(3)  |
| Fe-O         | 1.973(2)  | Fe-C         | 2.102(3)  |
| Fe-P(2)      | 2.2272(9) | Fe-P(1)      | 2.2876(9) |
| P(1)-C(12)   | 1.826(4)  | P(1)-C(31)   | 1.862(4)  |
| P(1)-C(32)   | 1.931(4)  | O-C(5)       | 1.272(3)  |
| N-C(8)       | 1.150(4)  | C-C(11)      | 1.502(4)  |
| C-C(21)      | 1.514(4)  | C-H          | 0.99(4)   |
| P(2)-C(22)   | 1.813(3)  | P(2)-C(42)   | 1.858(3)  |
| P(2)-C(41)   | 1.887(3)  | C(5)-C(61)   | 1.439(4)  |
| C(5)-C(71)   | 1.480(4)  | C(8)-C(81)   | 1.485(4)  |
| C(11)-C(16)  | 1.388(5)  | C(11)-C(12)  | 1.419(6)  |
| C(12)-C(13)  | 1.393(5)  | C(13)-C(14)  | 1.392(5)  |
| C(13)-H(13)  | 0.9300    | C(14)-C(15)  | 1.358(6)  |
| C(14)-H(14)  | 0.9300    | C(15)-C(16)  | 1.425(5)  |
| C(15)-H(15)  | 0.9300    | C(16)-H(16)  | 0.9300    |
| C(21)-C(22)  | 1.397(4)  | C(21)-C(26)  | 1.404(4)  |
| C(22)-C(23)  | 1.400(5)  | C(23)-C(24)  | 1.384(5)  |
| C(23)-H(23)  | 0.9300    | C(24)-C(25)  | 1.388(6)  |
| C(24)-H(24)  | 0.9300    | C(25)-C(26)  | 1.387(5)  |
| C(25)-H(25)  | 0.9300    | C(26)-H(26)  | 0.9300    |
| C(31)-C(34)  | 1.448(7)  | C(31)-C(33)  | 1.555(7)  |
| C(31)-H(31)  | 0.9800    | C(32)-C(36)  | 1.505(5)  |
| C(32)-C(35)  | 1.542(5)  | C(32)-H(32)  | 0.9800    |
| C(33)-H(33A) | 0.9600    | C(33)-H(33B) | 0.9600    |
| C(33)-H(33C) | 0.9600    | C(34)-H(34A) | 0.9600    |
| C(34)-H(34B) | 0.9600    | C(34)-H(34C) | 0.9600    |
| C(35)-H(35A) | 0.9600    | C(35)-H(35B) | 0.9600    |
| C(35)-H(35C) | 0.9600    | C(36)-H(36A) | 0.9600    |
| C(36)-H(36B) | 0.9600    | C(36)-H(36C) | 0.9600    |
| C(41)-C(44)  | 1.523(5)  | C(41)-C(43)  | 1.538(4)  |
| C(41)-H(41)  | 0.9800    | C(42)-C(46)  | 1.530(4)  |
| C(42)-C(45)  | 1.535(4)  | C(42)-H(42)  | 0.9800    |
| C(43)-H(43A) | 0.9600    | C(43)-H(43B) | 0.9600    |
| C(43)-H(43C) | 0.9600    | C(44)-H(44A) | 0.9600    |
| C(44)-H(44B) | 0.9600    | C(44)-H(44C) | 0.9600    |
| C(45)-H(45A) | 0.9600    | C(45)-H(45B) | 0.9600    |
| C(45)-H(45C) | 0.9600    | C(46)-H(46A) | 0.9600    |
| C(46)-H(46B) | 0.9600    | C(46)-H(46C) | 0.9600    |
| C(61)-C(66)  | 1.410(4)  | C(61)-C(62)  | 1.439(4)  |
| C(62)-C(63)  | 1.423(4)  | C(63)-C(64)  | 1.379(4)  |
| C(63)-H(63)  | 0.9300    | C(64)-C(65)  | 1.410(4)  |
| C(64)-H(64)  | 0.9300    | C(65)-C(66)  | 1.375(4)  |
| C(65)-H(65)  | 0.9300    | C(66)-H(66)  | 0.9300    |
| C(71)-C(72)  | 1.395(4)  | C(71)-C(76)  | 1.395(4)  |
| C(72)-C(73)  | 1.385(4)  | C(72)-H(72)  | 0.9300    |

|              |          |              |          |
|--------------|----------|--------------|----------|
| C(73)-C(74)  | 1.381(5) | C(73)-H(73)  | 0.9300   |
| C(74)-C(75)  | 1.385(5) | C(74)-H(74)  | 0.9300   |
| C(75)-C(76)  | 1.393(4) | C(75)-H(75)  | 0.9300   |
| C(76)-H(76)  | 0.9300   | C(81)-C(82)  | 1.527(6) |
| C(81)-C(84)  | 1.531(5) | C(81)-C(83)  | 1.546(5) |
| C(82)-H(82A) | 0.9600   | C(82)-H(82B) | 0.9600   |
| C(82)-H(82C) | 0.9600   | C(83)-H(83A) | 0.9600   |
| C(83)-H(83B) | 0.9600   | C(83)-H(83C) | 0.9600   |
| C(84)-H(84A) | 0.9600   | C(84)-H(84B) | 0.9600   |
| C(84)-H(84C) | 0.9600   |              |          |

---



**Table S10.** Angles [°] for [ $\{\text{PC}(\text{sp}^3)\text{HP}\}\text{Fe}(-\text{C}^{\text{Ar}}-\text{C}^{\text{Bz}}=\text{O})-(\text{NC}^t\text{Bu})$ ] (**3**).

| atom-atom-atom     | angle      | atom-atom-atom      | angle      |
|--------------------|------------|---------------------|------------|
| C(62)-Fe-N         | 169.07(11) | C(62)-Fe-O          | 81.59(10)  |
| N-Fe-O             | 87.52(9)   | C(62)-Fe-C          | 93.36(11)  |
| N-Fe-C             | 97.56(11)  | O-Fe-C              | 171.32(10) |
| C(62)-Fe-P(2)      | 91.62(8)   | N-Fe-P(2)           | 90.20(9)   |
| O-Fe-P(2)          | 104.38(7)  | C-Fe-P(2)           | 82.72(9)   |
| C(62)-Fe-P(1)      | 93.58(8)   | N-Fe-P(1)           | 88.48(9)   |
| O-Fe-P(1)          | 96.26(7)   | C-Fe-P(1)           | 76.93(9)   |
| P(2)-Fe-P(1)       | 159.25(3)  | C(12)-P(1)-C(31)    | 107.8(2)   |
| C(12)-P(1)-C(32)   | 100.51(16) | C(31)-P(1)-C(32)    | 102.8(2)   |
| C(12)-P(1)-Fe      | 97.51(13)  | C(31)-P(1)-Fe       | 125.84(16) |
| C(32)-P(1)-Fe      | 118.78(12) | C(5)-O-Fe           | 116.33(17) |
| C(8)-N-Fe          | 177.6(3)   | C(11)-C-C(21)       | 118.7(3)   |
| C(11)-C-Fe         | 108.8(2)   | C(21)-C-Fe          | 117.08(19) |
| C(11)-C-H          | 106(2)     | C(21)-C-H           | 104(2)     |
| Fe-C-H             | 100(2)     | C(22)-P(2)-C(42)    | 106.11(14) |
| C(22)-P(2)-C(41)   | 99.96(14)  | C(42)-P(2)-C(41)    | 101.31(14) |
| C(22)-P(2)-Fe      | 105.06(10) | C(42)-P(2)-Fe       | 124.35(10) |
| C(41)-P(2)-Fe      | 117.08(12) | O-C(5)-C(61)        | 115.9(2)   |
| O-C(5)-C(71)       | 117.4(2)   | C(61)-C(5)-C(71)    | 126.7(2)   |
| N-C(8)-C(81)       | 177.3(3)   | C(16)-C(11)-C(12)   | 117.7(3)   |
| C(16)-C(11)-C      | 127.4(4)   | C(12)-C(11)-C       | 114.9(3)   |
| C(13)-C(12)-C(11)  | 121.5(3)   | C(13)-C(12)-P(1)    | 127.2(4)   |
| C(11)-C(12)-P(1)   | 111.2(3)   | C(14)-C(13)-C(12)   | 120.0(4)   |
| C(14)-C(13)-H(13)  | 120.0      | C(12)-C(13)-H(13)   | 120.0      |
| C(15)-C(14)-C(13)  | 119.1(4)   | C(15)-C(14)-H(14)   | 120.4      |
| C(13)-C(14)-H(14)  | 120.4      | C(14)-C(15)-C(16)   | 122.1(4)   |
| C(14)-C(15)-H(15)  | 119.0      | C(16)-C(15)-H(15)   | 119.0      |
| C(11)-C(16)-C(15)  | 119.5(4)   | C(11)-C(16)-H(16)   | 120.2      |
| C(15)-C(16)-H(16)  | 120.2      | C(22)-C(21)-C(26)   | 117.8(3)   |
| C(22)-C(21)-C      | 119.1(2)   | C(26)-C(21)-C       | 122.9(3)   |
| C(21)-C(22)-C(23)  | 121.2(3)   | C(21)-C(22)-P(2)    | 112.5(2)   |
| C(23)-C(22)-P(2)   | 126.1(2)   | C(24)-C(23)-C(22)   | 120.0(3)   |
| C(24)-C(23)-H(23)  | 120.0      | C(22)-C(23)-H(23)   | 120.0      |
| C(23)-C(24)-C(25)  | 119.4(3)   | C(23)-C(24)-H(24)   | 120.3      |
| C(25)-C(24)-H(24)  | 120.3      | C(26)-C(25)-C(24)   | 120.8(3)   |
| C(26)-C(25)-H(25)  | 119.6      | C(24)-C(25)-H(25)   | 119.6      |
| C(25)-C(26)-C(21)  | 120.8(3)   | C(25)-C(26)-H(26)   | 119.6      |
| C(21)-C(26)-H(26)  | 119.6      | C(34)-C(31)-C(33)   | 108.5(5)   |
| C(34)-C(31)-P(1)   | 108.6(4)   | C(33)-C(31)-P(1)    | 112.3(3)   |
| C(34)-C(31)-H(31)  | 109.1      | C(33)-C(31)-H(31)   | 109.1      |
| P(1)-C(31)-H(31)   | 109.1      | C(36)-C(32)-C(35)   | 110.8(3)   |
| C(36)-C(32)-P(1)   | 113.8(3)   | C(35)-C(32)-P(1)    | 115.5(3)   |
| C(36)-C(32)-H(32)  | 105.2      | C(35)-C(32)-H(32)   | 105.2      |
| P(1)-C(32)-H(32)   | 105.2      | C(31)-C(33)-H(33A)  | 109.5      |
| C(31)-C(33)-H(33B) | 109.5      | H(33A)-C(33)-H(33B) | 109.5      |

|                     |            |                     |          |
|---------------------|------------|---------------------|----------|
| C(31)-C(33)-H(33C)  | 109.5      | H(33A)-C(33)-H(33C) | 109.5    |
| H(33B)-C(33)-H(33C) | 109.5      | C(31)-C(34)-H(34A)  | 109.5    |
| C(31)-C(34)-H(34B)  | 109.5      | H(34A)-C(34)-H(34B) | 109.5    |
| C(31)-C(34)-H(34C)  | 109.5      | H(34A)-C(34)-H(34C) | 109.5    |
| H(34B)-C(34)-H(34C) | 109.5      | C(32)-C(35)-H(35A)  | 109.5    |
| C(32)-C(35)-H(35B)  | 109.5      | H(35A)-C(35)-H(35B) | 109.5    |
| C(32)-C(35)-H(35C)  | 109.5      | H(35A)-C(35)-H(35C) | 109.5    |
| H(35B)-C(35)-H(35C) | 109.5      | C(32)-C(36)-H(36A)  | 109.5    |
| C(32)-C(36)-H(36B)  | 109.5      | H(36A)-C(36)-H(36B) | 109.5    |
| C(32)-C(36)-H(36C)  | 109.5      | H(36A)-C(36)-H(36C) | 109.5    |
| H(36B)-C(36)-H(36C) | 109.5      | C(44)-C(41)-C(43)   | 108.5(3) |
| C(44)-C(41)-P(2)    | 116.3(2)   | C(43)-C(41)-P(2)    | 110.2(2) |
| C(44)-C(41)-H(41)   | 107.2      | C(43)-C(41)-H(41)   | 107.2    |
| P(2)-C(41)-H(41)    | 107.2      | C(46)-C(42)-C(45)   | 111.3(2) |
| C(46)-C(42)-P(2)    | 114.3(2)   | C(45)-C(42)-P(2)    | 108.9(2) |
| C(46)-C(42)-H(42)   | 107.3      | C(45)-C(42)-H(42)   | 107.3    |
| P(2)-C(42)-H(42)    | 107.3      | C(41)-C(43)-H(43A)  | 109.5    |
| C(41)-C(43)-H(43B)  | 109.5      | H(43A)-C(43)-H(43B) | 109.5    |
| C(41)-C(43)-H(43C)  | 109.5      | H(43A)-C(43)-H(43C) | 109.5    |
| H(43B)-C(43)-H(43C) | 109.5      | C(41)-C(44)-H(44A)  | 109.5    |
| C(41)-C(44)-H(44B)  | 109.5      | H(44A)-C(44)-H(44B) | 109.5    |
| C(41)-C(44)-H(44C)  | 109.5      | H(44A)-C(44)-H(44C) | 109.5    |
| H(44B)-C(44)-H(44C) | 109.5      | C(42)-C(45)-H(45A)  | 109.5    |
| C(42)-C(45)-H(45B)  | 109.5      | H(45A)-C(45)-H(45B) | 109.5    |
| C(42)-C(45)-H(45C)  | 109.5      | H(45A)-C(45)-H(45C) | 109.5    |
| H(45B)-C(45)-H(45C) | 109.5      | C(42)-C(46)-H(46A)  | 109.5    |
| C(42)-C(46)-H(46B)  | 109.5      | H(46A)-C(46)-H(46B) | 109.5    |
| C(42)-C(46)-H(46C)  | 109.5      | H(46A)-C(46)-H(46C) | 109.5    |
| H(46B)-C(46)-H(46C) | 109.5      | C(66)-C(61)-C(62)   | 122.4(2) |
| C(66)-C(61)-C(5)    | 125.3(2)   | C(62)-C(61)-C(5)    | 112.3(2) |
| C(63)-C(62)-C(61)   | 114.5(2)   | C(63)-C(62)-Fe      | 132.2(2) |
| C(61)-C(62)-Fe      | 113.33(19) | C(64)-C(63)-C(62)   | 122.8(3) |
| C(64)-C(63)-H(63)   | 118.6      | C(62)-C(63)-H(63)   | 118.6    |
| C(63)-C(64)-C(65)   | 120.9(3)   | C(63)-C(64)-H(64)   | 119.5    |
| C(65)-C(64)-H(64)   | 119.5      | C(66)-C(65)-C(64)   | 119.0(3) |
| C(66)-C(65)-H(65)   | 120.5      | C(64)-C(65)-H(65)   | 120.5    |
| C(65)-C(66)-C(61)   | 120.4(3)   | C(65)-C(66)-H(66)   | 119.8    |
| C(61)-C(66)-H(66)   | 119.8      | C(72)-C(71)-C(76)   | 118.7(3) |
| C(72)-C(71)-C(5)    | 118.6(3)   | C(76)-C(71)-C(5)    | 122.7(3) |
| C(73)-C(72)-C(71)   | 120.8(3)   | C(73)-C(72)-H(72)   | 119.6    |
| C(71)-C(72)-H(72)   | 119.6      | C(74)-C(73)-C(72)   | 120.2(3) |
| C(74)-C(73)-H(73)   | 119.9      | C(72)-C(73)-H(73)   | 119.9    |
| C(73)-C(74)-C(75)   | 119.7(3)   | C(73)-C(74)-H(74)   | 120.1    |
| C(75)-C(74)-H(74)   | 120.1      | C(74)-C(75)-C(76)   | 120.3(3) |
| C(74)-C(75)-H(75)   | 119.8      | C(76)-C(75)-H(75)   | 119.8    |
| C(75)-C(76)-C(71)   | 120.2(3)   | C(75)-C(76)-H(76)   | 119.9    |
| C(71)-C(76)-H(76)   | 119.9      | C(8)-C(81)-C(82)    | 110.0(3) |
| C(8)-C(81)-C(84)    | 107.8(3)   | C(82)-C(81)-C(84)   | 109.6(3) |

|                     |          |                     |          |
|---------------------|----------|---------------------|----------|
| C(8)-C(81)-C(83)    | 108.2(3) | C(82)-C(81)-C(83)   | 111.0(3) |
| C(84)-C(81)-C(83)   | 110.1(3) | C(81)-C(82)-H(82A)  | 109.5    |
| C(81)-C(82)-H(82B)  | 109.5    | H(82A)-C(82)-H(82B) | 109.5    |
| C(81)-C(82)-H(82C)  | 109.5    | H(82A)-C(82)-H(82C) | 109.5    |
| H(82B)-C(82)-H(82C) | 109.5    | C(81)-C(83)-H(83A)  | 109.5    |
| C(81)-C(83)-H(83B)  | 109.5    | H(83A)-C(83)-H(83B) | 109.5    |
| C(81)-C(83)-H(83C)  | 109.5    | H(83A)-C(83)-H(83C) | 109.5    |
| H(83B)-C(83)-H(83C) | 109.5    | C(81)-C(84)-H(84A)  | 109.5    |
| C(81)-C(84)-H(84B)  | 109.5    | H(84A)-C(84)-H(84B) | 109.5    |
| C(81)-C(84)-H(84C)  | 109.5    | H(84A)-C(84)-H(84C) | 109.5    |
| H(84B)-C(84)-H(84C) | 109.5    |                     |          |

---

3.3 Crystal data for [ $\{PC(sp^3)HP\}Fe(-C^{Ar}-N=NPh)\}$ ] (4).

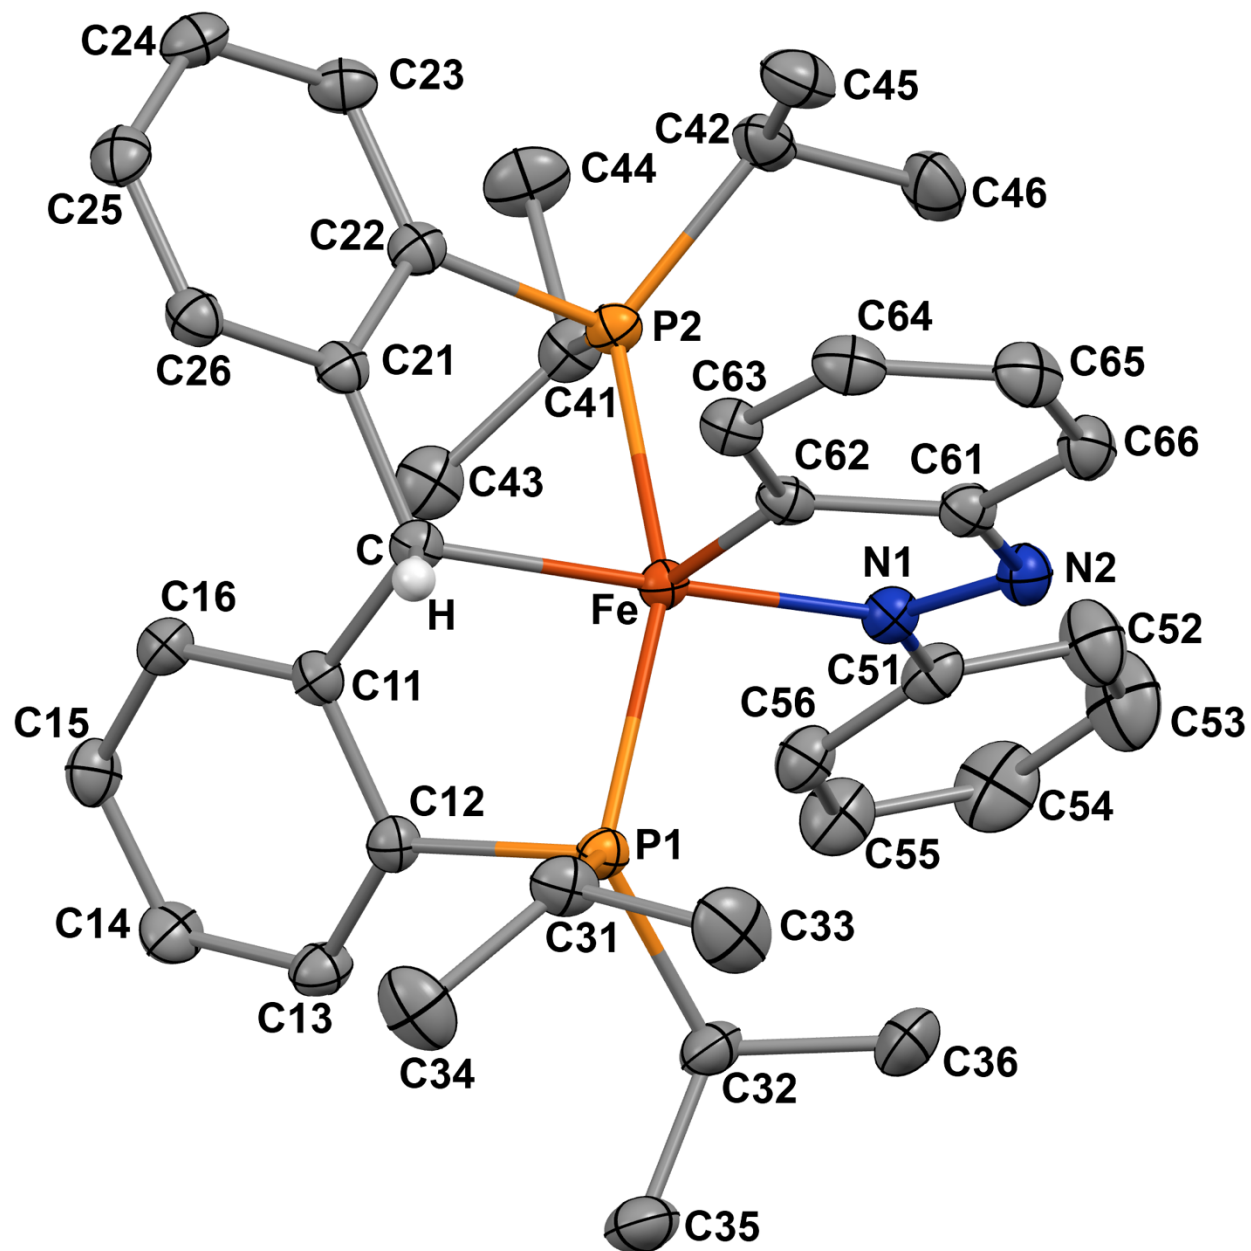

**Figure S13.** Thermal ellipsoid representation of [ $\{PC(sp^3)HP\}Fe(-C^{Ar}-N=NPh)\}$ ] (4) at the 50% probability level. Most hydrogen atoms omitted for clarity.

**Table S11.** Crystal data and structural refinement [ $\{\text{PC}(\text{sp}^3)\text{HP}\}\text{Fe}(-\text{C}^{\text{Ar}}-\text{N}=\text{NPh})$ ] (4).

|                                             |                                                               |
|---------------------------------------------|---------------------------------------------------------------|
| Identification code                         | ZL_V_215_a                                                    |
| Empirical formula                           | $\text{C}_{37}\text{H}_{46}\text{FeN}_2\text{P}_2$            |
| Formula weight                              | 636.55                                                        |
| Temperature                                 | 120(2) K                                                      |
| Wavelength                                  | 1.54178 Å                                                     |
| Crystal system                              | Triclinic                                                     |
| Space group                                 | P-1                                                           |
| <i>a</i>                                    | 10.0838(4) Å                                                  |
| <i>b</i>                                    | 10.1841(6) Å                                                  |
| <i>c</i>                                    | 17.5352(7) Å                                                  |
| $\alpha$                                    | 89.243(2)°                                                    |
| $\beta$                                     | 88.0700(10)°                                                  |
| $\gamma$                                    | 65.7090(10)°                                                  |
| Volume                                      | 1640.41(13) Å <sup>3</sup>                                    |
| <i>Z</i>                                    | 2                                                             |
| Density (calculated)                        | 1.289 g.cm <sup>-3</sup>                                      |
| Absorption coefficient ( $\mu$ )            | 4.811 mm <sup>-1</sup>                                        |
| F(000)                                      | 676                                                           |
| Crystal size                                | 0.223 × 0.172 × 0.170 mm <sup>3</sup>                         |
| $\theta$ range for data collection          | 2.521 to 72.399°                                              |
| Index ranges                                | -12 ≤ <i>h</i> ≤ 12, -12 ≤ <i>k</i> ≤ 12, -21 ≤ <i>l</i> ≤ 21 |
| Reflections collected                       | 29692                                                         |
| Independent reflections                     | 6481 [ $R_{\text{int}} = 0.0296$ ]                            |
| Completeness to $\theta = 67.679^\circ$     | 99.7 %                                                        |
| Absorption correction                       | Semi-empirical from equivalents                               |
| Max. and min. transmission                  | 1.000 and 0.379                                               |
| Refinement method                           | Full-matrix least-squares on $F^2$                            |
| Data / restraints / parameters              | 6481 / 0 / 390                                                |
| Goodness-of-fit on $F^2$                    | 1.039                                                         |
| Final <i>R</i> indices [ $I > 2\sigma(I)$ ] | $R_1 = 0.0272$ , $wR_2 = 0.0729$                              |
| <i>R</i> indices (all data)                 | $R_1 = 0.0275$ , $wR_2 = 0.0732$                              |
| Extinction coefficient                      | n/a                                                           |
| Largest diff. peak and hole                 | 0.364 and -0.225 e <sup>-</sup> .Å <sup>-3</sup>              |

**Table S12.** Atomic coordinates and equivalent isotropic displacement parameters ( $\text{\AA}^2$ ) for [ $\{\text{PC}(\text{sp}^3)\text{HP}\}\text{Fe}(-\text{C}^{\text{Ar}}-\text{N}=\text{NPh})$ ] (**4**).  $U(\text{eq})$  is defined as one third of the trace of the orthogonalized  $U_{ij}$  tensor.

| atom  | x           | y            | z           | $U(\text{eq})$ |
|-------|-------------|--------------|-------------|----------------|
| Fe    | 0.70075(2)  | 0.36028(2)   | 0.25171(2)  | 0.015(1)       |
| P(1)  | 0.63793(3)  | 0.23494(3)   | 0.16538(2)  | 0.017(1)       |
| P(2)  | 0.84256(3)  | 0.44974(3)   | 0.30737(2)  | 0.017(1)       |
| N(1)  | 0.62062(12) | 0.31727(12)  | 0.34341(6)  | 0.019(1)       |
| N(2)  | 0.49299(12) | 0.40767(13)  | 0.37030(6)  | 0.022(1)       |
| C     | 0.78508(14) | 0.41364(14)  | 0.15130(7)  | 0.017(1)       |
| C(11) | 0.88304(14) | 0.26563(14)  | 0.12336(7)  | 0.017(1)       |
| C(12) | 0.82339(14) | 0.16162(14)  | 0.12518(7)  | 0.018(1)       |
| C(13) | 0.91059(15) | 0.01831(15)  | 0.10790(8)  | 0.022(1)       |
| C(14) | 1.05718(15) | -0.02416(15) | 0.08786(8)  | 0.025(1)       |
| C(15) | 1.11563(14) | 0.07734(15)  | 0.08379(8)  | 0.023(1)       |
| C(16) | 1.02990(14) | 0.22078(15)  | 0.10111(7)  | 0.020(1)       |
| C(21) | 0.86325(14) | 0.51066(13)  | 0.15897(7)  | 0.018(1)       |
| C(22) | 0.90713(14) | 0.53225(14)  | 0.23091(7)  | 0.019(1)       |
| C(23) | 0.98884(15) | 0.61366(15)  | 0.23874(8)  | 0.023(1)       |
| C(24) | 1.02693(15) | 0.67427(15)  | 0.17533(8)  | 0.024(1)       |
| C(25) | 0.98066(15) | 0.65633(14)  | 0.10362(8)  | 0.023(1)       |
| C(26) | 0.89919(15) | 0.57627(14)  | 0.09562(8)  | 0.021(1)       |
| C(31) | 0.51278(15) | 0.33649(15)  | 0.08904(8)  | 0.023(1)       |
| C(32) | 0.60128(15) | 0.07529(15)  | 0.19206(8)  | 0.024(1)       |
| C(33) | 0.35331(16) | 0.3773(2)    | 0.11279(10) | 0.038(1)       |
| C(34) | 0.54910(18) | 0.26985(19)  | 0.00940(9)  | 0.036(1)       |
| C(35) | 0.57755(18) | -0.01034(18) | 0.12628(10) | 0.032(1)       |
| C(36) | 0.47699(18) | 0.11205(19)  | 0.25194(9)  | 0.034(1)       |
| C(41) | 1.00689(15) | 0.30560(15)  | 0.34883(8)  | 0.022(1)       |
| C(42) | 0.77945(15) | 0.58739(16)  | 0.38422(8)  | 0.024(1)       |
| C(43) | 1.08698(15) | 0.18976(16)  | 0.28912(9)  | 0.027(1)       |
| C(44) | 1.11407(17) | 0.35636(18)  | 0.38468(10) | 0.033(1)       |
| C(45) | 0.65861(17) | 0.72969(17)  | 0.35926(9)  | 0.031(1)       |
| C(46) | 0.73328(18) | 0.52765(19)  | 0.45603(8)  | 0.032(1)       |
| C(51) | 0.69058(15) | 0.19395(15)  | 0.39048(8)  | 0.022(1)       |
| C(52) | 0.64991(19) | 0.18888(18)  | 0.46691(9)  | 0.034(1)       |
| C(53) | 0.7251(2)   | 0.0663(2)    | 0.50950(10) | 0.043(1)       |

|        |             |              |             |          |
|--------|-------------|--------------|-------------|----------|
| C(54)  | 0.8396(2)   | -0.05020(19) | 0.47700(10) | 0.039(1) |
| C(55)  | 0.88054(17) | -0.04560(17) | 0.40127(10) | 0.031(1) |
| C(56)  | 0.80625(15) | 0.07705(16)  | 0.35805(8)  | 0.025(1) |
| C(61)  | 0.44042(14) | 0.52599(14)  | 0.32278(7)  | 0.020(1) |
| C(62)  | 0.52859(14) | 0.52797(14)  | 0.25772(7)  | 0.018(1) |
| C(63)  | 0.47505(15) | 0.65320(15)  | 0.21218(8)  | 0.021(1) |
| C(64)  | 0.34521(15) | 0.76819(15)  | 0.23085(8)  | 0.024(1) |
| C(65)  | 0.26140(15) | 0.76387(16)  | 0.29573(9)  | 0.027(1) |
| C(66)  | 0.30809(15) | 0.64315(16)  | 0.34135(8)  | 0.025(1) |
| H      | 0.706(2)    | 0.4592(19)   | 0.1138(10)  | 0.026    |
| H(13)  | 0.8700      | -0.0509      | 0.1098      | 0.026    |
| H(14)  | 1.1169      | -0.1225      | 0.0770      | 0.030    |
| H(15)  | 1.2152      | 0.0486       | 0.0690      | 0.028    |
| H(16)  | 1.0713      | 0.2893       | 0.0978      | 0.024    |
| H(23)  | 1.0183      | 0.6274       | 0.2878      | 0.027    |
| H(24)  | 1.0842      | 0.7278       | 0.1805      | 0.029    |
| H(25)  | 1.0051      | 0.6992       | 0.0601      | 0.028    |
| H(26)  | 0.8673      | 0.5657       | 0.0466      | 0.026    |
| H(31)  | 0.5230      | 0.4299       | 0.0845      | 0.028    |
| H(32)  | 0.6906      | 0.0071       | 0.2177      | 0.029    |
| H(33A) | 0.2903      | 0.4508       | 0.0779      | 0.057    |
| H(33B) | 0.3354      | 0.4156       | 0.1649      | 0.057    |
| H(33C) | 0.3321      | 0.2918       | 0.1107      | 0.057    |
| H(34A) | 0.4879      | 0.3391       | -0.0278     | 0.054    |
| H(34B) | 0.5309      | 0.1825       | 0.0086      | 0.054    |
| H(34C) | 0.6518      | 0.2452       | -0.0037     | 0.054    |
| H(35A) | 0.4814      | 0.0442       | 0.1052      | 0.049    |
| H(35B) | 0.5833      | -0.1033      | 0.1454      | 0.049    |
| H(35C) | 0.6528      | -0.0265      | 0.0863      | 0.049    |
| H(36A) | 0.3849      | 0.1747       | 0.2291      | 0.050    |
| H(36B) | 0.4956      | 0.1618       | 0.2950      | 0.050    |
| H(36C) | 0.4710      | 0.0231       | 0.2700      | 0.050    |
| H(41)  | 0.9715      | 0.2586       | 0.3903      | 0.027    |
| H(42)  | 0.8644      | 0.6083       | 0.3976      | 0.029    |
| H(43A) | 1.0193      | 0.1537       | 0.2683      | 0.041    |
| H(43B) | 1.1674      | 0.1102       | 0.3129      | 0.041    |
| H(43C) | 1.1256      | 0.2311       | 0.2479      | 0.041    |

|        |        |         |        |       |
|--------|--------|---------|--------|-------|
| H(44A) | 1.1502 | 0.4048  | 0.3459 | 0.049 |
| H(44B) | 1.1960 | 0.2731  | 0.4047 | 0.049 |
| H(44C) | 1.0646 | 0.4237  | 0.4264 | 0.049 |
| H(45A) | 0.6881 | 0.7610  | 0.3110 | 0.046 |
| H(45B) | 0.6413 | 0.8031  | 0.3985 | 0.046 |
| H(45C) | 0.5691 | 0.7160  | 0.3523 | 0.046 |
| H(46A) | 0.6503 | 0.5053  | 0.4449 | 0.047 |
| H(46B) | 0.7053 | 0.5996  | 0.4969 | 0.047 |
| H(46C) | 0.8147 | 0.4398  | 0.4723 | 0.047 |
| H(52)  | 0.5715 | 0.2686  | 0.4896 | 0.041 |
| H(53)  | 0.6976 | 0.0624  | 0.5616 | 0.052 |
| H(54)  | 0.8902 | -0.1335 | 0.5067 | 0.047 |
| H(55)  | 0.9590 | -0.1257 | 0.3788 | 0.037 |
| H(56)  | 0.8348 | 0.0808  | 0.3062 | 0.030 |
| H(63)  | 0.5293 | 0.6586  | 0.1678 | 0.025 |
| H(64)  | 0.3122 | 0.8514  | 0.1993 | 0.029 |
| H(65)  | 0.1728 | 0.8440  | 0.3081 | 0.032 |
| H(66)  | 0.2515 | 0.6390  | 0.3850 | 0.030 |

---



**Table S13.** Anisotropic displacement parameters ( $\text{\AA}^2$ ) for [ $\{\text{PC}(\text{sp}^3)\text{HP}\}\text{Fe}(-\text{C}^{\text{Ar}}-\text{N}=\text{NPh})$ ] (**4**). The anisotropic displacement factor exponent takes the form:  $-2\pi^2[\text{h}^2\text{a}^2\text{U}_{11} + \dots + 2\text{hka}^*\text{b}^*\text{U}_{12}]$

| atom  | $U_{11}$  | $U_{22}$   | $U_{33}$  | $U_{23}$   | $U_{13}$   | $U_{12}$   |
|-------|-----------|------------|-----------|------------|------------|------------|
| Fe    | 0.0128(1) | 0.0146(1)  | 0.0166(1) | 0.0004(1)  | -0.0016(1) | -0.0049(1) |
| P(1)  | 0.0139(2) | 0.0172(2)  | 0.0200(2) | -0.0012(1) | -0.0011(1) | -0.0064(1) |
| P(2)  | 0.0170(2) | 0.0186(2)  | 0.0168(2) | 0.0012(1)  | -0.0033(1) | -0.0078(1) |
| N(1)  | 0.0175(5) | 0.0195(5)  | 0.0198(5) | 0.0016(4)  | -0.0023(4) | -0.0072(4) |
| N(2)  | 0.0190(5) | 0.0230(6)  | 0.0216(5) | -0.0002(4) | 0.0006(4)  | -0.0078(5) |
| C     | 0.0165(6) | 0.0173(6)  | 0.0177(6) | 0.0000(5)  | -0.0015(5) | -0.0064(5) |
| C(11) | 0.0176(6) | 0.0180(6)  | 0.0143(5) | 0.0013(5)  | -0.0024(4) | -0.0064(5) |
| C(12) | 0.0153(6) | 0.0187(6)  | 0.0180(6) | 0.0009(5)  | -0.0019(4) | -0.0059(5) |
| C(13) | 0.0197(6) | 0.0172(6)  | 0.0291(7) | 0.0007(5)  | -0.0014(5) | -0.0077(5) |
| C(14) | 0.0200(6) | 0.0160(6)  | 0.0332(7) | -0.0004(5) | 0.0008(5)  | -0.0025(5) |
| C(15) | 0.0155(6) | 0.0243(7)  | 0.0261(7) | 0.0006(5)  | 0.0009(5)  | -0.0048(5) |
| C(16) | 0.0188(6) | 0.0207(6)  | 0.0214(6) | 0.0015(5)  | -0.0006(5) | -0.0095(5) |
| C(21) | 0.0157(6) | 0.0139(6)  | 0.0214(6) | -0.0005(5) | -0.0003(5) | -0.0034(5) |
| C(22) | 0.0177(6) | 0.0159(6)  | 0.0218(6) | 0.0013(5)  | -0.0016(5) | -0.0057(5) |
| C(23) | 0.0239(7) | 0.0207(7)  | 0.0249(7) | 0.0011(5)  | -0.0056(5) | -0.0099(5) |
| C(24) | 0.0244(7) | 0.0190(6)  | 0.0323(7) | 0.0023(5)  | -0.0035(5) | -0.0115(5) |
| C(25) | 0.0250(7) | 0.0172(6)  | 0.0259(7) | 0.0033(5)  | 0.0015(5)  | -0.0081(5) |
| C(26) | 0.0232(6) | 0.0194(6)  | 0.0200(6) | -0.0002(5) | -0.0005(5) | -0.0075(5) |
| C(31) | 0.0182(6) | 0.0220(7)  | 0.0278(7) | -0.0008(5) | -0.0062(5) | -0.0053(5) |
| C(32) | 0.0218(7) | 0.0229(7)  | 0.0321(7) | 0.0005(6)  | 0.0000(5)  | -0.0131(6) |
| C(33) | 0.0171(7) | 0.0444(10) | 0.0443(9) | -0.0052(7) | -0.0074(6) | -0.0035(7) |
| C(34) | 0.0325(8) | 0.0405(9)  | 0.0253(7) | -0.0009(6) | -0.0082(6) | -0.0054(7) |
| C(35) | 0.0308(8) | 0.0294(8)  | 0.0431(9) | -0.0059(7) | 0.0001(6)  | -0.0187(7) |
| C(36) | 0.0301(8) | 0.0410(9)  | 0.0377(8) | -0.0019(7) | 0.0049(6)  | -0.0234(7) |
| C(41) | 0.0201(6) | 0.0254(7)  | 0.0223(6) | 0.0067(5)  | -0.0062(5) | -0.0098(5) |
| C(42) | 0.0234(7) | 0.0282(7)  | 0.0226(6) | -0.0068(5) | -0.0018(5) | -0.0117(6) |
| C(43) | 0.0199(7) | 0.0260(7)  | 0.0314(7) | 0.0045(6)  | -0.0047(5) | -0.0048(6) |
| C(44) | 0.0267(7) | 0.0351(8)  | 0.0378(8) | 0.0069(7)  | -0.0160(6) | -0.0134(7) |
| C(45) | 0.0291(8) | 0.0259(7)  | 0.0350(8) | -0.0098(6) | -0.0024(6) | -0.0085(6) |
| C(46) | 0.0321(8) | 0.0436(9)  | 0.0212(7) | -0.0069(6) | 0.0007(6)  | -0.0179(7) |
| C(51) | 0.0222(6) | 0.0223(7)  | 0.0227(6) | 0.0056(5)  | -0.0050(5) | -0.0107(5) |
| C(52) | 0.0366(8) | 0.0328(8)  | 0.0250(7) | 0.0050(6)  | 0.0009(6)  | -0.0059(7) |

|       |            |            |           |            |            |            |
|-------|------------|------------|-----------|------------|------------|------------|
| C(53) | 0.0509(11) | 0.0441(10) | 0.0263(8) | 0.0145(7)  | -0.0019(7) | -0.0105(8) |
| C(54) | 0.0397(9)  | 0.0338(9)  | 0.0399(9) | 0.0195(7)  | -0.0108(7) | -0.0100(7) |
| C(55) | 0.0239(7)  | 0.0259(7)  | 0.0392(8) | 0.0081(6)  | -0.0048(6) | -0.0055(6) |
| C(56) | 0.0220(7)  | 0.0253(7)  | 0.0268(7) | 0.0054(5)  | -0.0016(5) | -0.0101(6) |
| C(61) | 0.0177(6)  | 0.0202(6)  | 0.0212(6) | -0.0013(5) | -0.0019(5) | -0.0075(5) |
| C(62) | 0.0167(6)  | 0.0169(6)  | 0.0191(6) | -0.0019(5) | -0.0033(5) | -0.0058(5) |
| C(63) | 0.0220(6)  | 0.0198(6)  | 0.0207(6) | 0.0003(5)  | -0.0031(5) | -0.0075(5) |
| C(64) | 0.0244(7)  | 0.0176(6)  | 0.0281(7) | 0.0018(5)  | -0.0075(5) | -0.0048(5) |
| C(65) | 0.0173(6)  | 0.0211(7)  | 0.0353(8) | -0.0047(6) | -0.0014(5) | -0.0016(5) |
| C(66) | 0.0190(6)  | 0.0262(7)  | 0.0275(7) | -0.0038(6) | 0.0024(5)  | -0.0078(6) |

---

**Table S14.** Distances [Å] for [ $\{\text{PC}(\text{sp}^3)\text{HP}\}\text{Fe}(-\text{C}^{\text{Ar}}-\text{N}=\text{NPh})$ ] (**4**).

| atom-atom    | distance   | atom-atom    | distance   |
|--------------|------------|--------------|------------|
| Fe-C(62)     | 1.8693(13) | Fe-N(1)      | 1.9015(11) |
| Fe-C         | 2.0911(13) | Fe-P(2)      | 2.2399(4)  |
| Fe-P(1)      | 2.2589(4)  | P(1)-C(12)   | 1.8243(13) |
| P(1)-C(31)   | 1.8595(14) | P(1)-C(32)   | 1.8606(14) |
| P(2)-C(22)   | 1.8135(13) | P(2)-C(42)   | 1.8559(14) |
| P(2)-C(41)   | 1.8658(14) | N(1)-N(2)    | 1.3122(16) |
| N(1)-C(51)   | 1.4280(17) | N(2)-C(61)   | 1.3802(18) |
| C-C(11)      | 1.4999(18) | C-C(21)      | 1.5058(18) |
| C-H          | 1.004(18)  | C(11)-C(16)  | 1.4012(18) |
| C(11)-C(12)  | 1.4165(18) | C(12)-C(13)  | 1.3903(19) |
| C(13)-C(14)  | 1.3923(19) | C(13)-H(13)  | 0.9500     |
| C(14)-C(15)  | 1.385(2)   | C(14)-H(14)  | 0.9500     |
| C(15)-C(16)  | 1.389(2)   | C(15)-H(15)  | 0.9500     |
| C(16)-H(16)  | 0.9500     | C(21)-C(22)  | 1.4001(18) |
| C(21)-C(26)  | 1.4016(18) | C(22)-C(23)  | 1.3993(19) |
| C(23)-C(24)  | 1.383(2)   | C(23)-H(23)  | 0.9500     |
| C(24)-C(25)  | 1.396(2)   | C(24)-H(24)  | 0.9500     |
| C(25)-C(26)  | 1.386(2)   | C(25)-H(25)  | 0.9500     |
| C(26)-H(26)  | 0.9500     | C(31)-C(34)  | 1.527(2)   |
| C(31)-C(33)  | 1.530(2)   | C(31)-H(31)  | 1.0000     |
| C(32)-C(36)  | 1.533(2)   | C(32)-C(35)  | 1.538(2)   |
| C(32)-H(32)  | 1.0000     | C(33)-H(33A) | 0.9800     |
| C(33)-H(33B) | 0.9800     | C(33)-H(33C) | 0.9800     |
| C(34)-H(34A) | 0.9800     | C(34)-H(34B) | 0.9800     |
| C(34)-H(34C) | 0.9800     | C(35)-H(35A) | 0.9800     |
| C(35)-H(35B) | 0.9800     | C(35)-H(35C) | 0.9800     |
| C(36)-H(36A) | 0.9800     | C(36)-H(36B) | 0.9800     |
| C(36)-H(36C) | 0.9800     | C(41)-C(43)  | 1.527(2)   |
| C(41)-C(44)  | 1.531(2)   | C(41)-H(41)  | 1.0000     |
| C(42)-C(45)  | 1.531(2)   | C(42)-C(46)  | 1.532(2)   |
| C(42)-H(42)  | 1.0000     | C(43)-H(43A) | 0.9800     |
| C(43)-H(43B) | 0.9800     | C(43)-H(43C) | 0.9800     |
| C(44)-H(44A) | 0.9800     | C(44)-H(44B) | 0.9800     |
| C(44)-H(44C) | 0.9800     | C(45)-H(45A) | 0.9800     |
| C(45)-H(45B) | 0.9800     | C(45)-H(45C) | 0.9800     |
| C(46)-H(46A) | 0.9800     | C(46)-H(46B) | 0.9800     |
| C(46)-H(46C) | 0.9800     | C(51)-C(56)  | 1.390(2)   |
| C(51)-C(52)  | 1.395(2)   | C(52)-C(53)  | 1.388(2)   |
| C(52)-H(52)  | 0.9500     | C(53)-C(54)  | 1.383(3)   |
| C(53)-H(53)  | 0.9500     | C(54)-C(55)  | 1.383(2)   |
| C(54)-H(54)  | 0.9500     | C(55)-C(56)  | 1.392(2)   |
| C(55)-H(55)  | 0.9500     | C(56)-H(56)  | 0.9500     |
| C(61)-C(66)  | 1.4076(19) | C(61)-C(62)  | 1.4276(18) |
| C(62)-C(63)  | 1.4112(18) | C(63)-C(64)  | 1.383(2)   |
| C(63)-H(63)  | 0.9500     | C(64)-C(65)  | 1.405(2)   |

|             |        |             |          |
|-------------|--------|-------------|----------|
| C(64)-H(64) | 0.9500 | C(65)-C(66) | 1.377(2) |
| C(65)-H(65) | 0.9500 | C(66)-H(66) | 0.9500   |

---

**Table S15.** Angles [°] for [ $\{\text{PC}(\text{sp}^3)\text{HP}\}\text{Fe}(-\text{C}^{\text{Ar}}-\text{N}=\text{NPh})$ ] (4).

| atom-atom-atom      | angle      | atom-atom-atom      | angle       |
|---------------------|------------|---------------------|-------------|
| C(62)-Fe-N(1)       | 81.78(5)   | C(62)-Fe-C          | 96.72(5)    |
| N(1)-Fe-C           | 178.41(5)  | C(62)-Fe-P(2)       | 96.83(4)    |
| N(1)-Fe-P(2)        | 96.48(3)   | C-Fe-P(2)           | 83.13(4)    |
| C(62)-Fe-P(1)       | 99.86(4)   | N(1)-Fe-P(1)        | 101.23(3)   |
| C-Fe-P(1)           | 79.54(4)   | P(2)-Fe-P(1)        | 157.156(15) |
| C(12)-P(1)-C(31)    | 108.14(6)  | C(12)-P(1)-C(32)    | 105.30(6)   |
| C(31)-P(1)-C(32)    | 108.93(6)  | C(12)-P(1)-Fe       | 89.92(4)    |
| C(31)-P(1)-Fe       | 118.34(5)  | C(32)-P(1)-Fe       | 122.41(5)   |
| C(22)-P(2)-C(42)    | 104.44(6)  | C(22)-P(2)-C(41)    | 106.74(6)   |
| C(42)-P(2)-C(41)    | 102.43(6)  | C(22)-P(2)-Fe       | 105.39(4)   |
| C(42)-P(2)-Fe       | 124.37(5)  | C(41)-P(2)-Fe       | 112.20(5)   |
| N(2)-N(1)-C(51)     | 114.11(11) | N(2)-N(1)-Fe        | 120.19(9)   |
| C(51)-N(1)-Fe       | 125.64(9)  | N(1)-N(2)-C(61)     | 108.85(11)  |
| C(11)-C-C(21)       | 112.98(11) | C(11)-C-Fe          | 99.84(8)    |
| C(21)-C-Fe          | 116.95(9)  | C(11)-C-H           | 108.6(10)   |
| C(21)-C-H           | 107.8(10)  | Fe-C-H              | 110.3(10)   |
| C(16)-C(11)-C(12)   | 118.17(12) | C(16)-C(11)-C       | 125.21(12)  |
| C(12)-C(11)-C       | 116.46(11) | C(13)-C(12)-C(11)   | 120.38(12)  |
| C(13)-C(12)-P(1)    | 127.14(10) | C(11)-C(12)-P(1)    | 111.83(9)   |
| C(12)-C(13)-C(14)   | 120.30(13) | C(12)-C(13)-H(13)   | 119.9       |
| C(14)-C(13)-H(13)   | 119.9      | C(15)-C(14)-C(13)   | 119.79(13)  |
| C(15)-C(14)-H(14)   | 120.1      | C(13)-C(14)-H(14)   | 120.1       |
| C(14)-C(15)-C(16)   | 120.51(12) | C(14)-C(15)-H(15)   | 119.7       |
| C(16)-C(15)-H(15)   | 119.7      | C(15)-C(16)-C(11)   | 120.80(12)  |
| C(15)-C(16)-H(16)   | 119.6      | C(11)-C(16)-H(16)   | 119.6       |
| C(22)-C(21)-C(26)   | 118.39(12) | C(22)-C(21)-C       | 119.54(11)  |
| C(26)-C(21)-C       | 122.02(12) | C(23)-C(22)-C(21)   | 120.58(12)  |
| C(23)-C(22)-P(2)    | 126.48(10) | C(21)-C(22)-P(2)    | 112.92(10)  |
| C(24)-C(23)-C(22)   | 120.27(13) | C(24)-C(23)-H(23)   | 119.9       |
| C(22)-C(23)-H(23)   | 119.9      | C(23)-C(24)-C(25)   | 119.57(13)  |
| C(23)-C(24)-H(24)   | 120.2      | C(25)-C(24)-H(24)   | 120.2       |
| C(26)-C(25)-C(24)   | 120.37(13) | C(26)-C(25)-H(25)   | 119.8       |
| C(24)-C(25)-H(25)   | 119.8      | C(25)-C(26)-C(21)   | 120.77(13)  |
| C(25)-C(26)-H(26)   | 119.6      | C(21)-C(26)-H(26)   | 119.6       |
| C(34)-C(31)-C(33)   | 111.91(12) | C(34)-C(31)-P(1)    | 116.11(10)  |
| C(33)-C(31)-P(1)    | 111.76(11) | C(34)-C(31)-H(31)   | 105.3       |
| C(33)-C(31)-H(31)   | 105.3      | P(1)-C(31)-H(31)    | 105.3       |
| C(36)-C(32)-C(35)   | 109.91(12) | C(36)-C(32)-P(1)    | 112.13(10)  |
| C(35)-C(32)-P(1)    | 116.78(11) | C(36)-C(32)-H(32)   | 105.7       |
| C(35)-C(32)-H(32)   | 105.7      | P(1)-C(32)-H(32)    | 105.7       |
| C(31)-C(33)-H(33A)  | 109.5      | C(31)-C(33)-H(33B)  | 109.5       |
| H(33A)-C(33)-H(33B) | 109.5      | C(31)-C(33)-H(33C)  | 109.5       |
| H(33A)-C(33)-H(33C) | 109.5      | H(33B)-C(33)-H(33C) | 109.5       |
| C(31)-C(34)-H(34A)  | 109.5      | C(31)-C(34)-H(34B)  | 109.5       |

|                     |            |                     |            |
|---------------------|------------|---------------------|------------|
| H(34A)-C(34)-H(34B) | 109.5      | C(31)-C(34)-H(34C)  | 109.5      |
| H(34A)-C(34)-H(34C) | 109.5      | H(34B)-C(34)-H(34C) | 109.5      |
| C(32)-C(35)-H(35A)  | 109.5      | C(32)-C(35)-H(35B)  | 109.5      |
| H(35A)-C(35)-H(35B) | 109.5      | C(32)-C(35)-H(35C)  | 109.5      |
| H(35A)-C(35)-H(35C) | 109.5      | H(35B)-C(35)-H(35C) | 109.5      |
| C(32)-C(36)-H(36A)  | 109.5      | C(32)-C(36)-H(36B)  | 109.5      |
| H(36A)-C(36)-H(36B) | 109.5      | C(32)-C(36)-H(36C)  | 109.5      |
| H(36A)-C(36)-H(36C) | 109.5      | H(36B)-C(36)-H(36C) | 109.5      |
| C(43)-C(41)-C(44)   | 109.64(12) | C(43)-C(41)-P(2)    | 110.27(9)  |
| C(44)-C(41)-P(2)    | 115.80(10) | C(43)-C(41)-H(41)   | 106.9      |
| C(44)-C(41)-H(41)   | 106.9      | P(2)-C(41)-H(41)    | 106.9      |
| C(45)-C(42)-C(46)   | 111.40(13) | C(45)-C(42)-P(2)    | 112.93(10) |
| C(46)-C(42)-P(2)    | 110.50(10) | C(45)-C(42)-H(42)   | 107.2      |
| C(46)-C(42)-H(42)   | 107.2      | P(2)-C(42)-H(42)    | 107.2      |
| C(41)-C(43)-H(43A)  | 109.5      | C(41)-C(43)-H(43B)  | 109.5      |
| H(43A)-C(43)-H(43B) | 109.5      | C(41)-C(43)-H(43C)  | 109.5      |
| H(43A)-C(43)-H(43C) | 109.5      | H(43B)-C(43)-H(43C) | 109.5      |
| C(41)-C(44)-H(44A)  | 109.5      | C(41)-C(44)-H(44B)  | 109.5      |
| H(44A)-C(44)-H(44B) | 109.5      | C(41)-C(44)-H(44C)  | 109.5      |
| H(44A)-C(44)-H(44C) | 109.5      | H(44B)-C(44)-H(44C) | 109.5      |
| C(42)-C(45)-H(45A)  | 109.5      | C(42)-C(45)-H(45B)  | 109.5      |
| H(45A)-C(45)-H(45B) | 109.5      | C(42)-C(45)-H(45C)  | 109.5      |
| H(45A)-C(45)-H(45C) | 109.5      | H(45B)-C(45)-H(45C) | 109.5      |
| C(42)-C(46)-H(46A)  | 109.5      | C(42)-C(46)-H(46B)  | 109.5      |
| H(46A)-C(46)-H(46B) | 109.5      | C(42)-C(46)-H(46C)  | 109.5      |
| H(46A)-C(46)-H(46C) | 109.5      | H(46B)-C(46)-H(46C) | 109.5      |
| C(56)-C(51)-C(52)   | 119.79(13) | C(56)-C(51)-N(1)    | 117.48(12) |
| C(52)-C(51)-N(1)    | 122.71(13) | C(53)-C(52)-C(51)   | 119.40(15) |
| C(53)-C(52)-H(52)   | 120.3      | C(51)-C(52)-H(52)   | 120.3      |
| C(54)-C(53)-C(52)   | 120.71(16) | C(54)-C(53)-H(53)   | 119.6      |
| C(52)-C(53)-H(53)   | 119.6      | C(53)-C(54)-C(55)   | 120.11(15) |
| C(53)-C(54)-H(54)   | 119.9      | C(55)-C(54)-H(54)   | 119.9      |
| C(54)-C(55)-C(56)   | 119.68(15) | C(54)-C(55)-H(55)   | 120.2      |
| C(56)-C(55)-H(55)   | 120.2      | C(51)-C(56)-C(55)   | 120.30(14) |
| C(51)-C(56)-H(56)   | 119.8      | C(55)-C(56)-H(56)   | 119.8      |
| N(2)-C(61)-C(66)    | 120.15(12) | N(2)-C(61)-C(62)    | 117.73(12) |
| C(66)-C(61)-C(62)   | 122.02(12) | C(63)-C(62)-C(61)   | 116.41(12) |
| C(63)-C(62)-Fe      | 132.13(10) | C(61)-C(62)-Fe      | 111.43(9)  |
| C(64)-C(63)-C(62)   | 121.32(13) | C(64)-C(63)-H(63)   | 119.3      |
| C(62)-C(63)-H(63)   | 119.3      | C(63)-C(64)-C(65)   | 121.03(13) |
| C(63)-C(64)-H(64)   | 119.5      | C(65)-C(64)-H(64)   | 119.5      |
| C(66)-C(65)-C(64)   | 119.80(13) | C(66)-C(65)-H(65)   | 120.1      |
| C(64)-C(65)-H(65)   | 120.1      | C(65)-C(66)-C(61)   | 119.42(13) |
| C(65)-C(66)-H(66)   | 120.3      | C(61)-C(66)-H(66)   | 120.3      |

3.4 Crystal data for [ $\{PC(sp^3)HP\}Fe\{-C(sp^2)H-CH-Py-\}$ ] (5).

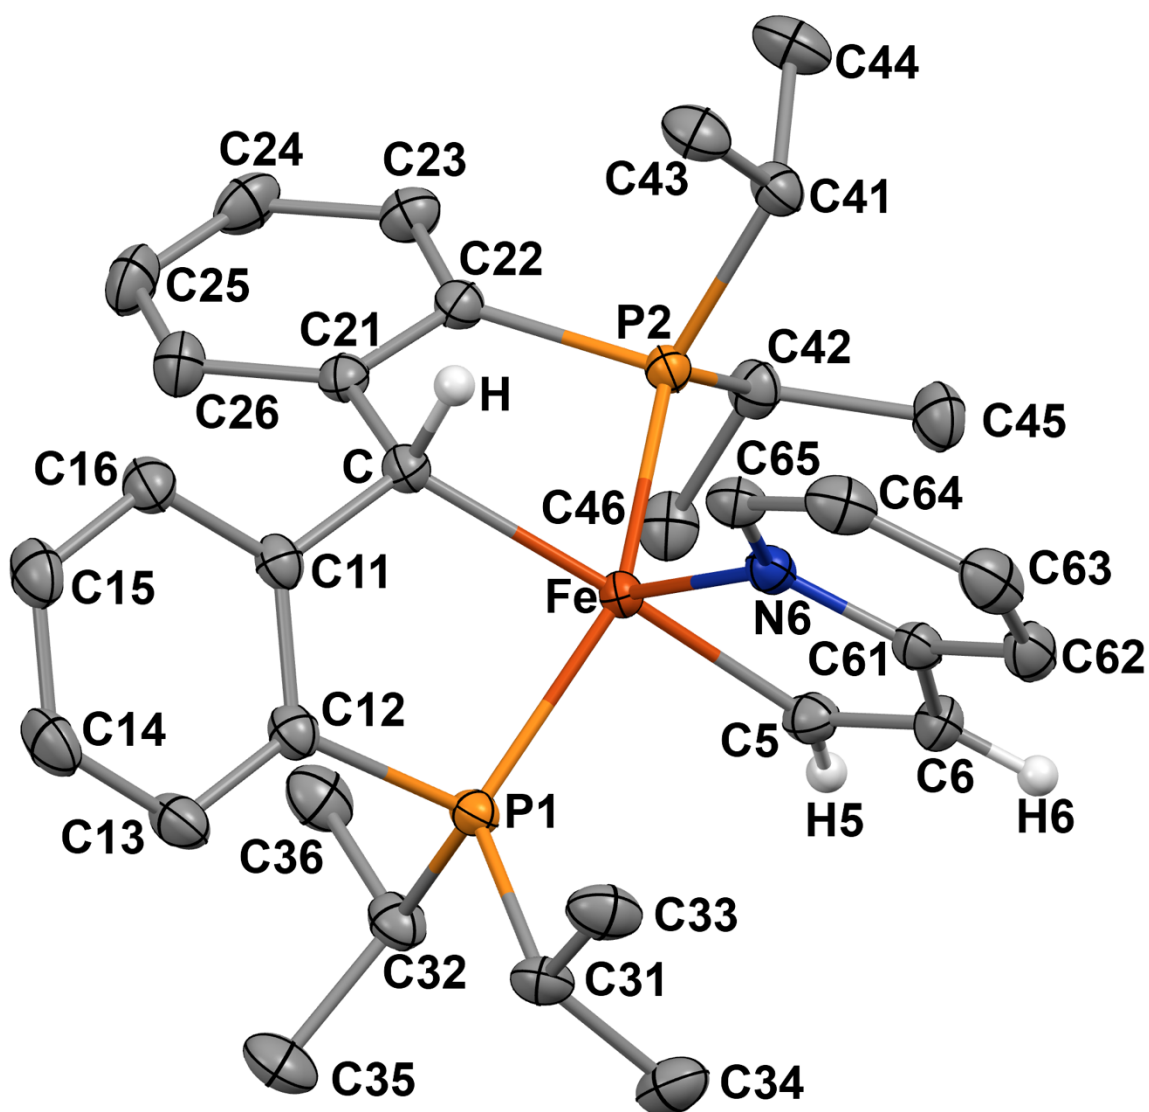

**Figure S14.** Thermal ellipsoid representation of [ $\{PC(sp^3)HP\}Fe\{-C(sp^2)H-CH-Py-\}$ ] (5) at the 50% probability level. Most hydrogen atoms omitted for clarity.

**Table S16.** Crystal data and structural refinement for [ $\{\text{PC}(\text{sp}^3)\text{HP}\}\text{Fe}\{-\text{C}(\text{sp}^2)\text{H-CH-Py-}\}$ ] (**5**).

|                                             |                                                               |
|---------------------------------------------|---------------------------------------------------------------|
| Identification code                         | ZL_V_271_a                                                    |
| Empirical formula                           | $\text{C}_{32}\text{H}_{43}\text{FeNP}_2$                     |
| Formula weight                              | 559.46                                                        |
| Temperature                                 | 120(2) K                                                      |
| Wavelength                                  | 1.54178 Å                                                     |
| Crystal system                              | Monoclinic                                                    |
| Space group                                 | $P2_1/c$                                                      |
| <i>a</i>                                    | 9.7026(3) Å                                                   |
| <i>b</i>                                    | 19.8324(7) Å                                                  |
| <i>c</i>                                    | 15.2623(7) Å                                                  |
| $\alpha$                                    | 90°                                                           |
| $\beta$                                     | 93.4120(10)°                                                  |
| $\gamma$                                    | 90°                                                           |
| Volume                                      | 2931.66(19) Å <sup>3</sup>                                    |
| <i>Z</i>                                    | 4                                                             |
| Density (calculated)                        | 1.268 g.cm <sup>-3</sup>                                      |
| Absorption coefficient ( $\mu$ )            | 5.299 mm <sup>-1</sup>                                        |
| F(000)                                      | 1192                                                          |
| Crystal size                                | 0.192 × 0.173 × 0.112 mm <sup>3</sup>                         |
| $\theta$ range for data collection          | 3.658 to 72.427°                                              |
| Index ranges                                | -12 ≤ <i>h</i> ≤ 10, -24 ≤ <i>k</i> ≤ 24, -18 ≤ <i>l</i> ≤ 18 |
| Reflections collected                       | 72837                                                         |
| Independent reflections                     | 5783 [ $R_{\text{int}} = 0.0443$ ]                            |
| Completeness to $\theta = 67.679^\circ$     | 99.9 %                                                        |
| Absorption correction                       | Semi-empirical from equivalents                               |
| Max. and min. transmission                  | 0.7536 and 0.4755                                             |
| Refinement method                           | Full-matrix least-squares on $F^2$                            |
| Data / restraints / parameters              | 5783 / 0 / 339                                                |
| Goodness-of-fit on $F^2$                    | 1.033                                                         |
| Final <i>R</i> indices [ $I > 2\sigma(I)$ ] | $R_1 = 0.0230$ , $wR_2 = 0.0589$                              |
| <i>R</i> indices (all data)                 | $R_1 = 0.0244$ , $wR_2 = 0.0601$                              |
| Extinction coefficient                      | n/a                                                           |
| Largest diff. peak and hole                 | 0.296 and -0.186 e <sup>-</sup> .Å <sup>-3</sup>              |



**Table S17.** Atomic coordinates and equivalent isotropic displacement parameters ( $\text{\AA}^2$ ) for [ $\{\text{PC}(\text{sp}^3)\text{HP}\}\text{Fe}\{-\text{C}(\text{sp}^2)\text{H}-\text{CH}-\text{Py}-\}$ ] (**5**).  $U(\text{eq})$  is defined as one third of the trace of the orthogonalized  $U_{ij}$  tensor.

| atom  | x           | y          | z           | $U(\text{eq})$ |
|-------|-------------|------------|-------------|----------------|
| Fe    | 0.67970(2)  | 0.61515(2) | 0.31850(2)  | 0.015(1)       |
| P(1)  | 0.87633(3)  | 0.56361(2) | 0.28983(2)  | 0.018(1)       |
| C     | 0.77601(12) | 0.69924(6) | 0.26440(8)  | 0.018(1)       |
| P(2)  | 0.55830(3)  | 0.69579(2) | 0.38425(2)  | 0.017(1)       |
| C(5)  | 0.60205(13) | 0.53835(6) | 0.38025(8)  | 0.021(1)       |
| N(6)  | 0.54614(10) | 0.57834(5) | 0.21781(7)  | 0.018(1)       |
| C(6)  | 0.50430(13) | 0.50262(6) | 0.33256(9)  | 0.023(1)       |
| C(11) | 0.90197(12) | 0.68543(6) | 0.21311(8)  | 0.019(1)       |
| C(12) | 0.96460(13) | 0.62181(6) | 0.21926(8)  | 0.021(1)       |
| C(13) | 1.07974(14) | 0.60735(7) | 0.17127(9)  | 0.027(1)       |
| C(14) | 1.13238(14) | 0.65583(8) | 0.11713(10) | 0.031(1)       |
| C(15) | 1.07030(14) | 0.71896(8) | 0.10982(9)  | 0.029(1)       |
| C(16) | 0.95677(13) | 0.73352(7) | 0.15749(9)  | 0.024(1)       |
| C(21) | 0.79216(12) | 0.75476(6) | 0.33166(8)  | 0.019(1)       |
| C(22) | 0.68416(12) | 0.76436(6) | 0.38824(8)  | 0.019(1)       |
| C(23) | 0.69051(14) | 0.81583(6) | 0.45038(9)  | 0.024(1)       |
| C(24) | 0.80668(15) | 0.85638(7) | 0.46180(9)  | 0.028(1)       |
| C(25) | 0.91563(15) | 0.84587(7) | 0.40900(10) | 0.030(1)       |
| C(26) | 0.90839(14) | 0.79644(7) | 0.34419(9)  | 0.025(1)       |
| C(31) | 0.89071(13) | 0.48058(6) | 0.23440(9)  | 0.024(1)       |
| C(32) | 0.99286(13) | 0.55457(7) | 0.39055(8)  | 0.024(1)       |
| C(33) | 0.80443(15) | 0.48028(7) | 0.14701(9)  | 0.030(1)       |
| C(34) | 0.84821(17) | 0.42281(7) | 0.29344(10) | 0.033(1)       |
| C(35) | 1.13669(14) | 0.52616(8) | 0.37618(10) | 0.034(1)       |
| C(36) | 1.00367(15) | 0.62226(7) | 0.43826(9)  | 0.030(1)       |
| C(41) | 0.39461(12) | 0.73054(7) | 0.33233(9)  | 0.023(1)       |
| C(42) | 0.51956(13) | 0.68609(6) | 0.50130(8)  | 0.022(1)       |
| C(43) | 0.41743(14) | 0.75535(7) | 0.23945(9)  | 0.029(1)       |
| C(44) | 0.32966(15) | 0.78670(8) | 0.38497(10) | 0.034(1)       |
| C(45) | 0.39766(14) | 0.63805(7) | 0.51118(9)  | 0.028(1)       |
| C(46) | 0.64826(14) | 0.66231(7) | 0.55521(9)  | 0.026(1)       |
| C(61) | 0.47466(12) | 0.52272(6) | 0.24281(8)  | 0.020(1)       |
| C(62) | 0.38638(13) | 0.48838(7) | 0.18120(9)  | 0.026(1)       |

|        |             |            |             |          |
|--------|-------------|------------|-------------|----------|
| C(63)  | 0.37314(14) | 0.51034(7) | 0.09541(10) | 0.029(1) |
| C(64)  | 0.44730(14) | 0.56659(7) | 0.07055(9)  | 0.027(1) |
| C(65)  | 0.53139(13) | 0.59854(6) | 0.13371(8)  | 0.022(1) |
| H      | 0.6996(17)  | 0.7130(8)  | 0.2207(11)  | 0.027    |
| H(5)   | 0.6216(18)  | 0.5235(9)  | 0.4395(12)  | 0.032    |
| H(6)   | 0.4575      | 0.4659     | 0.3575      | 0.027    |
| H(13)  | 1.1218      | 0.5641     | 0.1759      | 0.033    |
| H(14)  | 1.2108      | 0.6460     | 0.0850      | 0.037    |
| H(15)  | 1.1057      | 0.7521     | 0.0722      | 0.034    |
| H(16)  | 0.9153      | 0.7769     | 0.1524      | 0.028    |
| H(23)  | 0.6143      | 0.8233     | 0.4854      | 0.029    |
| H(24)  | 0.8113      | 0.8908     | 0.5052      | 0.034    |
| H(25)  | 0.9964      | 0.8727     | 0.4171      | 0.036    |
| H(26)  | 0.9836      | 0.7908     | 0.3078      | 0.031    |
| H(31)  | 0.9896      | 0.4737     | 0.2215      | 0.028    |
| H(32)  | 0.9472      | 0.5224     | 0.4302      | 0.029    |
| H(33A) | 0.8199      | 0.4380     | 0.1159      | 0.045    |
| H(33B) | 0.8318      | 0.5184     | 0.1110      | 0.045    |
| H(33C) | 0.7064      | 0.4843     | 0.1582      | 0.045    |
| H(34A) | 0.8586      | 0.3798     | 0.2629      | 0.049    |
| H(34B) | 0.7517      | 0.4287     | 0.3074      | 0.049    |
| H(34C) | 0.9072      | 0.4229     | 0.3478      | 0.049    |
| H(35A) | 1.1889      | 0.5218     | 0.4329      | 0.050    |
| H(35B) | 1.1855      | 0.5567     | 0.3382      | 0.050    |
| H(35C) | 1.1276      | 0.4817     | 0.3483      | 0.050    |
| H(36A) | 1.0567      | 0.6166     | 0.4945      | 0.045    |
| H(36B) | 0.9109      | 0.6387     | 0.4488      | 0.045    |
| H(36C) | 1.0504      | 0.6549     | 0.4021      | 0.045    |
| H(41)  | 0.3266      | 0.6927     | 0.3270      | 0.027    |
| H(42)  | 0.4932      | 0.7313     | 0.5239      | 0.026    |
| H(43A) | 0.3296      | 0.7712     | 0.2117      | 0.043    |
| H(43B) | 0.4531      | 0.7183     | 0.2049      | 0.043    |
| H(43C) | 0.4842      | 0.7925     | 0.2422      | 0.043    |
| H(44A) | 0.2417      | 0.8004     | 0.3553      | 0.051    |
| H(44B) | 0.3923      | 0.8255     | 0.3893      | 0.051    |
| H(44C) | 0.3133      | 0.7702     | 0.4440      | 0.051    |
| H(45A) | 0.3795      | 0.6338     | 0.5734      | 0.043    |

|        |        |        |        |       |
|--------|--------|--------|--------|-------|
| H(45B) | 0.4201 | 0.5936 | 0.4877 | 0.043 |
| H(45C) | 0.3155 | 0.6560 | 0.4787 | 0.043 |
| H(46A) | 0.6285 | 0.6603 | 0.6174 | 0.040 |
| H(46B) | 0.7241 | 0.6940 | 0.5475 | 0.040 |
| H(46C) | 0.6746 | 0.6174 | 0.5353 | 0.040 |
| H(62)  | 0.3360 | 0.4501 | 0.1988 | 0.031 |
| H(63)  | 0.3139 | 0.4873 | 0.0536 | 0.035 |
| H(64)  | 0.4402 | 0.5825 | 0.0118 | 0.032 |
| H(65)  | 0.5818 | 0.6370 | 0.1168 | 0.026 |

---

**Table S18.** Anisotropic displacement parameters ( $\text{\AA}^2$ ) for [ $\{\text{PC}(\text{sp}^3)\text{HP}\}\text{Fe}\{-\text{C}(\text{sp}^2)\text{H}-\text{CH}-\text{Py}-\}$ ] (5). The anisotropic displacement factor exponent takes the form:  $-2\pi^2[h^2a^*U_{11} + \dots + 2hka^*b^*U_{12}]$

| Atom  | $U_{11}$  | $U_{22}$  | $U_{33}$  | $U_{23}$   | $U_{13}$   | $U_{12}$   |
|-------|-----------|-----------|-----------|------------|------------|------------|
| Fe    | 0.0133(1) | 0.0151(1) | 0.0169(1) | 0.0004(1)  | 0.0004(1)  | -0.0006(1) |
| P(1)  | 0.0154(1) | 0.0188(1) | 0.0194(2) | 0.0013(1)  | 0.0007(1)  | 0.0025(1)  |
| C     | 0.0155(5) | 0.0183(5) | 0.0204(6) | 0.0013(4)  | 0.0003(4)  | -0.0004(4) |
| P(2)  | 0.0143(1) | 0.0172(1) | 0.0184(1) | -0.0006(1) | 0.0015(1)  | -0.0004(1) |
| C(5)  | 0.0226(6) | 0.0197(6) | 0.0212(6) | 0.0030(5)  | 0.0027(5)  | 0.0024(5)  |
| N(6)  | 0.0166(5) | 0.0181(5) | 0.0198(5) | -0.0017(4) | 0.0010(4)  | 0.0019(4)  |
| C(6)  | 0.0215(6) | 0.0190(6) | 0.0277(6) | 0.0032(5)  | 0.0047(5)  | -0.0019(5) |
| C(11) | 0.0157(5) | 0.0235(6) | 0.0187(6) | 0.0000(5)  | -0.0010(4) | -0.0008(4) |
| C(12) | 0.0174(6) | 0.0245(6) | 0.0198(6) | 0.0018(5)  | 0.0000(5)  | 0.0004(5)  |
| C(13) | 0.0197(6) | 0.0322(7) | 0.0302(7) | 0.0026(5)  | 0.0040(5)  | 0.0066(5)  |
| C(14) | 0.0191(6) | 0.0423(8) | 0.0314(7) | 0.0032(6)  | 0.0088(5)  | 0.0030(6)  |
| C(15) | 0.0220(6) | 0.0368(7) | 0.0276(7) | 0.0073(6)  | 0.0058(5)  | -0.0031(5) |
| C(16) | 0.0198(6) | 0.0264(6) | 0.0250(6) | 0.0046(5)  | 0.0012(5)  | 0.0000(5)  |
| C(21) | 0.0182(5) | 0.0170(5) | 0.0209(6) | 0.0032(4)  | -0.0011(4) | -0.0003(4) |
| C(22) | 0.0182(6) | 0.0179(5) | 0.0209(6) | 0.0012(4)  | -0.0010(4) | -0.0004(4) |
| C(23) | 0.0276(6) | 0.0210(6) | 0.0244(6) | -0.0012(5) | 0.0019(5)  | 0.0006(5)  |
| C(24) | 0.0375(7) | 0.0191(6) | 0.0275(7) | -0.0038(5) | -0.0028(6) | -0.0047(5) |
| C(25) | 0.0297(7) | 0.0258(7) | 0.0340(7) | 0.0000(6)  | -0.0022(6) | -0.0116(5) |
| C(26) | 0.0227(6) | 0.0259(6) | 0.0279(7) | 0.0008(5)  | 0.0023(5)  | -0.0058(5) |
| C(31) | 0.0232(6) | 0.0215(6) | 0.0262(6) | -0.0010(5) | 0.0025(5)  | 0.0062(5)  |
| C(32) | 0.0198(6) | 0.0298(7) | 0.0229(6) | 0.0047(5)  | -0.0021(5) | 0.0025(5)  |
| C(33) | 0.0328(7) | 0.0270(7) | 0.0289(7) | -0.0067(5) | -0.0019(6) | 0.0082(5)  |
| C(34) | 0.0418(8) | 0.0203(6) | 0.0363(8) | 0.0011(6)  | 0.0051(6)  | 0.0038(6)  |
| C(35) | 0.0233(7) | 0.0416(8) | 0.0346(8) | 0.0012(6)  | -0.0058(6) | 0.0099(6)  |
| C(36) | 0.0254(7) | 0.0381(8) | 0.0263(7) | -0.0030(6) | -0.0061(5) | 0.0021(6)  |
| C(41) | 0.0166(6) | 0.0244(6) | 0.0274(6) | -0.0001(5) | -0.0010(5) | 0.0020(5)  |
| C(42) | 0.0223(6) | 0.0232(6) | 0.0207(6) | -0.0009(5) | 0.0049(5)  | -0.0013(5) |
| C(43) | 0.0252(6) | 0.0323(7) | 0.0273(7) | 0.0023(5)  | -0.0035(5) | 0.0069(5)  |
| C(44) | 0.0280(7) | 0.0383(8) | 0.0357(8) | -0.0017(6) | 0.0024(6)  | 0.0139(6)  |
| C(45) | 0.0240(6) | 0.0322(7) | 0.0300(7) | 0.0029(6)  | 0.0080(5)  | -0.0045(5) |
| C(46) | 0.0281(7) | 0.0317(7) | 0.0194(6) | 0.0010(5)  | -0.0001(5) | -0.0037(5) |
| C(61) | 0.0161(5) | 0.0187(6) | 0.0263(6) | -0.0027(5) | 0.0026(5)  | 0.0017(4)  |
| C(62) | 0.0203(6) | 0.0231(6) | 0.0339(7) | -0.0065(5) | 0.0007(5)  | -0.0022(5) |

|       |           |           |           |            |            |           |
|-------|-----------|-----------|-----------|------------|------------|-----------|
| C(63) | 0.0241(6) | 0.0313(7) | 0.0317(7) | -0.0117(6) | -0.0052(5) | 0.0014(5) |
| C(64) | 0.0291(7) | 0.0298(7) | 0.0217(6) | -0.0039(5) | -0.0031(5) | 0.0064(5) |
| C(65) | 0.0225(6) | 0.0209(6) | 0.0211(6) | -0.0010(5) | 0.0015(5)  | 0.0031(5) |

---

**Table S19.** Distances [Å] for [ $\{\text{PC}(\text{sp}^3)\text{HP}\}\text{Fe}\{-\text{C}(\text{sp}^2)\text{H}-\text{CH}-\text{Py}-\}$ ] (5).

| atom-atom    | distance   | atom-atom    | distance   |
|--------------|------------|--------------|------------|
| Fe-C(5)      | 1.9648(12) | Fe-N(6)      | 2.0824(10) |
| Fe-C         | 2.1043(12) | Fe-P(1)      | 2.2305(3)  |
| Fe-P(2)      | 2.2568(3)  | P(1)-C(12)   | 1.8264(13) |
| P(1)-C(31)   | 1.8604(13) | P(1)-C(32)   | 1.8620(13) |
| C-C(21)      | 1.5073(17) | C-C(11)      | 1.5150(16) |
| C-H          | 1.005(17)  | P(2)-C(22)   | 1.8263(12) |
| P(2)-C(42)   | 1.8573(13) | P(2)-C(41)   | 1.8643(13) |
| C(5)-C(6)    | 1.3598(18) | C(5)-H(5)    | 0.960(18)  |
| N(6)-C(65)   | 1.3441(16) | N(6)-C(61)   | 1.3692(16) |
| C(6)-C(61)   | 1.4391(18) | C(6)-H(6)    | 0.9500     |
| C(11)-C(12)  | 1.4012(17) | C(11)-C(16)  | 1.4024(18) |
| C(12)-C(13)  | 1.4015(18) | C(13)-C(14)  | 1.385(2)   |
| C(13)-H(13)  | 0.9500     | C(14)-C(15)  | 1.391(2)   |
| C(14)-H(14)  | 0.9500     | C(15)-C(16)  | 1.3862(19) |
| C(15)-H(15)  | 0.9500     | C(16)-H(16)  | 0.9500     |
| C(21)-C(26)  | 1.4021(17) | C(21)-C(22)  | 1.4099(17) |
| C(22)-C(23)  | 1.3923(18) | C(23)-C(24)  | 1.3872(19) |
| C(23)-H(23)  | 0.9500     | C(24)-C(25)  | 1.383(2)   |
| C(24)-H(24)  | 0.9500     | C(25)-C(26)  | 1.391(2)   |
| C(25)-H(25)  | 0.9500     | C(26)-H(26)  | 0.9500     |
| C(31)-C(34)  | 1.5294(19) | C(31)-C(33)  | 1.5319(18) |
| C(31)-H(31)  | 1.0000     | C(32)-C(36)  | 1.528(2)   |
| C(32)-C(35)  | 1.5327(18) | C(32)-H(32)  | 1.0000     |
| C(33)-H(33A) | 0.9800     | C(33)-H(33B) | 0.9800     |
| C(33)-H(33C) | 0.9800     | C(34)-H(34A) | 0.9800     |
| C(34)-H(34B) | 0.9800     | C(34)-H(34C) | 0.9800     |
| C(35)-H(35A) | 0.9800     | C(35)-H(35B) | 0.9800     |
| C(35)-H(35C) | 0.9800     | C(36)-H(36A) | 0.9800     |
| C(36)-H(36B) | 0.9800     | C(36)-H(36C) | 0.9800     |
| C(41)-C(43)  | 1.5290(19) | C(41)-C(44)  | 1.5309(19) |
| C(41)-H(41)  | 1.0000     | C(42)-C(46)  | 1.5285(18) |
| C(42)-C(45)  | 1.5332(18) | C(42)-H(42)  | 1.0000     |
| C(43)-H(43A) | 0.9800     | C(43)-H(43B) | 0.9800     |
| C(43)-H(43C) | 0.9800     | C(44)-H(44A) | 0.9800     |
| C(44)-H(44B) | 0.9800     | C(44)-H(44C) | 0.9800     |
| C(45)-H(45A) | 0.9800     | C(45)-H(45B) | 0.9800     |
| C(45)-H(45C) | 0.9800     | C(46)-H(46A) | 0.9800     |
| C(46)-H(46B) | 0.9800     | C(46)-H(46C) | 0.9800     |
| C(61)-C(62)  | 1.4092(18) | C(62)-C(63)  | 1.378(2)   |
| C(62)-H(62)  | 0.9500     | C(63)-C(64)  | 1.392(2)   |
| C(63)-H(63)  | 0.9500     | C(64)-C(65)  | 1.3794(18) |
| C(64)-H(64)  | 0.9500     | C(65)-H(65)  | 0.9500     |

**Table S20.** Angles [°] for [ $\{PC(sp^3)HP\}Fe\{-C(sp^2)H-CH-Py-\}$ ] (5).

| atom-atom-atom     | angle      | atom-atom-atom      | angle       |
|--------------------|------------|---------------------|-------------|
| C(5)-Fe-N(6)       | 80.95(5)   | C(5)-Fe-C           | 174.00(5)   |
| N(6)-Fe-C          | 105.05(4)  | C(5)-Fe-P(1)        | 95.50(4)    |
| N(6)-Fe-P(1)       | 101.34(3)  | C-Fe-P(1)           | 83.18(3)    |
| C(5)-Fe-P(2)       | 96.36(4)   | N(6)-Fe-P(2)        | 104.96(3)   |
| C-Fe-P(2)          | 82.45(3)   | P(1)-Fe-P(2)        | 152.515(14) |
| C(12)-P(1)-C(31)   | 103.93(6)  | C(12)-P(1)-C(32)    | 105.35(6)   |
| C(31)-P(1)-C(32)   | 103.41(6)  | C(12)-P(1)-Fe       | 105.23(4)   |
| C(31)-P(1)-Fe      | 125.66(4)  | C(32)-P(1)-Fe       | 111.51(4)   |
| C(21)-C-C(11)      | 115.44(10) | C(21)-C-Fe          | 110.02(8)   |
| C(11)-C-Fe         | 116.76(8)  | C(21)-C-H           | 107.2(9)    |
| C(11)-C-H          | 107.0(9)   | Fe-C-H              | 98.5(9)     |
| C(22)-P(2)-C(42)   | 102.60(6)  | C(22)-P(2)-C(41)    | 106.85(6)   |
| C(42)-P(2)-C(41)   | 103.36(6)  | C(22)-P(2)-Fe       | 100.19(4)   |
| C(42)-P(2)-Fe      | 119.68(4)  | C(41)-P(2)-Fe       | 121.80(4)   |
| C(6)-C(5)-Fe       | 114.98(9)  | C(6)-C(5)-H(5)      | 115.9(10)   |
| Fe-C(5)-H(5)       | 129.1(10)  | C(65)-N(6)-C(61)    | 118.64(11)  |
| C(65)-N(6)-Fe      | 128.79(8)  | C(61)-N(6)-Fe       | 112.34(8)   |
| C(5)-C(6)-C(61)    | 117.30(11) | C(5)-C(6)-H(6)      | 121.3       |
| C(61)-C(6)-H(6)    | 121.3      | C(12)-C(11)-C(16)   | 118.32(11)  |
| C(12)-C(11)-C      | 119.22(11) | C(16)-C(11)-C       | 122.44(11)  |
| C(11)-C(12)-C(13)  | 120.35(12) | C(11)-C(12)-P(1)    | 113.07(9)   |
| C(13)-C(12)-P(1)   | 126.53(10) | C(14)-C(13)-C(12)   | 120.23(13)  |
| C(14)-C(13)-H(13)  | 119.9      | C(12)-C(13)-H(13)   | 119.9       |
| C(13)-C(14)-C(15)  | 119.97(12) | C(13)-C(14)-H(14)   | 120.0       |
| C(15)-C(14)-H(14)  | 120.0      | C(16)-C(15)-C(14)   | 119.95(13)  |
| C(16)-C(15)-H(15)  | 120.0      | C(14)-C(15)-H(15)   | 120.0       |
| C(15)-C(16)-C(11)  | 121.18(12) | C(15)-C(16)-H(16)   | 119.4       |
| C(11)-C(16)-H(16)  | 119.4      | C(26)-C(21)-C(22)   | 117.26(11)  |
| C(26)-C(21)-C      | 125.01(11) | C(22)-C(21)-C       | 117.70(10)  |
| C(23)-C(22)-C(21)  | 120.79(11) | C(23)-C(22)-P(2)    | 124.83(10)  |
| C(21)-C(22)-P(2)   | 113.51(9)  | C(24)-C(23)-C(22)   | 120.89(12)  |
| C(24)-C(23)-H(23)  | 119.6      | C(22)-C(23)-H(23)   | 119.6       |
| C(25)-C(24)-C(23)  | 118.89(12) | C(25)-C(24)-H(24)   | 120.6       |
| C(23)-C(24)-H(24)  | 120.6      | C(24)-C(25)-C(26)   | 120.84(12)  |
| C(24)-C(25)-H(25)  | 119.6      | C(26)-C(25)-H(25)   | 119.6       |
| C(25)-C(26)-C(21)  | 121.23(12) | C(25)-C(26)-H(26)   | 119.4       |
| C(21)-C(26)-H(26)  | 119.4      | C(34)-C(31)-C(33)   | 110.95(12)  |
| C(34)-C(31)-P(1)   | 111.41(9)  | C(33)-C(31)-P(1)    | 110.33(9)   |
| C(34)-C(31)-H(31)  | 108.0      | C(33)-C(31)-H(31)   | 108.0       |
| P(1)-C(31)-H(31)   | 108.0      | C(36)-C(32)-C(35)   | 110.73(11)  |
| C(36)-C(32)-P(1)   | 109.26(9)  | C(35)-C(32)-P(1)    | 115.50(10)  |
| C(36)-C(32)-H(32)  | 107.0      | C(35)-C(32)-H(32)   | 107.0       |
| P(1)-C(32)-H(32)   | 107.0      | C(31)-C(33)-H(33A)  | 109.5       |
| C(31)-C(33)-H(33B) | 109.5      | H(33A)-C(33)-H(33B) | 109.5       |
| C(31)-C(33)-H(33C) | 109.5      | H(33A)-C(33)-H(33C) | 109.5       |

|                     |            |                     |            |
|---------------------|------------|---------------------|------------|
| H(33B)-C(33)-H(33C) | 109.5      | C(31)-C(34)-H(34A)  | 109.5      |
| C(31)-C(34)-H(34B)  | 109.5      | H(34A)-C(34)-H(34B) | 109.5      |
| C(31)-C(34)-H(34C)  | 109.5      | H(34A)-C(34)-H(34C) | 109.5      |
| H(34B)-C(34)-H(34C) | 109.5      | C(32)-C(35)-H(35A)  | 109.5      |
| C(32)-C(35)-H(35B)  | 109.5      | H(35A)-C(35)-H(35B) | 109.5      |
| C(32)-C(35)-H(35C)  | 109.5      | H(35A)-C(35)-H(35C) | 109.5      |
| H(35B)-C(35)-H(35C) | 109.5      | C(32)-C(36)-H(36A)  | 109.5      |
| C(32)-C(36)-H(36B)  | 109.5      | H(36A)-C(36)-H(36B) | 109.5      |
| C(32)-C(36)-H(36C)  | 109.5      | H(36A)-C(36)-H(36C) | 109.5      |
| H(36B)-C(36)-H(36C) | 109.5      | C(43)-C(41)-C(44)   | 109.83(11) |
| C(43)-C(41)-P(2)    | 110.27(9)  | C(44)-C(41)-P(2)    | 114.38(9)  |
| C(43)-C(41)-H(41)   | 107.4      | C(44)-C(41)-H(41)   | 107.4      |
| P(2)-C(41)-H(41)    | 107.4      | C(46)-C(42)-C(45)   | 111.44(11) |
| C(46)-C(42)-P(2)    | 110.13(9)  | C(45)-C(42)-P(2)    | 111.12(9)  |
| C(46)-C(42)-H(42)   | 108.0      | C(45)-C(42)-H(42)   | 108.0      |
| P(2)-C(42)-H(42)    | 108.0      | C(41)-C(43)-H(43A)  | 109.5      |
| C(41)-C(43)-H(43B)  | 109.5      | H(43A)-C(43)-H(43B) | 109.5      |
| C(41)-C(43)-H(43C)  | 109.5      | H(43A)-C(43)-H(43C) | 109.5      |
| H(43B)-C(43)-H(43C) | 109.5      | C(41)-C(44)-H(44A)  | 109.5      |
| C(41)-C(44)-H(44B)  | 109.5      | H(44A)-C(44)-H(44B) | 109.5      |
| C(41)-C(44)-H(44C)  | 109.5      | H(44A)-C(44)-H(44C) | 109.5      |
| H(44B)-C(44)-H(44C) | 109.5      | C(42)-C(45)-H(45A)  | 109.5      |
| C(42)-C(45)-H(45B)  | 109.5      | H(45A)-C(45)-H(45B) | 109.5      |
| C(42)-C(45)-H(45C)  | 109.5      | H(45A)-C(45)-H(45C) | 109.5      |
| H(45B)-C(45)-H(45C) | 109.5      | C(42)-C(46)-H(46A)  | 109.5      |
| C(42)-C(46)-H(46B)  | 109.5      | H(46A)-C(46)-H(46B) | 109.5      |
| C(42)-C(46)-H(46C)  | 109.5      | H(46A)-C(46)-H(46C) | 109.5      |
| H(46B)-C(46)-H(46C) | 109.5      | N(6)-C(61)-C(62)    | 120.08(12) |
| N(6)-C(61)-C(6)     | 114.36(11) | C(62)-C(61)-C(6)    | 125.48(12) |
| C(63)-C(62)-C(61)   | 119.98(12) | C(63)-C(62)-H(62)   | 120.0      |
| C(61)-C(62)-H(62)   | 120.0      | C(62)-C(63)-C(64)   | 119.43(12) |
| C(62)-C(63)-H(63)   | 120.3      | C(64)-C(63)-H(63)   | 120.3      |
| C(65)-C(64)-C(63)   | 118.12(13) | C(65)-C(64)-H(64)   | 120.9      |
| C(63)-C(64)-H(64)   | 120.9      | N(6)-C(65)-C(64)    | 123.74(12) |
| N(6)-C(65)-H(65)    | 118.1      | C(64)-C(65)-H(65)   | 118.1      |



3.5 Crystal data for [ $\{PC(sp^3)HP\}Fe\{-C(sp^2)H-CH-Py-\}(NC'Bu)\}$  (6-NC'Bu).

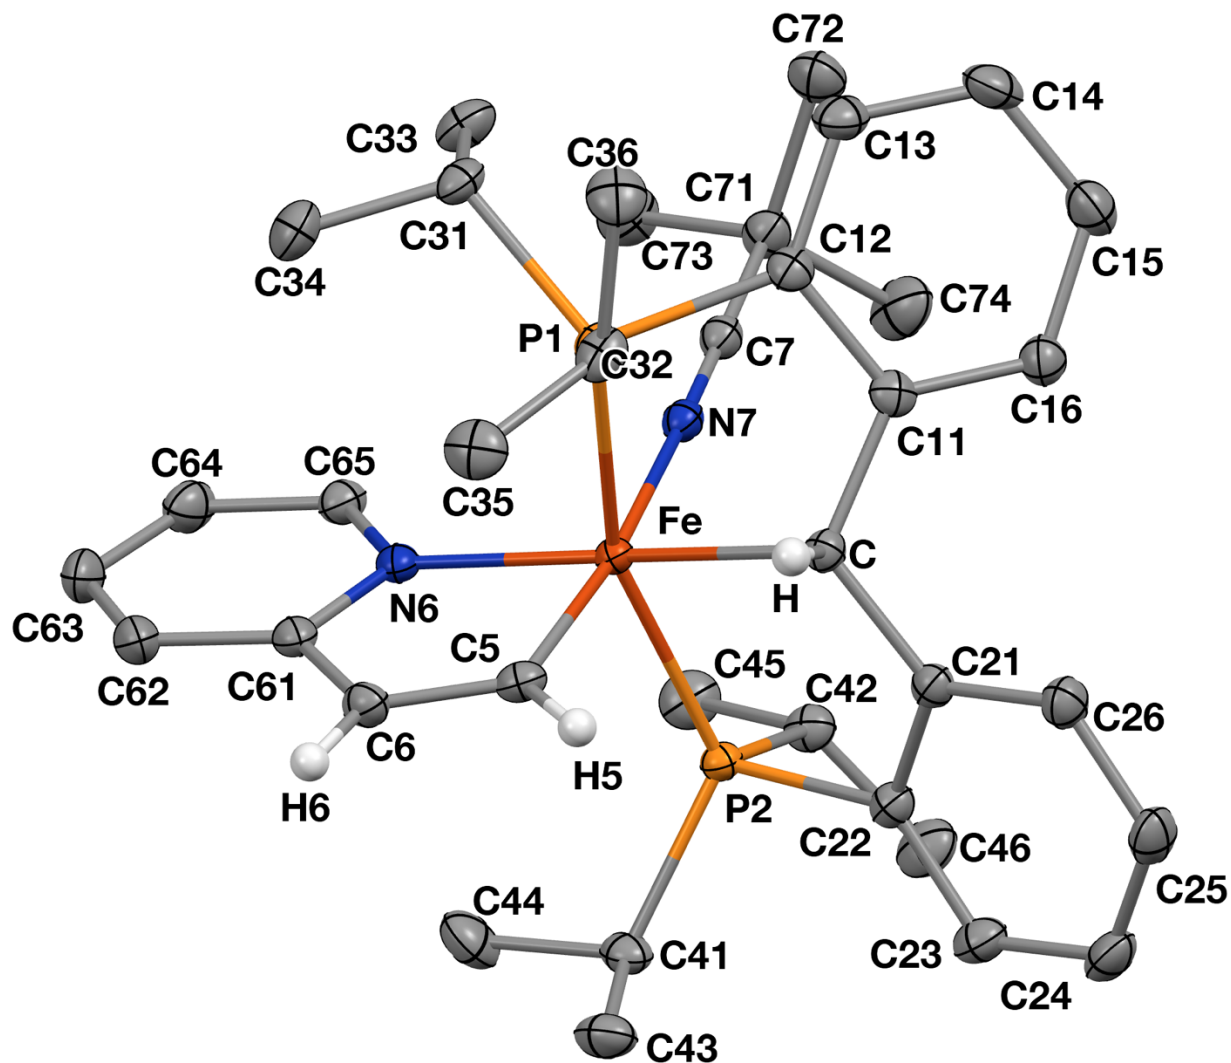

**Figure S15.** Thermal ellipsoid representation of [ $\{PC(sp^3)HP\}Fe\{-C(sp^2)H-CH-Py-\}(NC'Bu)\}$  (6-NC'Bu).

**Table S21.** Crystal data and refinement for [ $\{\text{PC}(\text{sp}^3)\text{HP}\}\text{Fe}\{-\text{C}(\text{sp}^2)\text{H}-\text{CH}-\text{Py}-\}(\text{NC}'\text{Bu})$ ] (**6-NC'Bu**).

|                                                     |                                                                 |
|-----------------------------------------------------|-----------------------------------------------------------------|
| Identification code                                 | ZL_V_281_a                                                      |
| Empirical formula                                   | $\text{C}_{37}\text{H}_{52}\text{FeN}_2\text{P}_2$              |
| Formula weight                                      | 642.59                                                          |
| Temperature                                         | 120(2) K                                                        |
| Wavelength                                          | 1.54178 Å                                                       |
| Crystal system                                      | Monoclinic                                                      |
| Space group                                         | $\text{P}2_1/\text{n}$                                          |
| <i>a</i>                                            | 11.2139(8) Å                                                    |
| <i>b</i>                                            | 16.5390(12) Å                                                   |
| <i>c</i>                                            | 18.2256(13) Å                                                   |
| $\alpha$                                            | 90°                                                             |
| $\beta$                                             | 94.244(3)°                                                      |
| $\gamma$                                            | 90°                                                             |
| Volume                                              | 3371.0(4) Å <sup>3</sup>                                        |
| <i>Z</i>                                            | 4                                                               |
| Density (calculated)                                | 1.266 g.cm <sup>-3</sup>                                        |
| Absorption coefficient ( $\mu$ )                    | 4.683 mm <sup>-1</sup>                                          |
| <i>F</i> (000)                                      | 1376                                                            |
| Crystal size                                        | 0.149 × 0.060 × 0.053 mm <sup>3</sup>                           |
| $\theta$ range for data collection                  | 3.613 to 74.465°                                                |
| Index ranges                                        | -14 ≤ <i>h</i> ≤ 13, -20 ≤ <i>k</i> ≤ 20, -22 ≤ <i>l</i> ≤ 22   |
| Reflections collected                               | 79139                                                           |
| Independent reflections                             | 6880 [ <i>R</i> <sub>int</sub> = 0.0613]                        |
| Completeness to $\theta = 67.679^\circ$             | 100.0 %                                                         |
| Absorption correction                               | Semi-empirical from equivalents                                 |
| Max. and min. transmission                          | 0.7538 and 0.640                                                |
| Refinement method                                   | Full-matrix least-squares on <i>F</i> <sup>2</sup>              |
| Data / restraints / parameters                      | 6880 / 0 / 396                                                  |
| Goodness-of-fit on <i>F</i> <sup>2</sup>            | 1.021                                                           |
| Final <i>R</i> indices [ <i>I</i> > 2σ( <i>I</i> )] | <i>R</i> <sub>1</sub> = 0.0257, <i>wR</i> <sub>2</sub> = 0.0619 |
| <i>R</i> indices (all data)                         | <i>R</i> <sub>1</sub> = 0.0295, <i>wR</i> <sub>2</sub> = 0.0645 |
| Extinction coefficient                              | <i>n/a</i>                                                      |
| Largest diff. peak and hole                         | 0.303 and -0.257 e <sup>-</sup> .Å <sup>-3</sup>                |

**Table S22.** Atomic coordinates and equivalent isotropic displacement parameters ( $\text{\AA}^2$ ) for [ $\{\text{PC}(\text{sp}^3)\text{HP}\}\text{Fe}\{-\text{C}(\text{sp}^2)\text{H}-\text{CH}-\text{Py}-\}(\text{NC}^t\text{Bu})$ ] (**6-NC<sup>t</sup>Bu**).  $U(\text{eq})$  is defined as one third of the trace of the orthogonalized  $U_{ij}$  tensor.

| atom  | x            | y          | z          | $U(\text{eq})$ |
|-------|--------------|------------|------------|----------------|
| P(1)  | 0.07925(3)   | 0.70203(2) | 0.47144(2) | 0.014(1)       |
| C     | 0.28441(11)  | 0.64240(7) | 0.53758(7) | 0.014(1)       |
| C(5)  | 0.30453(11)  | 0.70763(8) | 0.39174(7) | 0.016(1)       |
| N(6)  | 0.24528(9)   | 0.85246(6) | 0.41775(6) | 0.015(1)       |
| C(6)  | 0.28977(12)  | 0.75517(8) | 0.33051(7) | 0.018(1)       |
| N(7)  | 0.22293(9)   | 0.81373(6) | 0.56884(6) | 0.015(1)       |
| C(7)  | 0.19282(11)  | 0.84905(8) | 0.61890(7) | 0.016(1)       |
| C(11) | 0.19197(11)  | 0.64060(7) | 0.59276(7) | 0.015(1)       |
| C(12) | 0.07570(11)  | 0.66465(7) | 0.56580(7) | 0.016(1)       |
| C(13) | -0.01866(12) | 0.66316(8) | 0.61118(8) | 0.022(1)       |
| C(14) | 0.00174(13)  | 0.64070(9) | 0.68517(8) | 0.026(1)       |
| C(15) | 0.11612(14)  | 0.62093(9) | 0.71257(8) | 0.025(1)       |
| C(16) | 0.21111(12)  | 0.62058(8) | 0.66716(7) | 0.019(1)       |
| C(21) | 0.40775(11)  | 0.61334(7) | 0.56311(7) | 0.016(1)       |
| C(22) | 0.50553(11)  | 0.66256(7) | 0.55285(7) | 0.016(1)       |
| C(23) | 0.62230(12)  | 0.63330(8) | 0.56778(8) | 0.021(1)       |
| C(24) | 0.64134(13)  | 0.55525(9) | 0.59426(8) | 0.024(1)       |
| C(25) | 0.54354(13)  | 0.50623(8) | 0.60587(8) | 0.024(1)       |
| C(26) | 0.42833(13)  | 0.53449(8) | 0.59021(7) | 0.021(1)       |
| C(31) | -0.05751(11) | 0.76454(8) | 0.45177(8) | 0.019(1)       |
| C(32) | 0.04140(12)  | 0.60467(8) | 0.42094(7) | 0.020(1)       |
| C(33) | -0.05982(13) | 0.83866(8) | 0.50170(8) | 0.024(1)       |
| C(34) | -0.06664(13) | 0.79182(9) | 0.37117(8) | 0.025(1)       |
| C(35) | 0.06458(13)  | 0.60095(9) | 0.33923(8) | 0.026(1)       |
| C(36) | -0.08537(13) | 0.57472(9) | 0.43262(8) | 0.026(1)       |
| Fe    | 0.26851(2)   | 0.75450(2) | 0.48301(2) | 0.012(1)       |
| C(41) | 0.58334(11)  | 0.79032(8) | 0.45919(7) | 0.019(1)       |
| C(42) | 0.50050(12)  | 0.82499(8) | 0.60520(7) | 0.018(1)       |
| C(43) | 0.60432(13)  | 0.72448(9) | 0.40240(8) | 0.025(1)       |
| C(44) | 0.55748(15)  | 0.87078(9) | 0.41947(9) | 0.030(1)       |
| C(45) | 0.48188(13)  | 0.91602(8) | 0.59264(8) | 0.024(1)       |
| C(46) | 0.62323(13)  | 0.81011(9) | 0.64529(8) | 0.027(1)       |
| C(61) | 0.25441(11)  | 0.83653(8) | 0.34419(7) | 0.017(1)       |

|        |             |             |            |          |
|--------|-------------|-------------|------------|----------|
| C(62)  | 0.23047(12) | 0.89686(9)  | 0.29074(8) | 0.022(1) |
| C(63)  | 0.20262(13) | 0.97427(9)  | 0.31145(8) | 0.026(1) |
| C(64)  | 0.19790(12) | 0.99106(8)  | 0.38624(8) | 0.023(1) |
| C(65)  | 0.21849(11) | 0.92905(8)  | 0.43650(7) | 0.018(1) |
| C(71)  | 0.15681(12) | 0.89730(8)  | 0.68224(7) | 0.019(1) |
| C(72)  | 0.04181(13) | 0.86222(9)  | 0.71032(8) | 0.025(1) |
| C(73)  | 0.13703(15) | 0.98523(9)  | 0.65666(9) | 0.028(1) |
| C(74)  | 0.25774(15) | 0.89323(11) | 0.74364(8) | 0.032(1) |
| P(2)   | 0.46266(3)  | 0.76341(2)  | 0.51998(2) | 0.013(1) |
| H      | 0.2580(15)  | 0.6048(11)  | 0.4982(10) | 0.021    |
| H(5)   | 0.3300(16)  | 0.6507(11)  | 0.3858(10) | 0.025    |
| H(6)   | 0.3020      | 0.7357      | 0.2826     | 0.022    |
| H(13)  | -0.0969     | 0.6774      | 0.5920     | 0.026    |
| H(14)  | -0.0626     | 0.6391      | 0.7162     | 0.031    |
| H(15)  | 0.1304      | 0.6074      | 0.7631     | 0.030    |
| H(16)  | 0.2892      | 0.6067      | 0.6870     | 0.023    |
| H(23)  | 0.6886      | 0.6670      | 0.5597     | 0.026    |
| H(24)  | 0.7204      | 0.5355      | 0.6044     | 0.029    |
| H(25)  | 0.5560      | 0.4531      | 0.6247     | 0.029    |
| H(26)  | 0.3623      | 0.5003      | 0.5978     | 0.025    |
| H(31)  | -0.1289     | 0.7304      | 0.4601     | 0.022    |
| H(32)  | 0.0960      | 0.5632      | 0.4452     | 0.024    |
| H(33A) | -0.1350     | 0.8681      | 0.4911     | 0.036    |
| H(33B) | 0.0076      | 0.8741      | 0.4927     | 0.036    |
| H(33C) | -0.0535     | 0.8213      | 0.5533     | 0.036    |
| H(34A) | -0.1375     | 0.8260      | 0.3617     | 0.038    |
| H(34B) | -0.0732     | 0.7443      | 0.3390     | 0.038    |
| H(34C) | 0.0050      | 0.8226      | 0.3612     | 0.038    |
| H(35A) | 0.0482      | 0.5462      | 0.3206     | 0.038    |
| H(35B) | 0.1482      | 0.6148      | 0.3331     | 0.038    |
| H(35C) | 0.0121      | 0.6395      | 0.3117     | 0.038    |
| H(36A) | -0.0946     | 0.5190      | 0.4148     | 0.039    |
| H(36B) | -0.1439     | 0.6095      | 0.4053     | 0.039    |
| H(36C) | -0.0985     | 0.5766      | 0.4852     | 0.039    |
| H(41)  | 0.6592      | 0.7969      | 0.4911     | 0.023    |
| H(42)  | 0.4409      | 0.8088      | 0.6407     | 0.022    |
| H(43A) | 0.6704      | 0.7406      | 0.3732     | 0.038    |

|        |         |        |        |       |
|--------|---------|--------|--------|-------|
| H(43B) | 0.5316  | 0.7172 | 0.3698 | 0.038 |
| H(43C) | 0.6244  | 0.6735 | 0.4278 | 0.038 |
| H(44A) | 0.6278  | 0.8874 | 0.3944 | 0.044 |
| H(44B) | 0.5390  | 0.9122 | 0.4554 | 0.044 |
| H(44C) | 0.4891  | 0.8642 | 0.3833 | 0.044 |
| H(45A) | 0.4751  | 0.9430 | 0.6400 | 0.037 |
| H(45B) | 0.4085  | 0.9249 | 0.5610 | 0.037 |
| H(45C) | 0.5502  | 0.9383 | 0.5688 | 0.037 |
| H(46A) | 0.6340  | 0.8463 | 0.6879 | 0.040 |
| H(46B) | 0.6858  | 0.8207 | 0.6117 | 0.040 |
| H(46C) | 0.6286  | 0.7538 | 0.6620 | 0.040 |
| H(62)  | 0.2335  | 0.8842 | 0.2401 | 0.027 |
| H(63)  | 0.1870  | 1.0154 | 0.2756 | 0.031 |
| H(64)  | 0.1808  | 1.0442 | 0.4023 | 0.028 |
| H(65)  | 0.2135  | 0.9410 | 0.4872 | 0.022 |
| H(72A) | 0.0207  | 0.8926 | 0.7537 | 0.038 |
| H(72B) | 0.0547  | 0.8053 | 0.7236 | 0.038 |
| H(72C) | -0.0233 | 0.8663 | 0.6716 | 0.038 |
| H(73A) | 0.1120  | 1.0179 | 0.6977 | 0.042 |
| H(73B) | 0.0748  | 0.9868 | 0.6160 | 0.042 |
| H(73C) | 0.2117  | 1.0070 | 0.6400 | 0.042 |
| H(74A) | 0.2357  | 0.9253 | 0.7858 | 0.048 |
| H(74B) | 0.3314  | 0.9150 | 0.7256 | 0.048 |
| H(74C) | 0.2706  | 0.8369 | 0.7588 | 0.048 |

---

**Table S23.** Anisotropic displacement parameters ( $\text{\AA}^2$ ) for [ $\{\text{PC}(\text{sp}^3)\text{HP}\}\text{Fe}\{-\text{C}(\text{sp}^2)\text{H}-\text{CH}-\text{Py}-\}$ ]( $\text{NC}'\text{Bu}$ )] (**6-NC'Bu**). The anisotropic displacement factor exponent takes the form:  $-2\pi^2[h^2a^*2U_{11} + \dots + 2hka^*b^*U_{12}]$

| atom  | $U_{11}$  | $U_{22}$  | $U_{33}$  | $U_{23}$   | $U_{13}$   | $U_{12}$   |
|-------|-----------|-----------|-----------|------------|------------|------------|
| P(1)  | 0.0115(1) | 0.0139(1) | 0.0164(1) | -0.0001(1) | -0.0007(1) | -0.0001(1) |
| C     | 0.0146(6) | 0.0134(5) | 0.0146(5) | 0.0005(4)  | 0.0007(4)  | 0.0002(4)  |
| C(5)  | 0.0122(6) | 0.0179(6) | 0.0192(6) | -0.0025(5) | 0.0010(4)  | 0.0009(4)  |
| N(6)  | 0.0113(5) | 0.0168(5) | 0.0168(5) | 0.0021(4)  | 0.0008(4)  | -0.0004(4) |
| C(6)  | 0.0167(6) | 0.0230(6) | 0.0142(6) | -0.0017(5) | 0.0015(5)  | 0.0013(5)  |
| N(7)  | 0.0123(5) | 0.0147(5) | 0.0165(5) | 0.0012(4)  | -0.0005(4) | -0.0001(4) |
| C(7)  | 0.0144(6) | 0.0164(6) | 0.0175(6) | 0.0013(5)  | -0.0006(5) | 0.0004(4)  |
| C(11) | 0.0167(6) | 0.0112(5) | 0.0186(6) | -0.0007(4) | 0.0020(5)  | -0.0023(4) |
| C(12) | 0.0154(6) | 0.0145(5) | 0.0181(6) | -0.0001(4) | 0.0007(5)  | -0.0025(4) |
| C(13) | 0.0157(6) | 0.0226(6) | 0.0282(7) | 0.0016(5)  | 0.0041(5)  | -0.0013(5) |
| C(14) | 0.0238(7) | 0.0278(7) | 0.0280(7) | 0.0023(6)  | 0.0132(6)  | -0.0014(6) |
| C(15) | 0.0311(8) | 0.0259(7) | 0.0195(6) | 0.0028(5)  | 0.0073(6)  | 0.0008(6)  |
| C(16) | 0.0210(6) | 0.0188(6) | 0.0183(6) | 0.0018(5)  | 0.0013(5)  | 0.0007(5)  |
| C(21) | 0.0166(6) | 0.0171(6) | 0.0135(5) | -0.0011(4) | 0.0008(4)  | 0.0021(5)  |
| C(22) | 0.0157(6) | 0.0168(6) | 0.0162(6) | -0.0014(4) | -0.0001(5) | 0.0017(5)  |
| C(23) | 0.0152(6) | 0.0251(7) | 0.0236(6) | -0.0017(5) | -0.0007(5) | 0.0027(5)  |
| C(24) | 0.0202(7) | 0.0278(7) | 0.0240(7) | -0.0011(5) | -0.0017(5) | 0.0108(5)  |
| C(25) | 0.0293(7) | 0.0200(6) | 0.0227(6) | 0.0025(5)  | 0.0019(5)  | 0.0100(5)  |
| C(26) | 0.0230(7) | 0.0183(6) | 0.0208(6) | 0.0025(5)  | 0.0027(5)  | 0.0027(5)  |
| C(31) | 0.0124(6) | 0.0181(6) | 0.0245(7) | 0.0007(5)  | -0.0020(5) | 0.0010(5)  |
| C(32) | 0.0195(6) | 0.0158(6) | 0.0226(6) | -0.0025(5) | -0.0043(5) | -0.0016(5) |
| C(33) | 0.0186(7) | 0.0236(7) | 0.0299(7) | -0.0036(5) | -0.0013(5) | 0.0058(5)  |
| C(34) | 0.0230(7) | 0.0257(7) | 0.0261(7) | 0.0024(5)  | -0.0054(5) | 0.0042(5)  |
| C(35) | 0.0259(7) | 0.0260(7) | 0.0244(7) | -0.0076(5) | -0.0008(5) | -0.0048(5) |
| C(36) | 0.0245(7) | 0.0236(7) | 0.0286(7) | -0.0010(5) | -0.0023(6) | -0.0084(5) |
| Fe    | 0.0102(1) | 0.0121(1) | 0.0122(1) | 0.0001(1)  | 0.0007(1)  | 0.0006(1)  |
| C(41) | 0.0133(6) | 0.0252(6) | 0.0192(6) | -0.0001(5) | 0.0028(5)  | -0.0029(5) |
| C(42) | 0.0170(6) | 0.0200(6) | 0.0181(6) | -0.0027(5) | 0.0004(5)  | -0.0009(5) |
| C(43) | 0.0185(7) | 0.0339(7) | 0.0238(7) | -0.0041(6) | 0.0066(5)  | 0.0006(6)  |
| C(44) | 0.0345(8) | 0.0273(7) | 0.0284(7) | 0.0061(6)  | 0.0119(6)  | -0.0046(6) |
| C(45) | 0.0247(7) | 0.0196(6) | 0.0288(7) | -0.0043(5) | -0.0003(6) | -0.0025(5) |
| C(46) | 0.0227(7) | 0.0315(7) | 0.0244(7) | -0.0060(6) | -0.0055(6) | 0.0010(6)  |
| C(61) | 0.0123(6) | 0.0220(6) | 0.0167(6) | 0.0023(5)  | 0.0011(4)  | 0.0000(5)  |

|       |           |           |           |            |            |           |
|-------|-----------|-----------|-----------|------------|------------|-----------|
| C(62) | 0.0190(6) | 0.0290(7) | 0.0186(6) | 0.0059(5)  | 0.0026(5)  | 0.0028(5) |
| C(63) | 0.0230(7) | 0.0267(7) | 0.0280(7) | 0.0129(6)  | 0.0035(6)  | 0.0054(5) |
| C(64) | 0.0219(7) | 0.0181(6) | 0.0307(7) | 0.0042(5)  | 0.0037(5)  | 0.0039(5) |
| C(65) | 0.0149(6) | 0.0174(6) | 0.0217(6) | 0.0009(5)  | 0.0014(5)  | 0.0007(5) |
| C(71) | 0.0202(6) | 0.0206(6) | 0.0164(6) | -0.0028(5) | 0.0002(5)  | 0.0036(5) |
| C(72) | 0.0271(7) | 0.0278(7) | 0.0214(6) | -0.0016(5) | 0.0066(5)  | 0.0029(6) |
| C(73) | 0.0337(8) | 0.0189(6) | 0.0322(8) | -0.0031(6) | 0.0050(6)  | 0.0040(6) |
| C(74) | 0.0286(8) | 0.0451(9) | 0.0204(7) | -0.0080(6) | -0.0056(6) | 0.0067(7) |
| P(2)  | 0.0112(1) | 0.0144(1) | 0.0145(1) | 0.0000(1)  | 0.0008(1)  | 0.0000(1) |

---

**Table S24.** Distances [Å] for [ $\{\text{PC}(\text{sp}^3)\text{HP}\}\text{Fe}\{-\text{C}(\text{sp}^2)\text{H}-\text{CH}-\text{Py}-\}(\text{NC}'\text{Bu})$ ] (**6-NC'Bu**).

| atom-atom    | distance   | atom-atom    | distance   |
|--------------|------------|--------------|------------|
| P(1)-C(12)   | 1.8307(13) | P(1)-C(31)   | 1.8622(13) |
| P(1)-C(32)   | 1.8875(13) | P(1)-Fe      | 2.2882(4)  |
| C-C(11)      | 1.4970(17) | C-C(21)      | 1.5050(17) |
| C-Fe         | 2.1054(12) | C-H          | 0.979(18)  |
| C(5)-C(6)    | 1.3651(19) | C(5)-Fe      | 1.9053(13) |
| C(5)-H(5)    | 0.993(18)  | N(6)-C(65)   | 1.3517(17) |
| N(6)-C(61)   | 1.3776(17) | N(6)-Fe      | 2.0152(11) |
| C(6)-C(61)   | 1.4300(18) | C(6)-H(6)    | 0.9500     |
| N(7)-C(7)    | 1.1547(17) | N(7)-Fe      | 1.9459(11) |
| C(7)-C(71)   | 1.4837(17) | C(11)-C(16)  | 1.3968(18) |
| C(11)-C(12)  | 1.4159(18) | C(12)-C(13)  | 1.3907(19) |
| C(13)-C(14)  | 1.401(2)   | C(13)-H(13)  | 0.9500     |
| C(14)-C(15)  | 1.381(2)   | C(14)-H(14)  | 0.9500     |
| C(15)-C(16)  | 1.397(2)   | C(15)-H(15)  | 0.9500     |
| C(16)-H(16)  | 0.9500     | C(21)-C(22)  | 1.3894(18) |
| C(21)-C(26)  | 1.4074(18) | C(22)-C(23)  | 1.4036(18) |
| C(22)-P(2)   | 1.8247(13) | C(23)-C(24)  | 1.389(2)   |
| C(23)-H(23)  | 0.9500     | C(24)-C(25)  | 1.393(2)   |
| C(24)-H(24)  | 0.9500     | C(25)-C(26)  | 1.384(2)   |
| C(25)-H(25)  | 0.9500     | C(26)-H(26)  | 0.9500     |
| C(31)-C(33)  | 1.5281(19) | C(31)-C(34)  | 1.5329(19) |
| C(31)-H(31)  | 1.0000     | C(32)-C(35)  | 1.5318(19) |
| C(32)-C(36)  | 1.5351(19) | C(32)-H(32)  | 1.0000     |
| C(33)-H(33A) | 0.9800     | C(33)-H(33B) | 0.9800     |
| C(33)-H(33C) | 0.9800     | C(34)-H(34A) | 0.9800     |
| C(34)-H(34B) | 0.9800     | C(34)-H(34C) | 0.9800     |
| C(35)-H(35A) | 0.9800     | C(35)-H(35B) | 0.9800     |
| C(35)-H(35C) | 0.9800     | C(36)-H(36A) | 0.9800     |
| C(36)-H(36B) | 0.9800     | C(36)-H(36C) | 0.9800     |
| Fe-P(2)      | 2.2357(4)  | C(41)-C(44)  | 1.532(2)   |
| C(41)-C(43)  | 1.5323(19) | C(41)-P(2)   | 1.8653(13) |
| C(41)-H(41)  | 1.0000     | C(42)-C(46)  | 1.5297(19) |
| C(42)-C(45)  | 1.5348(19) | C(42)-P(2)   | 1.8793(13) |
| C(42)-H(42)  | 1.0000     | C(43)-H(43A) | 0.9800     |
| C(43)-H(43B) | 0.9800     | C(43)-H(43C) | 0.9800     |
| C(44)-H(44A) | 0.9800     | C(44)-H(44B) | 0.9800     |
| C(44)-H(44C) | 0.9800     | C(45)-H(45A) | 0.9800     |
| C(45)-H(45B) | 0.9800     | C(45)-H(45C) | 0.9800     |
| C(46)-H(46A) | 0.9800     | C(46)-H(46B) | 0.9800     |
| C(46)-H(46C) | 0.9800     | C(61)-C(62)  | 1.4064(19) |
| C(62)-C(63)  | 1.377(2)   | C(62)-H(62)  | 0.9500     |
| C(63)-C(64)  | 1.396(2)   | C(63)-H(63)  | 0.9500     |
| C(64)-C(65)  | 1.3831(19) | C(64)-H(64)  | 0.9500     |
| C(65)-H(65)  | 0.9500     | C(71)-C(74)  | 1.5332(19) |
| C(71)-C(72)  | 1.536(2)   | C(71)-C(73)  | 1.5381(19) |



|              |        |              |        |
|--------------|--------|--------------|--------|
| C(72)-H(72A) | 0.9800 | C(72)-H(72B) | 0.9800 |
| C(72)-H(72C) | 0.9800 | C(73)-H(73A) | 0.9800 |
| C(73)-H(73B) | 0.9800 | C(73)-H(73C) | 0.9800 |
| C(74)-H(74A) | 0.9800 | C(74)-H(74B) | 0.9800 |
| C(74)-H(74C) | 0.9800 |              |        |

---

**Table S25.** Angles [°] for [ $\{\text{PC}(\text{sp}^3)\text{HP}\}\text{Fe}\{-\text{C}(\text{sp}^2)\text{H}-\text{CH}-\text{Py}-\}(\text{NC}'\text{Bu})$ ] (**6-NC'Bu**).

| atom-atom-atom      | angle      | atom-atom-atom      | angle      |
|---------------------|------------|---------------------|------------|
| C(12)-P(1)-C(31)    | 107.07(6)  | C(12)-P(1)-C(32)    | 98.64(6)   |
| C(31)-P(1)-C(32)    | 103.15(6)  | C(12)-P(1)-Fe       | 97.24(4)   |
| C(31)-P(1)-Fe       | 123.52(4)  | C(32)-P(1)-Fe       | 122.82(4)  |
| C(11)-C-C(21)       | 116.89(10) | C(11)-C-Fe          | 107.23(8)  |
| C(21)-C-Fe          | 118.10(8)  | C(11)-C-H           | 107.0(10)  |
| C(21)-C-H           | 104.2(10)  | Fe-C-H              | 101.7(10)  |
| C(6)-C(5)-Fe        | 117.30(9)  | C(6)-C(5)-H(5)      | 118.4(10)  |
| Fe-C(5)-H(5)        | 124.2(10)  | C(65)-N(6)-C(61)    | 117.33(11) |
| C(65)-N(6)-Fe       | 128.73(9)  | C(61)-N(6)-Fe       | 113.89(8)  |
| C(5)-C(6)-C(61)     | 114.70(12) | C(5)-C(6)-H(6)      | 122.6      |
| C(61)-C(6)-H(6)     | 122.6      | C(7)-N(7)-Fe        | 178.17(10) |
| N(7)-C(7)-C(71)     | 177.69(14) | C(16)-C(11)-C(12)   | 118.35(12) |
| C(16)-C(11)-C       | 126.33(12) | C(12)-C(11)-C       | 115.27(11) |
| C(13)-C(12)-C(11)   | 120.68(12) | C(13)-C(12)-P(1)    | 129.43(10) |
| C(11)-C(12)-P(1)    | 109.72(9)  | C(12)-C(13)-C(14)   | 119.99(13) |
| C(12)-C(13)-H(13)   | 120.0      | C(14)-C(13)-H(13)   | 120.0      |
| C(15)-C(14)-C(13)   | 119.47(13) | C(15)-C(14)-H(14)   | 120.3      |
| C(13)-C(14)-H(14)   | 120.3      | C(14)-C(15)-C(16)   | 121.03(13) |
| C(14)-C(15)-H(15)   | 119.5      | C(16)-C(15)-H(15)   | 119.5      |
| C(15)-C(16)-C(11)   | 120.34(13) | C(15)-C(16)-H(16)   | 119.8      |
| C(11)-C(16)-H(16)   | 119.8      | C(22)-C(21)-C(26)   | 118.66(12) |
| C(22)-C(21)-C       | 119.18(11) | C(26)-C(21)-C       | 121.83(12) |
| C(21)-C(22)-C(23)   | 120.40(12) | C(21)-C(22)-P(2)    | 112.86(9)  |
| C(23)-C(22)-P(2)    | 126.74(10) | C(24)-C(23)-C(22)   | 120.33(13) |
| C(24)-C(23)-H(23)   | 119.8      | C(22)-C(23)-H(23)   | 119.8      |
| C(23)-C(24)-C(25)   | 119.43(13) | C(23)-C(24)-H(24)   | 120.3      |
| C(25)-C(24)-H(24)   | 120.3      | C(26)-C(25)-C(24)   | 120.38(13) |
| C(26)-C(25)-H(25)   | 119.8      | C(24)-C(25)-H(25)   | 119.8      |
| C(25)-C(26)-C(21)   | 120.78(13) | C(25)-C(26)-H(26)   | 119.6      |
| C(21)-C(26)-H(26)   | 119.6      | C(33)-C(31)-C(34)   | 109.37(11) |
| C(33)-C(31)-P(1)    | 112.38(9)  | C(34)-C(31)-P(1)    | 110.09(9)  |
| C(33)-C(31)-H(31)   | 108.3      | C(34)-C(31)-H(31)   | 108.3      |
| P(1)-C(31)-H(31)    | 108.3      | C(35)-C(32)-C(36)   | 110.33(11) |
| C(35)-C(32)-P(1)    | 117.39(9)  | C(36)-C(32)-P(1)    | 112.63(10) |
| C(35)-C(32)-H(32)   | 105.1      | C(36)-C(32)-H(32)   | 105.1      |
| P(1)-C(32)-H(32)    | 105.1      | C(31)-C(33)-H(33A)  | 109.5      |
| C(31)-C(33)-H(33B)  | 109.5      | H(33A)-C(33)-H(33B) | 109.5      |
| C(31)-C(33)-H(33C)  | 109.5      | H(33A)-C(33)-H(33C) | 109.5      |
| H(33B)-C(33)-H(33C) | 109.5      | C(31)-C(34)-H(34A)  | 109.5      |
| C(31)-C(34)-H(34B)  | 109.5      | H(34A)-C(34)-H(34B) | 109.5      |
| C(31)-C(34)-H(34C)  | 109.5      | H(34A)-C(34)-H(34C) | 109.5      |
| H(34B)-C(34)-H(34C) | 109.5      | C(32)-C(35)-H(35A)  | 109.5      |
| C(32)-C(35)-H(35B)  | 109.5      | H(35A)-C(35)-H(35B) | 109.5      |
| C(32)-C(35)-H(35C)  | 109.5      | H(35A)-C(35)-H(35C) | 109.5      |
| H(35B)-C(35)-H(35C) | 109.5      | C(32)-C(36)-H(36A)  | 109.5      |

|                     |            |                     |             |
|---------------------|------------|---------------------|-------------|
| C(32)-C(36)-H(36B)  | 109.5      | H(36A)-C(36)-H(36B) | 109.5       |
| C(32)-C(36)-H(36C)  | 109.5      | H(36A)-C(36)-H(36C) | 109.5       |
| H(36B)-C(36)-H(36C) | 109.5      | C(5)-Fe-N(7)        | 172.72(5)   |
| C(5)-Fe-N(6)        | 80.70(5)   | N(7)-Fe-N(6)        | 92.27(4)    |
| C(5)-Fe-C           | 92.18(5)   | N(7)-Fe-C           | 94.68(5)    |
| N(6)-Fe-C           | 171.70(5)  | C(5)-Fe-P(2)        | 91.45(4)    |
| N(7)-Fe-P(2)        | 91.86(3)   | N(6)-Fe-P(2)        | 101.85(3)   |
| C-Fe-P(2)           | 82.48(4)   | C(5)-Fe-P(1)        | 91.17(4)    |
| N(7)-Fe-P(1)        | 88.16(3)   | N(6)-Fe-P(1)        | 99.90(3)    |
| C-Fe-P(1)           | 75.82(4)   | P(2)-Fe-P(1)        | 158.227(14) |
| C(44)-C(41)-C(43)   | 109.34(12) | C(44)-C(41)-P(2)    | 111.57(9)   |
| C(43)-C(41)-P(2)    | 112.71(9)  | C(44)-C(41)-H(41)   | 107.7       |
| C(43)-C(41)-H(41)   | 107.7      | P(2)-C(41)-H(41)    | 107.7       |
| C(46)-C(42)-C(45)   | 109.68(11) | C(46)-C(42)-P(2)    | 116.60(9)   |
| C(45)-C(42)-P(2)    | 112.86(9)  | C(46)-C(42)-H(42)   | 105.6       |
| C(45)-C(42)-H(42)   | 105.6      | P(2)-C(42)-H(42)    | 105.6       |
| C(41)-C(43)-H(43A)  | 109.5      | C(41)-C(43)-H(43B)  | 109.5       |
| H(43A)-C(43)-H(43B) | 109.5      | C(41)-C(43)-H(43C)  | 109.5       |
| H(43A)-C(43)-H(43C) | 109.5      | H(43B)-C(43)-H(43C) | 109.5       |
| C(41)-C(44)-H(44A)  | 109.5      | C(41)-C(44)-H(44B)  | 109.5       |
| H(44A)-C(44)-H(44B) | 109.5      | C(41)-C(44)-H(44C)  | 109.5       |
| H(44A)-C(44)-H(44C) | 109.5      | H(44B)-C(44)-H(44C) | 109.5       |
| C(42)-C(45)-H(45A)  | 109.5      | C(42)-C(45)-H(45B)  | 109.5       |
| H(45A)-C(45)-H(45B) | 109.5      | C(42)-C(45)-H(45C)  | 109.5       |
| H(45A)-C(45)-H(45C) | 109.5      | H(45B)-C(45)-H(45C) | 109.5       |
| C(42)-C(46)-H(46A)  | 109.5      | C(42)-C(46)-H(46B)  | 109.5       |
| H(46A)-C(46)-H(46B) | 109.5      | C(42)-C(46)-H(46C)  | 109.5       |
| H(46A)-C(46)-H(46C) | 109.5      | H(46B)-C(46)-H(46C) | 109.5       |
| N(6)-C(61)-C(62)    | 120.96(12) | N(6)-C(61)-C(6)     | 113.02(11)  |
| C(62)-C(61)-C(6)    | 126.02(12) | C(63)-C(62)-C(61)   | 120.34(13)  |
| C(63)-C(62)-H(62)   | 119.8      | C(61)-C(62)-H(62)   | 119.8       |
| C(62)-C(63)-C(64)   | 118.58(12) | C(62)-C(63)-H(63)   | 120.7       |
| C(64)-C(63)-H(63)   | 120.7      | C(65)-C(64)-C(63)   | 118.86(13)  |
| C(65)-C(64)-H(64)   | 120.6      | C(63)-C(64)-H(64)   | 120.6       |
| N(6)-C(65)-C(64)    | 123.84(13) | N(6)-C(65)-H(65)    | 118.1       |
| C(64)-C(65)-H(65)   | 118.1      | C(7)-C(71)-C(74)    | 108.40(11)  |
| C(7)-C(71)-C(72)    | 109.85(11) | C(74)-C(71)-C(72)   | 109.44(12)  |
| C(7)-C(71)-C(73)    | 108.31(11) | C(74)-C(71)-C(73)   | 110.17(12)  |
| C(72)-C(71)-C(73)   | 110.63(11) | C(71)-C(72)-H(72A)  | 109.5       |
| C(71)-C(72)-H(72B)  | 109.5      | H(72A)-C(72)-H(72B) | 109.5       |
| C(71)-C(72)-H(72C)  | 109.5      | H(72A)-C(72)-H(72C) | 109.5       |
| H(72B)-C(72)-H(72C) | 109.5      | C(71)-C(73)-H(73A)  | 109.5       |
| C(71)-C(73)-H(73B)  | 109.5      | H(73A)-C(73)-H(73B) | 109.5       |
| C(71)-C(73)-H(73C)  | 109.5      | H(73A)-C(73)-H(73C) | 109.5       |
| H(73B)-C(73)-H(73C) | 109.5      | C(71)-C(74)-H(74A)  | 109.5       |
| C(71)-C(74)-H(74B)  | 109.5      | H(74A)-C(74)-H(74B) | 109.5       |
| C(71)-C(74)-H(74C)  | 109.5      | H(74A)-C(74)-H(74C) | 109.5       |
| H(74B)-C(74)-H(74C) | 109.5      | C(22)-P(2)-C(41)    | 103.18(6)   |

|                  |           |                  |           |
|------------------|-----------|------------------|-----------|
| C(22)-P(2)-C(42) | 100.73(6) | C(41)-P(2)-C(42) | 103.43(6) |
| C(22)-P(2)-Fe    | 105.41(4) | C(41)-P(2)-Fe    | 124.74(4) |
| C(42)-P(2)-Fe    | 116.11(4) |                  |           |

---

3.6 Crystal data for [ $\{PC(sp^3)HP\}Fe\{-C(sp^3)H_2-N^{quin-}\}$ ] (7)

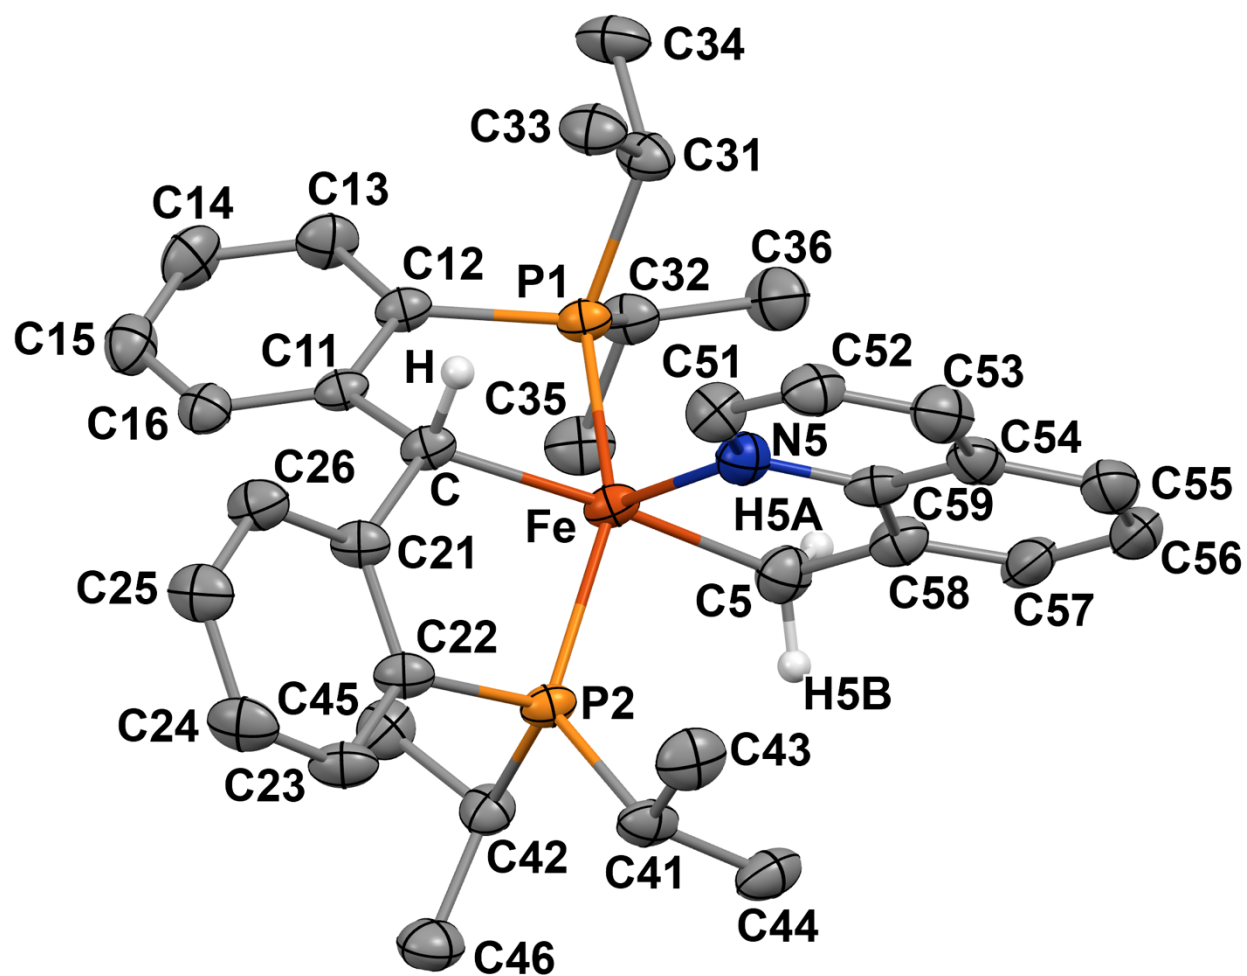

Figure S16. Thermal ellipsoid representation of [ $\{PC(sp^3)HP\}Fe\{-C(sp^3)H_2-N^{quin-}\}$ ] (7).

**Table S26.** Crystal data and structural refinement for  $\{\text{PC}(\text{sp}^3)\text{HP}\}\text{Fe}\{-\text{C}(\text{sp}^3)\text{H}_2\text{-N}^{\text{quin}}-\}$  (7).

|                                             |                                                               |
|---------------------------------------------|---------------------------------------------------------------|
| Identification code                         | ZL_VI_145                                                     |
| Empirical formula                           | $\text{C}_{35}\text{H}_{45}\text{FeNP}_2$                     |
| Formula weight                              | 597.51                                                        |
| Temperature                                 | 229(2) K                                                      |
| Wavelength                                  | 0.71073 Å                                                     |
| Crystal system                              | Monoclinic                                                    |
| Space group                                 | $P2_1/n$                                                      |
| <i>a</i>                                    | 9.9076(17) Å                                                  |
| <i>b</i>                                    | 9.9398(19) Å                                                  |
| <i>c</i>                                    | 31.847(6) Å                                                   |
| $\alpha$                                    | 90°                                                           |
| $\beta$                                     | 96.767(6)°                                                    |
| $\gamma$                                    | 90°                                                           |
| Volume                                      | 3114.4(10) Å <sup>3</sup>                                     |
| <i>Z</i>                                    | 4                                                             |
| Density (calculated)                        | 1.274 g.cm <sup>-3</sup>                                      |
| Absorption coefficient ( $\mu$ )            | 0.611 mm <sup>-1</sup>                                        |
| F(000)                                      | 1272                                                          |
| Crystal size                                | 0.153 × 0.126 × 0.090 mm <sup>3</sup>                         |
| $\theta$ range for data collection          | 2.094 to 28.305°                                              |
| Index ranges                                | -13 ≤ <i>h</i> ≤ 11, -13 ≤ <i>k</i> ≤ 13, -42 ≤ <i>l</i> ≤ 42 |
| Reflections collected                       | 95297                                                         |
| Independent reflections                     | 7755 [ $R_{\text{int}} = 0.1011$ ]                            |
| Completeness to $\theta = 25.000^\circ$     | 100.0 %                                                       |
| Absorption correction                       | Semi-empirical from equivalents                               |
| Max. and min. transmission                  | 0.7457 and 0.7079                                             |
| Refinement method                           | Full-matrix least-squares on $F^2$                            |
| Data / restraints / parameters              | 7755 / 0 / 369                                                |
| Goodness-of-fit on $F^2$                    | 1.039                                                         |
| Final <i>R</i> indices [ $I > 2\sigma(I)$ ] | $R_1 = 0.0539$ , $wR_2 = 0.1272$                              |
| <i>R</i> indices (all data)                 | $R_1 = 0.0724$ , $wR_2 = 0.1386$                              |
| Extinction coefficient                      | n/a                                                           |
| Largest diff. peak and hole                 | 1.516 and -0.815 e <sup>-</sup> .Å <sup>-3</sup>              |

**Table S27.** Atomic coordinates and equivalent isotropic displacement parameters ( $\text{\AA}^2$ ) for [ $\{\text{PC}(\text{sp}^3)\text{HP}\}\text{Fe}\{-\text{C}(\text{sp}^3)\text{H}_2\text{-N}^{\text{quin}}-\}$ ] (7).  $U(\text{eq})$  is defined as one third of the trace of the orthogonalized  $U_{ij}$  tensor.

| atom  | x          | y          | z           | $U(\text{eq})$ |
|-------|------------|------------|-------------|----------------|
| Fe    | 0.28863(4) | 0.33581(4) | 0.11963(2)  | 0.024(1)       |
| P(1)  | 0.14782(7) | 0.18032(7) | 0.08619(2)  | 0.024(1)       |
| C     | 0.4156(3)  | 0.1688(3)  | 0.13063(8)  | 0.024(1)       |
| P(2)  | 0.48445(7) | 0.44913(7) | 0.12928(2)  | 0.025(1)       |
| C(5)  | 0.1712(3)  | 0.5048(3)  | 0.10284(10) | 0.035(1)       |
| C(11) | 0.4029(3)  | 0.0753(2)  | 0.09337(8)  | 0.024(1)       |
| C(12) | 0.2716(3)  | 0.0576(3)  | 0.07153(8)  | 0.025(1)       |
| C(13) | 0.2494(3)  | -0.0381(3) | 0.03918(9)  | 0.033(1)       |
| C(14) | 0.3569(3)  | -0.1108(3) | 0.02655(9)  | 0.039(1)       |
| C(15) | 0.4874(3)  | -0.0859(3) | 0.04561(9)  | 0.035(1)       |
| C(16) | 0.5093(3)  | 0.0048(3)  | 0.07855(8)  | 0.029(1)       |
| C(21) | 0.5600(3)  | 0.1957(3)  | 0.15065(8)  | 0.027(1)       |
| C(22) | 0.6108(3)  | 0.3267(3)  | 0.15121(8)  | 0.027(1)       |
| C(23) | 0.7433(3)  | 0.3534(3)  | 0.17017(9)  | 0.034(1)       |
| C(24) | 0.8230(3)  | 0.2520(3)  | 0.18938(9)  | 0.038(1)       |
| C(25) | 0.7722(3)  | 0.1218(3)  | 0.18973(9)  | 0.036(1)       |
| C(26) | 0.6430(3)  | 0.0945(3)  | 0.17042(9)  | 0.033(1)       |
| C(31) | 0.0244(3)  | 0.0851(3)  | 0.11445(9)  | 0.031(1)       |
| C(32) | 0.0467(3)  | 0.2192(3)  | 0.03482(8)  | 0.030(1)       |
| C(33) | 0.0997(3)  | 0.0212(3)  | 0.15434(9)  | 0.036(1)       |
| C(34) | -0.0585(3) | -0.0212(3) | 0.08799(11) | 0.042(1)       |
| C(35) | 0.1335(3)  | 0.2935(3)  | 0.00572(9)  | 0.036(1)       |
| C(36) | -0.0822(3) | 0.2986(3)  | 0.04066(11) | 0.043(1)       |
| C(41) | 0.5226(3)  | 0.5976(3)  | 0.16375(9)  | 0.032(1)       |
| C(42) | 0.5390(3)  | 0.5024(3)  | 0.07793(8)  | 0.030(1)       |
| C(43) | 0.5019(4)  | 0.5653(3)  | 0.20965(9)  | 0.040(1)       |
| C(44) | 0.4369(4)  | 0.7195(3)  | 0.14802(10) | 0.039(1)       |
| C(45) | 0.5336(3)  | 0.3802(3)  | 0.04866(9)  | 0.034(1)       |
| C(46) | 0.6778(3)  | 0.5708(3)  | 0.08056(10) | 0.041(1)       |
| C(51) | 0.2604(3)  | 0.3087(3)  | 0.21536(9)  | 0.035(1)       |
| C(52) | 0.2124(3)  | 0.3459(3)  | 0.25300(9)  | 0.035(1)       |
| C(53) | 0.1232(3)  | 0.4481(3)  | 0.25401(10) | 0.040(1)       |
| C(54) | 0.0795(3)  | 0.5155(3)  | 0.21673(9)  | 0.034(1)       |

|        |            |           |             |          |
|--------|------------|-----------|-------------|----------|
| C(55)  | -0.0176(3) | 0.6232(3) | 0.21394(11) | 0.042(1) |
| C(56)  | -0.0549(3) | 0.6845(3) | 0.17676(12) | 0.042(1) |
| C(57)  | 0.0054(3)  | 0.6466(3) | 0.13878(11) | 0.038(1) |
| C(58)  | 0.1001(3)  | 0.5455(3) | 0.13984(9)  | 0.033(1) |
| C(59)  | 0.1316(3)  | 0.4787(3) | 0.17900(8)  | 0.029(1) |
| N(5)   | 0.2225(2)  | 0.3708(2) | 0.17859(7)  | 0.031(1) |
| H      | 0.369(3)   | 0.124(3)  | 0.1523(10)  | 0.036    |
| H(5A)  | 0.099(4)   | 0.510(4)  | 0.0814(12)  | 0.053    |
| H(5B)  | 0.213(4)   | 0.585(4)  | 0.0953(12)  | 0.053    |
| H(13)  | 0.1608     | -0.0531   | 0.0259      | 0.040    |
| H(14)  | 0.3414     | -0.1764   | 0.0053      | 0.046    |
| H(15)  | 0.5615     | -0.1310   | 0.0361      | 0.042    |
| H(16)  | 0.5985     | 0.0195    | 0.0913      | 0.034    |
| H(23)  | 0.7780     | 0.4414    | 0.1697      | 0.041    |
| H(24)  | 0.9114     | 0.2709    | 0.2022      | 0.045    |
| H(25)  | 0.8258     | 0.0524    | 0.2031      | 0.044    |
| H(26)  | 0.6098     | 0.0059    | 0.1705      | 0.040    |
| H(31)  | -0.0407    | 0.1512    | 0.1238      | 0.037    |
| H(32)  | 0.0183     | 0.1327    | 0.0211      | 0.036    |
| H(33A) | 0.1659     | -0.0431   | 0.1463      | 0.054    |
| H(33B) | 0.0351     | -0.0246   | 0.1700      | 0.054    |
| H(33C) | 0.1459     | 0.0907    | 0.1719      | 0.054    |
| H(34A) | -0.1097    | 0.0215    | 0.0637      | 0.063    |
| H(34B) | -0.1208    | -0.0645   | 0.1051      | 0.063    |
| H(34C) | 0.0023     | -0.0880   | 0.0784      | 0.063    |
| H(35A) | 0.2103     | 0.2376    | 0.0007      | 0.055    |
| H(35B) | 0.1663     | 0.3770    | 0.0190      | 0.055    |
| H(35C) | 0.0792     | 0.3129    | -0.0209     | 0.055    |
| H(36A) | -0.1311    | 0.3190    | 0.0132      | 0.064    |
| H(36B) | -0.0576    | 0.3818    | 0.0556      | 0.064    |
| H(36C) | -0.1396    | 0.2453    | 0.0569      | 0.064    |
| H(41)  | 0.6194     | 0.6211    | 0.1631      | 0.038    |
| H(42)  | 0.4708     | 0.5678    | 0.0651      | 0.036    |
| H(43A) | 0.4063     | 0.5487    | 0.2115      | 0.060    |
| H(43B) | 0.5322     | 0.6409    | 0.2276      | 0.060    |
| H(43C) | 0.5542     | 0.4860    | 0.2189      | 0.060    |
| H(44A) | 0.4507     | 0.7388    | 0.1190      | 0.059    |



|        |         |        |        |       |
|--------|---------|--------|--------|-------|
| H(44B) | 0.4641  | 0.7969 | 0.1656 | 0.059 |
| H(44C) | 0.3416  | 0.7003 | 0.1495 | 0.059 |
| H(45A) | 0.5596  | 0.4070 | 0.0214 | 0.052 |
| H(45B) | 0.4420  | 0.3442 | 0.0449 | 0.052 |
| H(45C) | 0.5959  | 0.3119 | 0.0611 | 0.052 |
| H(46A) | 0.6989  | 0.5911 | 0.0523 | 0.062 |
| H(46B) | 0.7466  | 0.5113 | 0.0945 | 0.062 |
| H(46C) | 0.6759  | 0.6536 | 0.0966 | 0.062 |
| H(51)  | 0.3221  | 0.2368 | 0.2158 | 0.042 |
| H(52)  | 0.2424  | 0.2993 | 0.2780 | 0.042 |
| H(53)  | 0.0913  | 0.4733 | 0.2795 | 0.048 |
| H(55)  | -0.0553 | 0.6511 | 0.2382 | 0.050 |
| H(56)  | -0.1209 | 0.7528 | 0.1752 | 0.050 |
| H(57)  | -0.0211 | 0.6920 | 0.1132 | 0.046 |

---

**Table S28.** Anisotropic displacement parameters ( $\text{\AA}^2$ ) for [ $\{\text{PC}(\text{sp}^3)\text{HP}\}\text{Fe}\{-\text{C}(\text{sp}^3)\text{H}_2\text{-N}^{\text{quin}}-\}$ ] (7). The anisotropic displacement factor exponent takes the form:  $-2\pi^2[h^2a^*U_{11} + \dots + 2hka^*b^*U_{12}]$

| atom  | $U_{11}$   | $U_{22}$   | $U_{33}$   | $U_{23}$    | $U_{13}$    | $U_{12}$    |
|-------|------------|------------|------------|-------------|-------------|-------------|
| Fe    | 0.0296(2)  | 0.0213(2)  | 0.0206(2)  | 0.0007(1)   | -0.0033(1)  | -0.0038(2)  |
| P(1)  | 0.0263(3)  | 0.0234(3)  | 0.0208(3)  | 0.0008(2)   | -0.0023(2)  | -0.0045(3)  |
| C     | 0.0275(13) | 0.0229(12) | 0.0209(11) | 0.0006(10)  | -0.0036(9)  | -0.0036(10) |
| P(2)  | 0.0311(4)  | 0.0220(3)  | 0.0199(3)  | -0.0012(2)  | 0.0003(2)   | -0.0056(3)  |
| C(5)  | 0.0395(17) | 0.0337(15) | 0.0324(15) | -0.0064(12) | 0.0048(12)  | -0.0023(13) |
| C(11) | 0.0294(13) | 0.0202(11) | 0.0206(11) | 0.0034(9)   | 0.0001(10)  | -0.0037(10) |
| C(12) | 0.0303(14) | 0.0238(12) | 0.0215(12) | 0.0006(10)  | -0.0008(10) | -0.0046(10) |
| C(13) | 0.0362(15) | 0.0355(15) | 0.0265(13) | -0.0076(11) | -0.0028(11) | -0.0067(12) |
| C(14) | 0.0532(19) | 0.0347(16) | 0.0277(14) | -0.0103(12) | 0.0037(13)  | 0.0003(14)  |
| C(15) | 0.0414(16) | 0.0340(15) | 0.0299(14) | 0.0008(12)  | 0.0091(12)  | 0.0050(13)  |
| C(16) | 0.0299(14) | 0.0284(13) | 0.0276(13) | 0.0043(11)  | 0.0021(10)  | 0.0004(11)  |
| C(21) | 0.0286(13) | 0.0290(13) | 0.0213(12) | 0.0013(10)  | -0.0029(10) | -0.0058(11) |
| C(22) | 0.0298(13) | 0.0288(13) | 0.0214(12) | 0.0009(10)  | -0.0026(10) | -0.0072(11) |
| C(23) | 0.0364(16) | 0.0336(15) | 0.0305(14) | 0.0023(12)  | -0.0037(12) | -0.0132(12) |
| C(24) | 0.0305(15) | 0.0460(18) | 0.0334(15) | 0.0042(13)  | -0.0098(12) | -0.0097(13) |
| C(25) | 0.0333(15) | 0.0399(16) | 0.0340(15) | 0.0090(13)  | -0.0065(12) | -0.0023(13) |
| C(26) | 0.0329(15) | 0.0300(14) | 0.0339(15) | 0.0034(12)  | -0.0059(11) | -0.0034(12) |
| C(31) | 0.0295(14) | 0.0330(14) | 0.0313(14) | 0.0069(12)  | 0.0040(11)  | -0.0021(11) |
| C(32) | 0.0307(14) | 0.0314(14) | 0.0264(13) | 0.0028(11)  | -0.0061(10) | -0.0047(11) |
| C(33) | 0.0393(16) | 0.0365(16) | 0.0323(15) | 0.0100(12)  | 0.0027(12)  | -0.0066(13) |
| C(34) | 0.0358(17) | 0.0414(17) | 0.0470(18) | 0.0081(14)  | -0.0035(13) | -0.0150(14) |
| C(35) | 0.0450(17) | 0.0411(16) | 0.0215(13) | 0.0052(12)  | -0.0027(12) | -0.0060(14) |
| C(36) | 0.0353(16) | 0.0414(17) | 0.0494(19) | 0.0082(15)  | -0.0062(14) | 0.0027(14)  |
| C(41) | 0.0373(15) | 0.0294(14) | 0.0288(14) | -0.0075(11) | 0.0040(11)  | -0.0112(12) |
| C(42) | 0.0365(15) | 0.0280(13) | 0.0249(13) | 0.0037(11)  | 0.0057(11)  | 0.0002(11)  |
| C(43) | 0.0536(19) | 0.0419(17) | 0.0228(13) | -0.0075(12) | 0.0004(12)  | -0.0077(15) |
| C(44) | 0.059(2)   | 0.0256(14) | 0.0340(15) | -0.0044(12) | 0.0103(14)  | -0.0079(14) |
| C(45) | 0.0445(17) | 0.0354(15) | 0.0239(13) | 0.0004(12)  | 0.0057(12)  | 0.0008(13)  |
| C(46) | 0.0470(18) | 0.0383(17) | 0.0407(17) | 0.0021(14)  | 0.0139(14)  | -0.0103(14) |
| C(51) | 0.0388(16) | 0.0357(15) | 0.0295(14) | 0.0008(12)  | 0.0018(12)  | 0.0004(13)  |
| C(52) | 0.0454(17) | 0.0339(15) | 0.0261(13) | 0.0004(11)  | 0.0081(12)  | -0.0073(13) |
| C(53) | 0.0445(18) | 0.0420(17) | 0.0360(16) | -0.0078(13) | 0.0114(13)  | -0.0084(14) |
| C(54) | 0.0309(15) | 0.0363(15) | 0.0342(15) | -0.0099(12) | 0.0070(11)  | -0.0099(12) |
| C(55) | 0.0368(17) | 0.0377(17) | 0.0518(19) | -0.0117(15) | 0.0115(14)  | -0.0070(13) |

|       |            |            |            |             |             |             |
|-------|------------|------------|------------|-------------|-------------|-------------|
| C(56) | 0.0334(16) | 0.0254(14) | 0.066(2)   | -0.0026(14) | 0.0054(15)  | 0.0001(12)  |
| C(57) | 0.0352(16) | 0.0207(13) | 0.057(2)   | -0.0008(13) | -0.0028(14) | 0.0001(11)  |
| C(58) | 0.0357(15) | 0.0280(14) | 0.0333(15) | -0.0011(11) | 0.0003(12)  | -0.0043(12) |
| C(59) | 0.0313(14) | 0.0257(13) | 0.0281(13) | 0.0014(11)  | -0.0035(10) | -0.0108(11) |
| N(5)  | 0.0345(13) | 0.0304(12) | 0.0278(12) | -0.0040(9)  | 0.0046(9)   | -0.0029(10) |

---

**Table S29.** Distances [Å] for [ $\{\text{PC}(\text{sp}^3)\text{HP}\}\text{Fe}\{-\text{C}(\text{sp}^3)\text{H}_2\text{-N}^{\text{quin}}-\}$ ] (7).

| atom-atom    | distance  | atom-atom    | distance  |
|--------------|-----------|--------------|-----------|
| Fe-C(5)      | 2.078(3)  | Fe-C         | 2.087(3)  |
| Fe-N(5)      | 2.090(2)  | Fe-P(2)      | 2.2331(8) |
| Fe-P(1)      | 2.2625(8) | P(1)-C(12)   | 1.829(3)  |
| P(1)-C(32)   | 1.856(3)  | P(1)-C(31)   | 1.860(3)  |
| C-C(11)      | 1.501(3)  | C-C(21)      | 1.519(3)  |
| C-H          | 0.98(3)   | P(2)-C(22)   | 1.825(3)  |
| P(2)-C(41)   | 1.851(3)  | P(2)-C(42)   | 1.859(3)  |
| C(5)-C(58)   | 1.498(4)  | C(5)-H(5A)   | 0.93(4)   |
| C(5)-H(5B)   | 0.94(4)   | C(11)-C(16)  | 1.394(4)  |
| C(11)-C(12)  | 1.412(4)  | C(12)-C(13)  | 1.400(4)  |
| C(13)-C(14)  | 1.386(4)  | C(13)-H(13)  | 0.9400    |
| C(14)-C(15)  | 1.385(4)  | C(14)-H(14)  | 0.9400    |
| C(15)-C(16)  | 1.381(4)  | C(15)-H(15)  | 0.9400    |
| C(16)-H(16)  | 0.9400    | C(21)-C(22)  | 1.395(4)  |
| C(21)-C(26)  | 1.401(4)  | C(22)-C(23)  | 1.404(4)  |
| C(23)-C(24)  | 1.379(4)  | C(23)-H(23)  | 0.9400    |
| C(24)-C(25)  | 1.389(4)  | C(24)-H(24)  | 0.9400    |
| C(25)-C(26)  | 1.381(4)  | C(25)-H(25)  | 0.9400    |
| C(26)-H(26)  | 0.9400    | C(31)-C(34)  | 1.529(4)  |
| C(31)-C(33)  | 1.533(4)  | C(31)-H(31)  | 0.9900    |
| C(32)-C(35)  | 1.527(4)  | C(32)-C(36)  | 1.531(4)  |
| C(32)-H(32)  | 0.9900    | C(33)-H(33A) | 0.9700    |
| C(33)-H(33B) | 0.9700    | C(33)-H(33C) | 0.9700    |
| C(34)-H(34A) | 0.9700    | C(34)-H(34B) | 0.9700    |
| C(34)-H(34C) | 0.9700    | C(35)-H(35A) | 0.9700    |
| C(35)-H(35B) | 0.9700    | C(35)-H(35C) | 0.9700    |
| C(36)-H(36A) | 0.9700    | C(36)-H(36B) | 0.9700    |
| C(36)-H(36C) | 0.9700    | C(41)-C(44)  | 1.530(4)  |
| C(41)-C(43)  | 1.533(4)  | C(41)-H(41)  | 0.9900    |
| C(42)-C(46)  | 1.528(4)  | C(42)-C(45)  | 1.528(4)  |
| C(42)-H(42)  | 0.9900    | C(43)-H(43A) | 0.9700    |
| C(43)-H(43B) | 0.9700    | C(43)-H(43C) | 0.9700    |
| C(44)-H(44A) | 0.9700    | C(44)-H(44B) | 0.9700    |
| C(44)-H(44C) | 0.9700    | C(45)-H(45A) | 0.9700    |
| C(45)-H(45B) | 0.9700    | C(45)-H(45C) | 0.9700    |
| C(46)-H(46A) | 0.9700    | C(46)-H(46B) | 0.9700    |
| C(46)-H(46C) | 0.9700    | C(51)-N(5)   | 1.338(4)  |
| C(51)-C(52)  | 1.391(4)  | C(51)-H(51)  | 0.9400    |
| C(52)-C(53)  | 1.349(5)  | C(52)-H(52)  | 0.9400    |
| C(53)-C(54)  | 1.387(4)  | C(53)-H(53)  | 0.9400    |
| C(54)-C(59)  | 1.410(4)  | C(54)-C(55)  | 1.436(4)  |
| C(55)-C(56)  | 1.344(5)  | C(55)-H(55)  | 0.9400    |
| C(56)-C(57)  | 1.460(5)  | C(56)-H(56)  | 0.9400    |
| C(57)-C(58)  | 1.372(4)  | C(57)-H(57)  | 0.9400    |
| C(58)-C(59)  | 1.415(4)  | C(59)-N(5)   | 1.401(4)  |

**Table S30.** Angles [°] for [ $\{\text{PC}(\text{sp}^3)\text{HP}\}\text{Fe}\{-\text{C}(\text{sp}^3)\text{H}_2\text{-N}^{\text{quin}}-\}$ ] (7).

| atom-atom-atom      | angle      | atom-atom-atom      | angle      |
|---------------------|------------|---------------------|------------|
| C(5)-Fe-C           | 174.01(11) | C(5)-Fe-N(5)        | 82.59(11)  |
| C-Fe-N(5)           | 103.20(10) | C(5)-Fe-P(2)        | 94.51(9)   |
| C-Fe-P(2)           | 83.17(8)   | N(5)-Fe-P(2)        | 98.72(7)   |
| C(5)-Fe-P(1)        | 97.80(9)   | C-Fe-P(1)           | 82.06(7)   |
| N(5)-Fe-P(1)        | 107.18(7)  | P(2)-Fe-P(1)        | 152.49(3)  |
| C(12)-P(1)-C(32)    | 102.86(13) | C(12)-P(1)-C(31)    | 106.43(13) |
| C(32)-P(1)-C(31)    | 102.42(13) | C(12)-P(1)-Fe       | 100.44(9)  |
| C(32)-P(1)-Fe       | 120.76(9)  | C(31)-P(1)-Fe       | 121.59(10) |
| C(11)-C-C(21)       | 115.3(2)   | C(11)-C-Fe          | 111.52(17) |
| C(21)-C-Fe          | 116.72(18) | C(11)-C-H           | 105.8(19)  |
| C(21)-C-H           | 106.4(19)  | Fe-C-H              | 98.9(19)   |
| C(22)-P(2)-C(41)    | 102.82(13) | C(22)-P(2)-C(42)    | 105.63(13) |
| C(41)-P(2)-C(42)    | 103.55(13) | C(22)-P(2)-Fe       | 105.18(9)  |
| C(41)-P(2)-Fe       | 126.66(10) | C(42)-P(2)-Fe       | 111.13(9)  |
| C(58)-C(5)-Fe       | 108.5(2)   | C(58)-C(5)-H(5A)    | 100(2)     |
| Fe-C(5)-H(5A)       | 126(2)     | C(58)-C(5)-H(5B)    | 104(2)     |
| Fe-C(5)-H(5B)       | 120(2)     | H(5A)-C(5)-H(5B)    | 95(3)      |
| C(16)-C(11)-C(12)   | 117.4(2)   | C(16)-C(11)-C       | 125.6(2)   |
| C(12)-C(11)-C       | 117.0(2)   | C(13)-C(12)-C(11)   | 120.2(3)   |
| C(13)-C(12)-P(1)    | 126.1(2)   | C(11)-C(12)-P(1)    | 113.41(19) |
| C(14)-C(13)-C(12)   | 120.6(3)   | C(14)-C(13)-H(13)   | 119.7      |
| C(12)-C(13)-H(13)   | 119.7      | C(15)-C(14)-C(13)   | 119.3(3)   |
| C(15)-C(14)-H(14)   | 120.3      | C(13)-C(14)-H(14)   | 120.3      |
| C(16)-C(15)-C(14)   | 120.3(3)   | C(16)-C(15)-H(15)   | 119.8      |
| C(14)-C(15)-H(15)   | 119.8      | C(15)-C(16)-C(11)   | 121.9(3)   |
| C(15)-C(16)-H(16)   | 119.1      | C(11)-C(16)-H(16)   | 119.1      |
| C(22)-C(21)-C(26)   | 118.2(2)   | C(22)-C(21)-C       | 119.3(2)   |
| C(26)-C(21)-C       | 122.4(2)   | C(21)-C(22)-C(23)   | 120.0(3)   |
| C(21)-C(22)-P(2)    | 112.79(19) | C(23)-C(22)-P(2)    | 127.1(2)   |
| C(24)-C(23)-C(22)   | 120.7(3)   | C(24)-C(23)-H(23)   | 119.7      |
| C(22)-C(23)-H(23)   | 119.7      | C(23)-C(24)-C(25)   | 119.7(3)   |
| C(23)-C(24)-H(24)   | 120.1      | C(25)-C(24)-H(24)   | 120.1      |
| C(26)-C(25)-C(24)   | 119.8(3)   | C(26)-C(25)-H(25)   | 120.1      |
| C(24)-C(25)-H(25)   | 120.1      | C(25)-C(26)-C(21)   | 121.5(3)   |
| C(25)-C(26)-H(26)   | 119.2      | C(21)-C(26)-H(26)   | 119.2      |
| C(34)-C(31)-C(33)   | 110.3(2)   | C(34)-C(31)-P(1)    | 115.2(2)   |
| C(33)-C(31)-P(1)    | 109.17(19) | C(34)-C(31)-H(31)   | 107.3      |
| C(33)-C(31)-H(31)   | 107.3      | P(1)-C(31)-H(31)    | 107.3      |
| C(35)-C(32)-C(36)   | 111.3(3)   | C(35)-C(32)-P(1)    | 110.56(19) |
| C(36)-C(32)-P(1)    | 111.8(2)   | C(35)-C(32)-H(32)   | 107.7      |
| C(36)-C(32)-H(32)   | 107.7      | P(1)-C(32)-H(32)    | 107.7      |
| C(31)-C(33)-H(33A)  | 109.5      | C(31)-C(33)-H(33B)  | 109.5      |
| H(33A)-C(33)-H(33B) | 109.5      | C(31)-C(33)-H(33C)  | 109.5      |
| H(33A)-C(33)-H(33C) | 109.5      | H(33B)-C(33)-H(33C) | 109.5      |
| C(31)-C(34)-H(34A)  | 109.5      | C(31)-C(34)-H(34B)  | 109.5      |

|                     |            |                     |            |
|---------------------|------------|---------------------|------------|
| H(34A)-C(34)-H(34B) | 109.5      | C(31)-C(34)-H(34C)  | 109.5      |
| H(34A)-C(34)-H(34C) | 109.5      | H(34B)-C(34)-H(34C) | 109.5      |
| C(32)-C(35)-H(35A)  | 109.5      | C(32)-C(35)-H(35B)  | 109.5      |
| H(35A)-C(35)-H(35B) | 109.5      | C(32)-C(35)-H(35C)  | 109.5      |
| H(35A)-C(35)-H(35C) | 109.5      | H(35B)-C(35)-H(35C) | 109.5      |
| C(32)-C(36)-H(36A)  | 109.5      | C(32)-C(36)-H(36B)  | 109.5      |
| H(36A)-C(36)-H(36B) | 109.5      | C(32)-C(36)-H(36C)  | 109.5      |
| H(36A)-C(36)-H(36C) | 109.5      | H(36B)-C(36)-H(36C) | 109.5      |
| C(44)-C(41)-C(43)   | 110.3(3)   | C(44)-C(41)-P(2)    | 111.8(2)   |
| C(43)-C(41)-P(2)    | 111.0(2)   | C(44)-C(41)-H(41)   | 107.9      |
| C(43)-C(41)-H(41)   | 107.9      | P(2)-C(41)-H(41)    | 107.9      |
| C(46)-C(42)-C(45)   | 110.7(2)   | C(46)-C(42)-P(2)    | 115.6(2)   |
| C(45)-C(42)-P(2)    | 108.51(19) | C(46)-C(42)-H(42)   | 107.2      |
| C(45)-C(42)-H(42)   | 107.2      | P(2)-C(42)-H(42)    | 107.2      |
| C(41)-C(43)-H(43A)  | 109.5      | C(41)-C(43)-H(43B)  | 109.5      |
| H(43A)-C(43)-H(43B) | 109.5      | C(41)-C(43)-H(43C)  | 109.5      |
| H(43A)-C(43)-H(43C) | 109.5      | H(43B)-C(43)-H(43C) | 109.5      |
| C(41)-C(44)-H(44A)  | 109.5      | C(41)-C(44)-H(44B)  | 109.5      |
| H(44A)-C(44)-H(44B) | 109.5      | C(41)-C(44)-H(44C)  | 109.5      |
| H(44A)-C(44)-H(44C) | 109.5      | H(44B)-C(44)-H(44C) | 109.5      |
| C(42)-C(45)-H(45A)  | 109.5      | C(42)-C(45)-H(45B)  | 109.5      |
| H(45A)-C(45)-H(45B) | 109.5      | C(42)-C(45)-H(45C)  | 109.5      |
| H(45A)-C(45)-H(45C) | 109.5      | H(45B)-C(45)-H(45C) | 109.5      |
| C(42)-C(46)-H(46A)  | 109.5      | C(42)-C(46)-H(46B)  | 109.5      |
| H(46A)-C(46)-H(46B) | 109.5      | C(42)-C(46)-H(46C)  | 109.5      |
| H(46A)-C(46)-H(46C) | 109.5      | H(46B)-C(46)-H(46C) | 109.5      |
| N(5)-C(51)-C(52)    | 122.9(3)   | N(5)-C(51)-H(51)    | 118.6      |
| C(52)-C(51)-H(51)   | 118.6      | C(53)-C(52)-C(51)   | 120.8(3)   |
| C(53)-C(52)-H(52)   | 119.6      | C(51)-C(52)-H(52)   | 119.6      |
| C(52)-C(53)-C(54)   | 118.8(3)   | C(52)-C(53)-H(53)   | 120.6      |
| C(54)-C(53)-H(53)   | 120.6      | C(53)-C(54)-C(59)   | 119.7(3)   |
| C(53)-C(54)-C(55)   | 123.5(3)   | C(59)-C(54)-C(55)   | 116.8(3)   |
| C(56)-C(55)-C(54)   | 120.3(3)   | C(56)-C(55)-H(55)   | 119.8      |
| C(54)-C(55)-H(55)   | 119.8      | C(55)-C(56)-C(57)   | 121.1(3)   |
| C(55)-C(56)-H(56)   | 119.5      | C(57)-C(56)-H(56)   | 119.5      |
| C(58)-C(57)-C(56)   | 120.9(3)   | C(58)-C(57)-H(57)   | 119.5      |
| C(56)-C(57)-H(57)   | 119.5      | C(57)-C(58)-C(59)   | 116.4(3)   |
| C(57)-C(58)-C(5)    | 124.2(3)   | C(59)-C(58)-C(5)    | 119.4(3)   |
| N(5)-C(59)-C(54)    | 120.4(3)   | N(5)-C(59)-C(58)    | 115.2(3)   |
| C(54)-C(59)-C(58)   | 124.4(3)   | C(51)-N(5)-C(59)    | 117.3(2)   |
| C(51)-N(5)-Fe       | 128.6(2)   | C(59)-N(5)-Fe       | 113.95(18) |

#### 4. References

(1) Hoffbauer, M. R.; Iluc, V. M. [2+2] Cycloadditions with an Iron Carbene: A Critical Step in Enyne Metathesis. *Journal of the American Chemical Society* **2021**, *143* (15), 5592-5597. DOI: 10.1021/jacs.0c12175.
